# Supplementary material for: Dynamic molecular evolution of a supergene with suppressed recombination in white-throated sparrows
Source: bioRxiv preprint, doi:10.1101/2022.02.28.481145, version 2 (2022-04-21)
Supplement: Supp. Table 5 [file 481145_file05.xlsx]

## Sheet: Hscan_Z2m_genes
chrom	chromStart	chromEnd	gene_name
NW_005081553.1	3750352	3998636	KHDRBS2
NW_005081553.1	4450554	4538690	ANKRD6
NW_005081553.1	6960029	6972883	MANEA
NW_005081553.1	7441249	7562907	KLHL32
NW_005081553.1	7662258	7822646	LOC113458862
NW_005081553.1	8707714	8711975	TSTD3
NW_005081553.1	9599632	9963922	GRIK2
NW_005081561.1	1585705	1665010	SESN1
NW_005081561.1	2400430	2528889	PDSS2
NW_005081561.1	2539655	2559822	BEND3
NW_005081561.1	2573293	2588945	MEP1A
NW_005081577.1	930082	961638	KIZ
NW_005081577.1	962245	995189	XRN2
NW_005081577.1	1058003	1060837	PAX1
NW_005081577.1	1215991	1223946	LOC102074465
NW_005081577.1	1224081	1233052	GZF1
NW_005081577.1	1575401	1686073	SPTBN1
NW_005081577.1	1693414	1785269	EML6
NW_005081577.1	1880165	1881392	RPS27A
NW_005081577.1	1893007	1897379	LOC102065273
NW_005081577.1	1990044	1996433	CFAP36
NW_005081582.1	454964	507658	NOL10
NW_005081589.1	2910271	2998083	ARID4B
NW_005081589.1	3000306	3006904	RBM34
NW_005081589.1	3013070	3017291	TOMM20
NW_005081620.1	536276	552865	AARS2
NW_005081620.1	567499	583297	TCTE1
NW_005081620.1	1762446	1868980	SDCCAG8
NW_005081620.1	2349900	2380337	EFCAB2
NW_005081821.1	31860	108096	SUSD4
NW_005081821.1	147233	155444	TLR5
NW_005081553.1	161734	266628	SMAP1
NW_005081553.1	272177	282196	SDHAF4
NW_005081553.1	284979	365767	FAM135A
NW_005081553.1	4351005	4386785	LOC102064984
NW_005081553.1	4387513	4414326	UBE2J1
NW_005081553.1	4423183	4445524	RRAGD
NW_005081553.1	7569975	7660583	MMS22L
NW_005081553.1	8378522	8435086	FBXL4
NW_005081553.1	8573375	8600423	FAXC
NW_005081553.1	8613142	8619725	COQ3
NW_005081553.1	8624523	8649938	PNISR
NW_005081553.1	8655251	8699064	USP45
NW_005081553.1	8712118	8727618	CCNC
NW_005081553.1	9114860	9163481	SIM1
NW_005081553.1	9182502	9441284	ASCC3
NW_005081561.1	1660537	1729824	ARMC2
NW_005081561.1	2589509	2630732	ADGRF5
NW_005081577.1	764756	861306	RALGAPA2
NW_005081577.1	1057027	1057825	LOC106629373
NW_005081577.1	1193610	1195913	LOC113459242
NW_005081577.1	1233522	1240159	LOC102074649
NW_005081577.1	1881923	1891522	MTIF2
NW_005081577.1	1897926	1932998	CCDC88A
NW_005081577.1	1944566	1968163	LOC106629374
NW_005081577.1	1997598	2015269	PPP4R3B
NW_005081582.1	431766	454886	ATP6V1C2
NW_005081582.1	921162	935853	KLF11
NW_005081582.1	946849	987206	GRHL1
NW_005081620.1	493943	521412	CMTR1
NW_005081620.1	522795	533021	RNF8
NW_005081620.1	579364	591779	TMEM151B
NW_005081620.1	676796	696234	LOC102068338
NW_005081620.1	702426	715405	CAPN11
NW_005081620.1	718045	766844	TMEM63B
NW_005081620.1	1871641	2006775	AKT3
NW_005081620.1	2315380	2330008	HNRNPU
NW_005081821.1	204036	298056	DISP1

## Sheet: Hscan_output_Z2m_TSref_win20000
Index	Scaffold	Start	End	Number of Polymorphic sites	ZAL2m_H_value	ZAL2m_empirical_pvalue
1	NW_005081577.1	5940001	5960000	5	56960	0.905124
2	NW_005081577.1	5920001	5940000	6	66545.2	0.773427
3	NW_005081577.1	5900001	5920000	7	69317	0.721216
4	NW_005081577.1	5880001	5900000	4	67735.2	0.753555
5	NW_005081577.1	5860001	5880000	13	64053.7	0.81843
6	NW_005081577.1	5840001	5860000	11	56104.8	0.912722
7	NW_005081577.1	5820001	5840000	11	53443.6	0.933762
8	NW_005081577.1	5800001	5820000	8	66517.4	0.774596
9	NW_005081577.1	5780001	5800000	8	69674	0.713228
10	NW_005081577.1	5760001	5780000	9	78929.7	0.513929
11	NW_005081577.1	5740001	5760000	7	85419	0.380869
12	NW_005081577.1	5720001	5740000	6	73099.1	0.646406
13	NW_005081577.1	5700001	5720000	9	74702.6	0.612507
14	NW_005081577.1	5680001	5700000	10	75224.5	0.597896
15	NW_005081577.1	5660001	5680000	9	76266.2	0.572764
16	NW_005081577.1	5640001	5660000	10	78383.7	0.528151
17	NW_005081577.1	5620001	5640000	5	80570.4	0.474576
18	NW_005081577.1	5600001	5620000	6	78661	0.522112
19	NW_005081577.1	5580001	5600000	9	82146.3	0.444964
20	NW_005081577.1	5560001	5580000	11	65679.2	0.789792
21	NW_005081577.1	5540001	5560000	14	61668.1	0.854081
22	NW_005081577.1	5520001	5540000	11	64841.7	0.804793
23	NW_005081577.1	5500001	5520000	5	79049.2	0.510812
24	NW_005081577.1	5480001	5500000	9	77075	0.554646
25	NW_005081577.1	5460001	5480000	14	87056.3	0.348919
26	NW_005081577.1	5440001	5460000	5	88160.2	0.333139
27	NW_005081577.1	5420001	5440000	7	86064.6	0.36879
28	NW_005081577.1	5400001	5420000	4	84645.5	0.397234
29	NW_005081577.1	5380001	5400000	9	70181.6	0.701539
30	NW_005081577.1	5360001	5380000	3	89470.8	0.312098
31	NW_005081577.1	5340001	5360000	3	89710.2	0.307423
32	NW_005081577.1	5320001	5340000	6	94225.2	0.24625
33	NW_005081577.1	5300001	5320000	8	86854.2	0.352815
34	NW_005081577.1	5280001	5300000	11	81594.2	0.453536
35	NW_005081577.1	5260001	5280000	7	73190.2	0.644263
36	NW_005081577.1	5240001	5260000	6	68356.1	0.74284
37	NW_005081577.1	5220001	5240000	4	66752.3	0.76953
38	NW_005081577.1	5200001	5220000	12	76141.8	0.575492
39	NW_005081577.1	5180001	5200000	6	120347	0.0601987
40	NW_005081577.1	5140001	5160000	2	91207.6	0.284824
41	NW_005081577.1	5120001	5140000	6	92896.9	0.26203
42	NW_005081577.1	5100001	5120000	7	89637.3	0.308786
43	NW_005081577.1	5080001	5100000	10	84228.6	0.405416
44	NW_005081577.1	5060001	5080000	14	70066.4	0.703682
45	NW_005081577.1	5040001	5060000	9	69051.5	0.728034
46	NW_005081577.1	5020001	5040000	7	72859.8	0.651666
47	NW_005081577.1	5000001	5020000	2	86450	0.362751
48	NW_005081577.1	4980001	5000000	12	64281.5	0.815702
49	NW_005081577.1	4960001	4980000	8	62810.3	0.838691
50	NW_005081577.1	4940001	4960000	8	64782.4	0.806741
51	NW_005081577.1	4920001	4940000	8	66702.3	0.77031
52	NW_005081577.1	4900001	4920000	7	66187.5	0.779661
53	NW_005081577.1	4880001	4900000	7	67656.3	0.755504
54	NW_005081577.1	4860001	4880000	8	62603.8	0.842782
55	NW_005081577.1	4840001	4860000	12	63630.6	0.824859
56	NW_005081577.1	4820001	4840000	15	78388.7	0.527956
57	NW_005081577.1	4800001	4820000	5	78721.1	0.520358
58	NW_005081577.1	4780001	4800000	5	85019	0.389051
59	NW_005081577.1	4760001	4780000	6	81867	0.44886
60	NW_005081577.1	4740001	4760000	10	91103.1	0.286382
61	NW_005081577.1	4720001	4740000	3	88360.3	0.330606
62	NW_005081577.1	4700001	4720000	4	89122.5	0.317748
63	NW_005081577.1	4680001	4700000	12	87508.2	0.341905
64	NW_005081577.1	4660001	4680000	7	73549.8	0.637444
65	NW_005081577.1	4640001	4660000	10	61975.9	0.851159
66	NW_005081577.1	4620001	4640000	11	68474.8	0.738749
67	NW_005081577.1	4600001	4620000	11	65213.6	0.799922
68	NW_005081577.1	4580001	4600000	8	62564.4	0.843561
69	NW_005081577.1	4560001	4580000	9	67072	0.763296
70	NW_005081577.1	4540001	4560000	8	71823.7	0.672122
71	NW_005081577.1	4520001	4540000	5	72880.6	0.651081
72	NW_005081577.1	4500001	4520000	12	72538.8	0.659069
73	NW_005081577.1	4480001	4500000	10	67544.4	0.757257
74	NW_005081577.1	4460001	4480000	11	69033.1	0.729008
75	NW_005081577.1	4440001	4460000	7	73966.9	0.627119
76	NW_005081577.1	4420001	4440000	6	82938	0.429573
77	NW_005081577.1	4400001	4420000	8	78540.5	0.524644
78	NW_005081577.1	4380001	4400000	7	78289.2	0.530099
79	NW_005081577.1	4360001	4380000	11	79000	0.511981
80	NW_005081577.1	4340001	4360000	6	89652.6	0.308397
81	NW_005081577.1	4320001	4340000	6	86841.6	0.3534
82	NW_005081577.1	4300001	4320000	7	88155.3	0.333528
83	NW_005081577.1	4280001	4300000	5	69168.2	0.724333
84	NW_005081577.1	4260001	4280000	6	81088.4	0.464056
85	NW_005081577.1	4240001	4260000	5	91243.1	0.284629
86	NW_005081577.1	4220001	4240000	6	92623	0.265926
87	NW_005081577.1	4200001	4220000	14	88288.9	0.33158
88	NW_005081577.1	4180001	4200000	14	73021.5	0.647769
89	NW_005081577.1	4160001	4180000	5	55308.4	0.91954
90	NW_005081577.1	4140001	4160000	12	65809.2	0.788233
91	NW_005081577.1	4120001	4140000	5	66588.9	0.772258
92	NW_005081577.1	4100001	4120000	7	69399.1	0.720047
93	NW_005081577.1	4080001	4100000	15	69264.4	0.722579
94	NW_005081577.1	4060001	4080000	10	58743.8	0.8872
95	NW_005081577.1	4040001	4060000	9	65486.9	0.792519
96	NW_005081577.1	4020001	4040000	5	51117.6	0.949347
97	NW_005081577.1	4000001	4020000	10	66600.8	0.771479
98	NW_005081577.1	3980001	4000000	5	79931.1	0.488408
99	NW_005081577.1	3960001	3980000	6	83707.1	0.414962
100	NW_005081577.1	3940001	3960000	7	83435.8	0.419248
101	NW_005081577.1	3920001	3940000	2	107605	0.115527
102	NW_005081577.1	3900001	3920000	6	86912.2	0.351841
103	NW_005081577.1	3880001	3900000	4	85007.2	0.389441
104	NW_005081577.1	3860001	3880000	8	95769.3	0.224625
105	NW_005081577.1	3840001	3860000	6	90596.7	0.29359
106	NW_005081577.1	3820001	3840000	5	97209.9	0.206507
107	NW_005081577.1	3800001	3820000	3	90092.1	0.300799
108	NW_005081577.1	3780001	3800000	13	83706.4	0.415157
109	NW_005081577.1	3760001	3780000	16	79498.2	0.499513
110	NW_005081577.1	3740001	3760000	6	79847.8	0.490746
111	NW_005081577.1	3720001	3740000	4	59616.6	0.878044
112	NW_005081577.1	3700001	3720000	11	67457.1	0.75901
113	NW_005081577.1	3680001	3700000	10	68928.3	0.730372
114	NW_005081577.1	3660001	3680000	12	65273.6	0.797389
115	NW_005081577.1	3640001	3660000	8	73135.2	0.646016
116	NW_005081577.1	3620001	3640000	12	78468.1	0.526008
117	NW_005081577.1	3600001	3620000	9	85922.9	0.371712
118	NW_005081577.1	3580001	3600000	8	81001.1	0.465615
119	NW_005081577.1	3560001	3580000	8	98643.6	0.191116
120	NW_005081577.1	3540001	3560000	9	85908.3	0.372297
121	NW_005081577.1	3520001	3540000	8	102473	0.156828
122	NW_005081577.1	3500001	3520000	2	104543	0.137152
123	NW_005081577.1	3480001	3500000	2	105481	0.130138
124	NW_005081577.1	3460001	3480000	8	111265	0.0937074
125	NW_005081577.1	3440001	3460000	9	86544.3	0.360608
126	NW_005081577.1	3420001	3440000	7	97722.4	0.200468
127	NW_005081577.1	3400001	3420000	6	89409.1	0.313267
128	NW_005081577.1	3380001	3400000	13	88203	0.332554
129	NW_005081577.1	3360001	3380000	7	90850.7	0.289499
130	NW_005081577.1	3340001	3360000	14	81376.4	0.458601
131	NW_005081577.1	3320001	3340000	7	78084.2	0.534191
132	NW_005081577.1	3300001	3320000	7	79942.3	0.488019
133	NW_005081577.1	3280001	3300000	10	88387.9	0.329827
134	NW_005081577.1	3260001	3280000	9	89409.8	0.313072
135	NW_005081577.1	3240001	3260000	15	98705.2	0.190532
136	NW_005081577.1	3220001	3240000	4	106613	0.12293
137	NW_005081577.1	3200001	3220000	4	113386	0.0839665
138	NW_005081577.1	3180001	3200000	3	110332	0.0991623
139	NW_005081577.1	3160001	3180000	6	113536	0.0829924
140	NW_005081577.1	3140001	3160000	8	108622	0.108903
141	NW_005081577.1	3120001	3140000	8	108902	0.108124
142	NW_005081577.1	3100001	3120000	8	108238	0.111631
143	NW_005081577.1	3080001	3100000	6	109034	0.106955
144	NW_005081577.1	3060001	3080000	4	97528.4	0.203195
145	NW_005081577.1	3040001	3060000	5	86007.9	0.369375
146	NW_005081577.1	3020001	3040000	6	86786.6	0.355153
147	NW_005081577.1	3000001	3020000	11	66821.4	0.768362
148	NW_005081577.1	2980001	3000000	5	78439	0.526398
149	NW_005081577.1	2960001	2980000	1	79769.2	0.492889
150	NW_005081577.1	2940001	2960000	16	79300.3	0.505163
151	NW_005081577.1	2920001	2940000	19	61584.9	0.854861
152	NW_005081577.1	2900001	2920000	3	63031.3	0.835184
153	NW_005081577.1	2880001	2900000	13	63462.3	0.82895
154	NW_005081577.1	2860001	2880000	8	70041.6	0.704656
155	NW_005081577.1	2840001	2860000	8	79120.6	0.509254
156	NW_005081577.1	2820001	2840000	9	67206.3	0.761153
157	NW_005081577.1	2800001	2820000	10	64603	0.810247
158	NW_005081577.1	2780001	2800000	5	69450.6	0.719267
159	NW_005081577.1	2760001	2780000	10	60761.4	0.864602
160	NW_005081577.1	2740001	2760000	12	64131.9	0.817261
161	NW_005081577.1	2720001	2740000	10	67583.7	0.756088
162	NW_005081577.1	2700001	2720000	11	70268.4	0.699786
163	NW_005081577.1	2680001	2700000	10	77367.4	0.548802
164	NW_005081577.1	2660001	2680000	2	78078.2	0.534385
165	NW_005081577.1	2640001	2660000	9	78771.3	0.518995
166	NW_005081577.1	2620001	2640000	8	65701.5	0.789402
167	NW_005081577.1	2600001	2620000	13	65265.7	0.797974
168	NW_005081577.1	2580001	2600000	7	62571.2	0.843172
169	NW_005081577.1	2560001	2580000	11	61777.8	0.853107
170	NW_005081577.1	2540001	2560000	13	56841.4	0.906293
171	NW_005081577.1	2520001	2540000	12	57313.6	0.901617
172	NW_005081577.1	2500001	2520000	8	65704.6	0.789207
173	NW_005081577.1	2480001	2500000	9	65128.5	0.800896
174	NW_005081577.1	2460001	2480000	5	70429	0.696279
175	NW_005081577.1	2440001	2460000	9	63625.9	0.825054
176	NW_005081577.1	2420001	2440000	13	60418.1	0.868303
177	NW_005081577.1	2400001	2420000	5	58072.3	0.89324
178	NW_005081577.1	2380001	2400000	16	60838.8	0.863628
179	NW_005081577.1	2360001	2380000	9	60311.3	0.869862
180	NW_005081577.1	2340001	2360000	8	60154.2	0.871615
181	NW_005081577.1	2320001	2340000	11	65374.4	0.794857
182	NW_005081577.1	2300001	2320000	8	75470.3	0.591467
183	NW_005081577.1	2280001	2300000	3	78762.6	0.519579
184	NW_005081577.1	2260001	2280000	3	77654.3	0.541399
185	NW_005081577.1	2240001	2260000	11	80931.2	0.466784
186	NW_005081577.1	2220001	2240000	15	80089	0.484902
187	NW_005081577.1	2200001	2220000	4	88435.4	0.328268
188	NW_005081577.1	2180001	2200000	6	101072	0.168712
189	NW_005081577.1	2160001	2180000	4	100596	0.173193
190	NW_005081577.1	2140001	2160000	7	101158	0.167738
191	NW_005081577.1	2120001	2140000	11	95719.1	0.225404
192	NW_005081577.1	2100001	2120000	3	95665.6	0.226184
193	NW_005081577.1	2080001	2100000	6	107353	0.11728
194	NW_005081577.1	2060001	2080000	10	97081.6	0.208455
195	NW_005081577.1	2040001	2060000	7	102447	0.157023
196	NW_005081577.1	2020001	2040000	2	120181	0.0613676
197	NW_005081577.1	2000001	2020000	8	116056	0.0757841
198	NW_005081577.1	1980001	2000000	7	131164	0.035262
199	NW_005081577.1	1960001	1980000	4	142028	0.0181181
200	NW_005081577.1	1940001	1960000	2	142670	0.017144
201	NW_005081577.1	1900001	1920000	8	143454	0.0159751
202	NW_005081577.1	1880001	1900000	4	152972	0.0112994
203	NW_005081577.1	1860001	1880000	4	163606	0.00701344
204	NW_005081577.1	1840001	1860000	3	128339	0.0393532
205	NW_005081577.1	1820001	1840000	3	126126	0.0453926
206	NW_005081577.1	1800001	1820000	8	120209	0.0607832
207	NW_005081577.1	1780001	1800000	4	121909	0.054549
208	NW_005081577.1	1760001	1780000	4	130030	0.0370154
209	NW_005081577.1	1740001	1760000	3	145869	0.0144165
210	NW_005081577.1	1720001	1740000	5	140407	0.0204559
211	NW_005081577.1	1700001	1720000	1	141229	0.0196766
212	NW_005081577.1	1680001	1700000	4	136442	0.025716
213	NW_005081577.1	1660001	1680000	3	129765	0.0372102
214	NW_005081577.1	1640001	1660000	8	131218	0.0350672
215	NW_005081577.1	1620001	1640000	1	104109	0.140658
216	NW_005081577.1	1600001	1620000	7	92479.2	0.2669
217	NW_005081577.1	1580001	1600000	8	91444.3	0.281707
218	NW_005081577.1	1560001	1580000	5	87262.8	0.345996
219	NW_005081577.1	1540001	1560000	10	84653.9	0.396649
220	NW_005081577.1	1520001	1540000	8	74736.1	0.611923
221	NW_005081577.1	1500001	1520000	4	80028.9	0.485486
222	NW_005081577.1	1480001	1500000	11	85487.9	0.379505
223	NW_005081577.1	1460001	1480000	7	79641.1	0.495032
224	NW_005081577.1	1440001	1460000	6	54897.2	0.923437
225	NW_005081577.1	1420001	1440000	8	65846.7	0.788038
226	NW_005081577.1	1400001	1420000	7	72167.1	0.666277
227	NW_005081577.1	1380001	1400000	5	68493.1	0.73836
228	NW_005081577.1	1360001	1380000	13	79832.4	0.49172
229	NW_005081577.1	1340001	1360000	9	105421	0.130723
230	NW_005081577.1	1320001	1340000	5	109964	0.101695
231	NW_005081577.1	1300001	1320000	4	118010	0.0693552
232	NW_005081577.1	1280001	1300000	7	121188	0.056692
233	NW_005081577.1	1260001	1280000	3	122199	0.0539645
234	NW_005081577.1	1240001	1260000	8	121360	0.0559127
235	NW_005081577.1	1220001	1240000	7	138443	0.0227937
236	NW_005081577.1	1200001	1220000	6	139889	0.0208455
237	NW_005081577.1	1180001	1200000	2	133761	0.0292227
238	NW_005081577.1	1160001	1180000	1	139116	0.0218196
239	NW_005081577.1	1140001	1160000	1	136698	0.0251315
240	NW_005081577.1	1120001	1140000	8	147327	0.0142217
241	NW_005081577.1	1100001	1120000	2	139896	0.0206507
242	NW_005081577.1	1080001	1100000	11	133448	0.0298071
243	NW_005081577.1	1060001	1080000	6	138348	0.0229885
244	NW_005081577.1	1040001	1060000	2	142479	0.0175336
245	NW_005081577.1	1000001	1020000	1	141416	0.019287
246	NW_005081577.1	980001	1000000	6	144556	0.015001
247	NW_005081577.1	960001	980000	13	135713	0.0268849
248	NW_005081577.1	940001	960000	7	111861	0.0902007
249	NW_005081577.1	920001	940000	4	123855	0.0496786
250	NW_005081577.1	900001	920000	6	117916	0.06955
251	NW_005081577.1	880001	900000	3	119166	0.0656536
252	NW_005081577.1	860001	880000	5	125494	0.0465615
253	NW_005081577.1	840001	860000	12	114142	0.0818235
254	NW_005081577.1	820001	840000	2	111102	0.0946815
255	NW_005081577.1	800001	820000	12	104197	0.139879
256	NW_005081577.1	780001	800000	7	104025	0.141438
257	NW_005081577.1	760001	780000	3	111389	0.0935126
258	NW_005081577.1	740001	760000	9	107329	0.11767
259	NW_005081577.1	720001	740000	6	101675	0.161309
260	NW_005081577.1	700001	720000	15	89723.6	0.307033
261	NW_005081577.1	680001	700000	14	83744.9	0.414572
262	NW_005081577.1	660001	680000	2	86244.6	0.367037
263	NW_005081577.1	640001	660000	6	88436.9	0.328073
264	NW_005081577.1	620001	640000	9	90657.8	0.292422
265	NW_005081577.1	600001	620000	6	91524.9	0.279758
266	NW_005081577.1	580001	600000	9	105699	0.128775
267	NW_005081577.1	560001	580000	5	111158	0.0942918
268	NW_005081577.1	540001	560000	8	112979	0.0858173
269	NW_005081577.1	520001	540000	4	119474	0.0640951
270	NW_005081577.1	500001	520000	4	123508	0.0500682
271	NW_005081577.1	480001	500000	7	92004.6	0.273524
272	NW_005081577.1	460001	480000	10	95717.9	0.225599
273	NW_005081577.1	440001	460000	3	91772.8	0.276057
274	NW_005081577.1	420001	440000	5	93024.5	0.260082
275	NW_005081577.1	400001	420000	6	90259.2	0.297876
276	NW_005081577.1	380001	400000	10	91430.2	0.282291
277	NW_005081577.1	360001	380000	17	94094.1	0.246834
278	NW_005081577.1	340001	360000	7	106339	0.125073
279	NW_005081577.1	320001	340000	5	114614	0.0796805
280	NW_005081577.1	300001	320000	2	118488	0.067894
281	NW_005081577.1	280001	300000	2	119642	0.0629262
282	NW_005081577.1	260001	280000	10	119780	0.0625365
283	NW_005081577.1	240001	260000	4	119456	0.0644847
284	NW_005081577.1	220001	240000	5	122491	0.0526008
285	NW_005081577.1	200001	220000	7	113399	0.0837717
286	NW_005081577.1	180001	200000	7	98837.6	0.188973
287	NW_005081577.1	160001	180000	7	72565.2	0.658679
288	NW_005081577.1	140001	160000	8	68770.6	0.732905
289	NW_005081577.1	120001	140000	6	78152.6	0.533216
290	NW_005081577.1	100001	120000	11	79316	0.504773
291	NW_005081577.1	80001	100000	6	99217.8	0.184687
292	NW_005081577.1	60001	80000	2	97197.3	0.206702
293	NW_005081577.1	40001	60000	11	96560.4	0.215274
294	NW_005081577.1	20001	40000	9	92516.4	0.266706
295	NW_005081577.1	1	20000	3	80693.3	0.472044
296	NW_005081742.1	760001	780000	2	49851.9	0.95753
297	NW_005081742.1	740001	760000	7	56597.1	0.90863
298	NW_005081742.1	720001	740000	8	64613.6	0.809858
299	NW_005081742.1	700001	720000	6	75046.8	0.604325
300	NW_005081742.1	680001	700000	4	80282.2	0.481005
301	NW_005081742.1	660001	680000	8	78699.4	0.521138
302	NW_005081742.1	640001	660000	12	69957.2	0.70641
303	NW_005081742.1	620001	640000	10	68394.9	0.740892
304	NW_005081742.1	600001	620000	10	72384.3	0.661212
305	NW_005081742.1	580001	600000	13	75992.3	0.578999
306	NW_005081742.1	560001	580000	6	76940.5	0.557179
307	NW_005081742.1	540001	560000	7	75849.6	0.582895
308	NW_005081742.1	520001	540000	11	83028.1	0.42743
309	NW_005081742.1	500001	520000	8	69570	0.71615
310	NW_005081742.1	480001	500000	10	78486.7	0.525619
311	NW_005081742.1	460001	480000	5	82298.1	0.441652
312	NW_005081742.1	440001	460000	13	86822.4	0.353984
313	NW_005081742.1	420001	440000	6	89722	0.307228
314	NW_005081742.1	400001	420000	7	95271.4	0.231638
315	NW_005081742.1	380001	400000	7	96958.8	0.210793
316	NW_005081742.1	360001	380000	7	94452.8	0.242548
317	NW_005081742.1	340001	360000	16	82306.7	0.441262
318	NW_005081742.1	320001	340000	6	82524.9	0.437951
319	NW_005081742.1	300001	320000	10	78714.1	0.520553
320	NW_005081742.1	280001	300000	4	86755.4	0.356127
321	NW_005081742.1	260001	280000	6	89977.9	0.302942
322	NW_005081742.1	240001	260000	8	83734.1	0.414767
323	NW_005081742.1	220001	240000	8	81358.2	0.458991
324	NW_005081742.1	200001	220000	5	89536.8	0.310734
325	NW_005081742.1	180001	200000	2	85601.4	0.376583
326	NW_005081742.1	160001	180000	13	85576.4	0.376973
327	NW_005081742.1	140001	160000	9	90915.9	0.288915
328	NW_005081742.1	120001	140000	8	89844	0.304111
329	NW_005081742.1	100001	120000	11	84445.1	0.400935
330	NW_005081742.1	80001	100000	7	86685.4	0.358465
331	NW_005081742.1	60001	80000	12	82820.5	0.432106
332	NW_005081742.1	40001	60000	8	69096.4	0.726865
333	NW_005081742.1	20001	40000	4	60728.5	0.865381
334	NW_005081742.1	1	20000	1	55242.3	0.92032
335	NW_005082170.1	20001	40000	1	16466.8	1
336	NW_005082170.1	1	20000	5	16701.2	0.999805
337	NW_005081821.1	1	20000	5	133106	0.0315605
338	NW_005081821.1	20001	40000	7	149878	0.0124683
339	NW_005081821.1	40001	60000	5	167941	0.00526008
340	NW_005081821.1	60001	80000	6	168431	0.00506526
341	NW_005081821.1	80001	100000	6	164635	0.00642899
342	NW_005081821.1	100001	120000	1	160519	0.00779271
343	NW_005081821.1	140001	160000	2	166012	0.00603935
344	NW_005081821.1	160001	180000	3	156756	0.00896162
345	NW_005081821.1	180001	200000	4	148276	0.0138321
346	NW_005081821.1	200001	220000	9	131755	0.0342879
347	NW_005081821.1	220001	240000	8	112216	0.0892266
348	NW_005081821.1	240001	260000	3	114238	0.081239
349	NW_005081821.1	260001	280000	7	111830	0.0905903
350	NW_005081821.1	280001	300000	5	103748	0.14475
351	NW_005081821.1	300001	320000	6	93660.6	0.251315
352	NW_005081821.1	320001	340000	4	83135.2	0.426067
353	NW_005081821.1	340001	360000	5	78842.8	0.517241
354	NW_005081821.1	360001	380000	9	65044.9	0.80226
355	NW_005081821.1	380001	400000	9	44939.6	0.97292
356	NW_005081821.1	400001	420000	2	28487.3	0.997857
357	NW_005082055.1	40001	60000	1	26687	0.998831
358	NW_005082055.1	20001	40000	3	32636.3	0.996493
359	NW_005082055.1	1	20000	4	35491.1	0.993766
360	NW_005081832.1	1	20000	9	84426.3	0.401325
361	NW_005081832.1	20001	40000	3	91911.2	0.275083
362	NW_005081832.1	40001	60000	6	87269.6	0.345607
363	NW_005081832.1	60001	80000	6	83249.8	0.421975
364	NW_005081832.1	80001	100000	10	77971.8	0.535554
365	NW_005081832.1	100001	120000	10	74869.5	0.609001
366	NW_005081832.1	120001	140000	12	71808.6	0.672316
367	NW_005081832.1	140001	160000	9	68723	0.734268
368	NW_005081832.1	160001	180000	7	69559.1	0.71654
369	NW_005081832.1	180001	200000	4	68747.7	0.733489
370	NW_005081832.1	200001	220000	15	63283.9	0.831677
371	NW_005081832.1	220001	240000	8	57945.4	0.895188
372	NW_005081832.1	240001	260000	12	64386.2	0.813754
373	NW_005081832.1	260001	280000	10	61084.8	0.861679
374	NW_005081832.1	280001	300000	3	62219	0.847652
375	NW_005081832.1	300001	320000	5	61697.7	0.853887
376	NW_005081832.1	320001	340000	7	57651.7	0.898695
377	NW_005081832.1	340001	360000	4	19950.7	0.99961
378	NW_005081548.1	1	20000	9	44940.5	0.972726
379	NW_005081548.1	20001	40000	12	62178.9	0.848821
380	NW_005081548.1	40001	60000	13	66076.4	0.781999
381	NW_005081548.1	60001	80000	7	66704.3	0.770115
382	NW_005081548.1	80001	100000	8	65089.4	0.80187
383	NW_005081548.1	100001	120000	7	70099.8	0.702903
384	NW_005081548.1	120001	140000	7	65446.2	0.793298
385	NW_005081548.1	140001	160000	12	85532.3	0.377752
386	NW_005081548.1	160001	180000	4	84420.4	0.401714
387	NW_005081548.1	180001	200000	4	77833.3	0.537892
388	NW_005081548.1	200001	220000	8	79879.7	0.489772
389	NW_005081548.1	220001	240000	13	74760	0.611533
390	NW_005081548.1	240001	260000	10	66024.3	0.783752
391	NW_005081548.1	260001	280000	9	82996.5	0.428404
392	NW_005081548.1	280001	300000	11	85926.1	0.371323
393	NW_005081548.1	300001	320000	5	91727.1	0.277421
394	NW_005081548.1	320001	340000	4	100332	0.176115
395	NW_005081548.1	340001	360000	9	105801	0.127411
396	NW_005081548.1	360001	380000	1	105297	0.132476
397	NW_005081548.1	380001	400000	3	109491	0.104422
398	NW_005081548.1	400001	420000	2	106831	0.120982
399	NW_005081548.1	420001	440000	11	98601.1	0.191506
400	NW_005081548.1	440001	460000	12	81582.8	0.453926
401	NW_005081548.1	460001	480000	10	78951.2	0.513345
402	NW_005081548.1	480001	500000	6	87389.3	0.344438
403	NW_005081548.1	500001	520000	6	89679.7	0.308202
404	NW_005081548.1	520001	540000	9	99241.2	0.184492
405	NW_005081548.1	540001	560000	4	93269	0.25677
406	NW_005081548.1	560001	580000	1	94242.7	0.246055
407	NW_005081548.1	580001	600000	5	100877	0.170855
408	NW_005081548.1	600001	620000	5	98293.5	0.195792
409	NW_005081548.1	620001	640000	6	97807.1	0.199493
410	NW_005081548.1	640001	660000	10	88563.3	0.324567
411	NW_005081548.1	660001	680000	8	84161.4	0.406585
412	NW_005081548.1	680001	700000	12	82497.8	0.438535
413	NW_005081548.1	700001	720000	11	80276.1	0.481395
414	NW_005081548.1	720001	740000	10	86499.1	0.361972
415	NW_005081548.1	740001	760000	9	80136.6	0.484512
416	NW_005081548.1	760001	780000	11	87256.9	0.346191
417	NW_005081548.1	780001	800000	10	84506.6	0.399377
418	NW_005081548.1	800001	820000	7	76856.1	0.560101
419	NW_005081548.1	820001	840000	9	87013.7	0.350088
420	NW_005081548.1	840001	860000	12	98369.9	0.193844
421	NW_005081548.1	860001	880000	5	90392.3	0.296123
422	NW_005081548.1	880001	900000	6	97940.4	0.198325
423	NW_005081548.1	900001	920000	10	92404.4	0.267875
424	NW_005081548.1	920001	940000	7	91059.4	0.286967
425	NW_005081548.1	940001	960000	11	72822.7	0.652445
426	NW_005081548.1	960001	980000	9	74761	0.611338
427	NW_005081548.1	980001	1000000	11	75681.6	0.586012
428	NW_005081548.1	1000001	1020000	8	74149.3	0.622833
429	NW_005081548.1	1020001	1040000	9	66574.9	0.772842
430	NW_005081548.1	1040001	1060000	10	54461.6	0.927528
431	NW_005081548.1	1060001	1080000	14	70836.7	0.689655
432	NW_005081548.1	1080001	1100000	8	79208.7	0.507306
433	NW_005081548.1	1100001	1120000	12	83775.3	0.414183
434	NW_005081548.1	1120001	1140000	8	75201	0.59848
435	NW_005081548.1	1140001	1160000	11	79448.4	0.501851
436	NW_005081548.1	1160001	1180000	4	77825.3	0.538282
437	NW_005081548.1	1180001	1200000	13	77943.8	0.536334
438	NW_005081548.1	1200001	1220000	7	79287.6	0.505747
439	NW_005081548.1	1220001	1240000	7	78727.8	0.519969
440	NW_005081548.1	1240001	1260000	5	79176.4	0.508085
441	NW_005081548.1	1260001	1280000	10	75177.8	0.599844
442	NW_005081548.1	1280001	1300000	7	74815.8	0.610169
443	NW_005081548.1	1300001	1320000	10	87201.6	0.347165
444	NW_005081548.1	1320001	1340000	10	87061.4	0.348724
445	NW_005081548.1	1340001	1360000	6	86740.8	0.356711
446	NW_005081548.1	1360001	1380000	13	84464.8	0.400545
447	NW_005081548.1	1380001	1400000	9	83559.3	0.417495
448	NW_005081548.1	1400001	1420000	16	81532	0.454705
449	NW_005081548.1	1420001	1440000	5	69611	0.714981
450	NW_005081548.1	1440001	1460000	13	62830.9	0.837912
451	NW_005081548.1	1460001	1480000	11	64360.7	0.814533
452	NW_005081548.1	1480001	1500000	9	54948.1	0.922657
453	NW_005081548.1	1500001	1520000	12	93736.2	0.250536
454	NW_005081548.1	1520001	1540000	1	94608.5	0.24021
455	NW_005081548.1	1540001	1560000	9	95591.5	0.227742
456	NW_005081548.1	1560001	1580000	6	98324.7	0.195013
457	NW_005081548.1	1580001	1600000	7	96176	0.221703
458	NW_005081548.1	1600001	1620000	9	96767.8	0.21352
459	NW_005081548.1	1620001	1640000	10	92530.4	0.266511
460	NW_005081548.1	1640001	1660000	6	96007.9	0.223066
461	NW_005081548.1	1660001	1680000	6	96496.7	0.217027
462	NW_005081548.1	1680001	1700000	7	99019.8	0.18722
463	NW_005081548.1	1700001	1720000	6	97143	0.207286
464	NW_005081548.1	1720001	1740000	7	93255.7	0.256965
465	NW_005081548.1	1740001	1760000	6	78488.1	0.525424
466	NW_005081548.1	1760001	1780000	12	79381.8	0.503214
467	NW_005081548.1	1780001	1800000	11	81339.1	0.45938
468	NW_005081548.1	1800001	1820000	7	90771.6	0.290473
469	NW_005081548.1	1820001	1840000	8	94149	0.246445
470	NW_005081548.1	1840001	1860000	6	95200.3	0.232807
471	NW_005081548.1	1860001	1880000	7	95024.1	0.235145
472	NW_005081548.1	1880001	1900000	6	95491.7	0.229106
473	NW_005081548.1	1900001	1920000	9	93308.9	0.255601
474	NW_005081548.1	1920001	1940000	5	88905.8	0.320086
475	NW_005081548.1	1940001	1960000	7	92998.1	0.260666
476	NW_005081548.1	1960001	1980000	8	91685.1	0.2782
477	NW_005081548.1	1980001	2000000	9	101161	0.167543
478	NW_005081548.1	2000001	2020000	7	97172.1	0.206897
479	NW_005081548.1	2020001	2040000	6	101302	0.165206
480	NW_005081548.1	2040001	2060000	8	103473	0.147672
481	NW_005081548.1	2060001	2080000	6	104367	0.138905
482	NW_005081548.1	2080001	2100000	9	88431.3	0.328463
483	NW_005081548.1	2100001	2120000	11	89269	0.31541
484	NW_005081548.1	2120001	2140000	4	90700.5	0.291837
485	NW_005081548.1	2140001	2160000	6	93434.8	0.254432
486	NW_005081548.1	2160001	2180000	9	90149.1	0.300409
487	NW_005081548.1	2180001	2200000	7	89702.1	0.307617
488	NW_005081548.1	2200001	2220000	5	88483.2	0.32632
489	NW_005081548.1	2220001	2240000	7	86628	0.359634
490	NW_005081548.1	2240001	2260000	6	88377.1	0.330021
491	NW_005081548.1	2260001	2280000	7	78396.7	0.527567
492	NW_005081548.1	2280001	2300000	7	82021.4	0.446717
493	NW_005081548.1	2300001	2320000	7	72815.4	0.653029
494	NW_005081548.1	2320001	2340000	13	74479.2	0.617962
495	NW_005081548.1	2340001	2360000	9	81670.6	0.452172
496	NW_005081548.1	2360001	2380000	9	90702.2	0.291642
497	NW_005081548.1	2380001	2400000	8	89747.3	0.306838
498	NW_005081548.1	2400001	2420000	5	90414.8	0.295928
499	NW_005081548.1	2420001	2440000	10	95206.6	0.232613
500	NW_005081548.1	2440001	2460000	10	101311	0.165011
501	NW_005081548.1	2460001	2480000	2	103439	0.148062
502	NW_005081548.1	2480001	2500000	8	106483	0.124099
503	NW_005081548.1	2500001	2520000	8	96953.4	0.211183
504	NW_005081548.1	2520001	2540000	11	100321	0.176505
505	NW_005081548.1	2540001	2560000	4	101713	0.161114
506	NW_005081548.1	2560001	2580000	9	102988	0.152153
507	NW_005081548.1	2580001	2600000	7	98893.9	0.188584
508	NW_005081548.1	2600001	2620000	14	96662.8	0.214494
509	NW_005081548.1	2620001	2640000	13	89231.5	0.316189
510	NW_005081548.1	2640001	2660000	9	90804.2	0.290084
511	NW_005081548.1	2660001	2680000	8	96854.8	0.211962
512	NW_005081548.1	2680001	2700000	11	96696.6	0.2143
513	NW_005081548.1	2700001	2720000	6	96321.9	0.220339
514	NW_005081548.1	2720001	2740000	8	100625	0.172414
515	NW_005081548.1	2740001	2760000	7	90881.1	0.289305
516	NW_005081548.1	2760001	2780000	9	83427.1	0.419443
517	NW_005081548.1	2780001	2800000	11	85623.5	0.376388
518	NW_005081548.1	2800001	2820000	6	86275.6	0.366647
519	NW_005081548.1	2820001	2840000	9	87025.1	0.349893
520	NW_005081548.1	2840001	2860000	11	70767.1	0.691019
521	NW_005081548.1	2860001	2880000	13	69797.6	0.709916
522	NW_005081548.1	2880001	2900000	10	65215.6	0.799727
523	NW_005081548.1	2900001	2920000	18	62771.8	0.83908
524	NW_005081548.1	2920001	2940000	8	81253.6	0.460744
525	NW_005081548.1	2940001	2960000	7	74551.5	0.61543
526	NW_005081548.1	2960001	2980000	4	88437.9	0.327878
527	NW_005081548.1	2980001	3000000	6	79299.3	0.505357
528	NW_005081548.1	3000001	3020000	4	81011	0.46542
529	NW_005081548.1	3020001	3040000	11	84265.6	0.404247
530	NW_005081548.1	3040001	3060000	3	84591.3	0.397818
531	NW_005081548.1	3060001	3080000	12	97498.6	0.203585
532	NW_005081548.1	3080001	3100000	5	102764	0.154101
533	NW_005081548.1	3100001	3120000	3	95808.7	0.224041
534	NW_005081548.1	3120001	3140000	12	94713.8	0.238457
535	NW_005081548.1	3140001	3160000	7	94313.3	0.244496
536	NW_005081548.1	3160001	3180000	7	84131.9	0.407559
537	NW_005081548.1	3180001	3200000	6	86702.8	0.35827
538	NW_005081548.1	3200001	3220000	10	87617.6	0.340542
539	NW_005081548.1	3220001	3240000	6	83228.4	0.422755
540	NW_005081548.1	3240001	3260000	8	85351.3	0.382427
541	NW_005081548.1	3260001	3280000	5	83278.8	0.421196
542	NW_005081548.1	3280001	3300000	8	79592.9	0.496786
543	NW_005081548.1	3300001	3320000	6	84042.7	0.409702
544	NW_005081548.1	3320001	3340000	10	88515.3	0.325443
545	NW_005081548.1	3340001	3360000	5	91205.3	0.285019
546	NW_005081548.1	3360001	3380000	7	99598.3	0.181765
547	NW_005081548.1	3380001	3400000	4	92668.2	0.265342
548	NW_005081548.1	3400001	3420000	10	88205.6	0.332359
549	NW_005081548.1	3420001	3440000	10	80650.4	0.473018
550	NW_005081548.1	3440001	3460000	12	70254.5	0.700175
551	NW_005081548.1	3460001	3480000	7	92212	0.271186
552	NW_005081548.1	3480001	3500000	4	84260.4	0.404442
553	NW_005081548.1	3500001	3520000	7	96972.4	0.210598
554	NW_005081548.1	3520001	3540000	4	97838.4	0.199104
555	NW_005081548.1	3540001	3560000	7	108940	0.107929
556	NW_005081548.1	3560001	3580000	4	107449	0.116501
557	NW_005081548.1	3580001	3600000	1	101359	0.164426
558	NW_005081548.1	3600001	3620000	3	107060	0.119423
559	NW_005081548.1	3620001	3640000	6	112502	0.0880577
560	NW_005081548.1	3640001	3660000	7	88663.2	0.323203
561	NW_005081548.1	3660001	3680000	11	82365.1	0.439899
562	NW_005081548.1	3680001	3700000	11	84454.6	0.40074
563	NW_005081548.1	3700001	3720000	5	87720.1	0.339762
564	NW_005081548.1	3720001	3740000	10	79188.5	0.50789
565	NW_005081548.1	3740001	3760000	3	82247.1	0.442431
566	NW_005081548.1	3760001	3780000	7	101390	0.164037
567	NW_005081548.1	3780001	3800000	8	89272	0.31502
568	NW_005081548.1	3800001	3820000	8	92295.3	0.269823
569	NW_005081548.1	3820001	3840000	7	99687.1	0.180986
570	NW_005081548.1	3840001	3860000	6	95001.3	0.235535
571	NW_005081548.1	3860001	3880000	6	96378	0.21917
572	NW_005081548.1	3880001	3900000	3	91749.7	0.277031
573	NW_005081548.1	3900001	3920000	6	86954.9	0.351062
574	NW_005081548.1	3920001	3940000	5	84398.3	0.402104
575	NW_005081548.1	3940001	3960000	8	89500.5	0.311514
576	NW_005081548.1	3960001	3980000	6	89563.5	0.309955
577	NW_005081548.1	3980001	4000000	5	94603.4	0.240405
578	NW_005081548.1	4000001	4020000	5	97042	0.20904
579	NW_005081548.1	4020001	4040000	7	90327.5	0.296902
580	NW_005081548.1	4040001	4060000	9	84937.2	0.39061
581	NW_005081548.1	4060001	4080000	12	83969.8	0.410871
582	NW_005081548.1	4080001	4100000	6	85292.5	0.383596
583	NW_005081548.1	4100001	4120000	9	76033.3	0.578219
584	NW_005081548.1	4120001	4140000	11	74208.2	0.621274
585	NW_005081548.1	4140001	4160000	12	74469.9	0.618157
586	NW_005081548.1	4160001	4180000	11	81909.4	0.448276
587	NW_005081548.1	4180001	4200000	10	88142.3	0.334113
588	NW_005081548.1	4200001	4220000	9	111775	0.0907851
589	NW_005081548.1	4220001	4240000	4	121096	0.0570816
590	NW_005081548.1	4240001	4260000	9	122161	0.0541594
591	NW_005081548.1	4260001	4280000	6	120850	0.0580557
592	NW_005081548.1	4280001	4300000	6	118699	0.0672122
593	NW_005081548.1	4300001	4320000	4	117166	0.0718878
594	NW_005081548.1	4320001	4340000	6	114201	0.0814339
595	NW_005081548.1	4340001	4360000	11	100291	0.1767
596	NW_005081548.1	4360001	4380000	9	83232.5	0.42256
597	NW_005081548.1	4380001	4400000	6	85501.8	0.378921
598	NW_005081548.1	4400001	4420000	15	79569.2	0.49737
599	NW_005081548.1	4420001	4440000	16	78702.5	0.520943
600	NW_005081548.1	4440001	4460000	7	83844.6	0.413598
601	NW_005081548.1	4460001	4480000	7	91504.7	0.280538
602	NW_005081548.1	4480001	4500000	7	120898	0.0576661
603	NW_005081548.1	4500001	4520000	3	103524	0.147087
604	NW_005081548.1	4520001	4540000	7	104835	0.135204
605	NW_005081548.1	4540001	4560000	2	100785	0.171635
606	NW_005081548.1	4560001	4580000	11	92151.3	0.271966
607	NW_005081548.1	4580001	4600000	4	80772.3	0.470095
608	NW_005081548.1	4600001	4620000	11	69871.8	0.708942
609	NW_005081548.1	4620001	4640000	9	77507.5	0.54549
610	NW_005081548.1	4640001	4660000	10	84367.7	0.403273
611	NW_005081548.1	4660001	4680000	8	79979.9	0.486655
612	NW_005081548.1	4680001	4700000	7	76037.7	0.578025
613	NW_005081548.1	4700001	4720000	10	85387.9	0.382038
614	NW_005081548.1	4720001	4740000	5	83171.8	0.425093
615	NW_005081548.1	4740001	4760000	12	83189.7	0.424313
616	NW_005081548.1	4760001	4780000	6	75263.7	0.596727
617	NW_005081548.1	4780001	4800000	6	91504.8	0.280343
618	NW_005081548.1	4800001	4820000	5	80633.2	0.473602
619	NW_005081548.1	4820001	4840000	8	75541.2	0.589129
620	NW_005081548.1	4840001	4860000	8	78885.9	0.516462
621	NW_005081548.1	4860001	4880000	7	86810.9	0.354179
622	NW_005081548.1	4880001	4900000	6	85571.7	0.377362
623	NW_005081548.1	4900001	4920000	6	92802.7	0.263394
624	NW_005081548.1	4920001	4940000	5	80727.4	0.47107
625	NW_005081548.1	4940001	4960000	7	74222.1	0.620884
626	NW_005081548.1	4960001	4980000	9	76767.2	0.561855
627	NW_005081548.1	4980001	5000000	7	69657.6	0.713618
628	NW_005081548.1	5000001	5020000	13	63509.1	0.827781
629	NW_005081548.1	5020001	5040000	15	67979.5	0.751023
630	NW_005081548.1	5040001	5060000	15	76409.7	0.569842
631	NW_005081548.1	5060001	5080000	11	96351.9	0.219755
632	NW_005081548.1	5080001	5100000	3	99982.6	0.178843
633	NW_005081548.1	5100001	5120000	6	106331	0.125268
634	NW_005081548.1	5120001	5140000	7	103523	0.147282
635	NW_005081548.1	5140001	5160000	10	98784.9	0.189558
636	NW_005081548.1	5160001	5180000	13	99628.2	0.18157
637	NW_005081548.1	5180001	5200000	7	101830	0.160725
638	NW_005081548.1	5200001	5220000	7	106668	0.121956
639	NW_005081548.1	5220001	5240000	6	104165	0.140269
640	NW_005081548.1	5240001	5260000	3	102763	0.154296
641	NW_005081548.1	5260001	5280000	9	92308	0.269433
642	NW_005081548.1	5280001	5300000	9	73969	0.626924
643	NW_005081548.1	5300001	5320000	12	67980.5	0.750828
644	NW_005081548.1	5320001	5340000	13	68335.1	0.74323
645	NW_005081548.1	5340001	5360000	8	67659.2	0.755309
646	NW_005081548.1	5360001	5380000	10	86713	0.35788
647	NW_005081548.1	5380001	5400000	12	92731.2	0.264757
648	NW_005081548.1	5400001	5420000	7	95375.5	0.230859
649	NW_005081548.1	5420001	5440000	6	98821	0.189168
650	NW_005081548.1	5440001	5460000	4	96416.7	0.218391
651	NW_005081548.1	5460001	5480000	10	95770.9	0.22443
652	NW_005081548.1	5480001	5500000	5	88007.4	0.335087
653	NW_005081548.1	5500001	5520000	12	91763.7	0.276447
654	NW_005081548.1	5520001	5540000	10	94090.5	0.247029
655	NW_005081548.1	5540001	5560000	5	100782	0.171829
656	NW_005081548.1	5560001	5580000	8	99008.3	0.187415
657	NW_005081548.1	5580001	5600000	8	101875	0.16053
658	NW_005081548.1	5600001	5620000	9	108994	0.107442
659	NW_005081548.1	5640001	5660000	8	105449	0.130333
660	NW_005081548.1	5660001	5680000	7	98108.4	0.19735
661	NW_005081548.1	5680001	5700000	7	81054	0.464835
662	NW_005081548.1	5700001	5720000	11	77931.4	0.536918
663	NW_005081548.1	5720001	5740000	14	71297.3	0.681473
664	NW_005081548.1	5740001	5760000	10	68103.2	0.747711
665	NW_005081548.1	5760001	5780000	12	71173.8	0.683031
666	NW_005081548.1	5780001	5800000	10	84899.7	0.391292
667	NW_005081548.1	5800001	5820000	5	92880	0.26242
668	NW_005081548.1	5820001	5840000	4	93060.7	0.259497
669	NW_005081548.1	5840001	5860000	11	84134.1	0.407169
670	NW_005081548.1	5860001	5880000	10	90742.2	0.291058
671	NW_005081548.1	5880001	5900000	5	93461.7	0.254042
672	NW_005081548.1	5900001	5920000	3	87399.5	0.344048
673	NW_005081548.1	5920001	5940000	11	85976.6	0.369959
674	NW_005081548.1	5940001	5960000	8	64763.8	0.807423
675	NW_005081548.1	5960001	5980000	13	75827	0.583674
676	NW_005081548.1	5980001	6000000	5	70555.3	0.694331
677	NW_005081548.1	6000001	6020000	6	81466.5	0.456458
678	NW_005081548.1	6020001	6040000	6	80819	0.468537
679	NW_005081548.1	6040001	6060000	14	78750.4	0.519774
680	NW_005081548.1	6060001	6080000	5	79619.5	0.496201
681	NW_005081548.1	6080001	6100000	5	83511.8	0.418079
682	NW_005081548.1	6100001	6120000	6	74505.5	0.617183
683	NW_005081548.1	6120001	6140000	12	66591.1	0.772063
684	NW_005081548.1	6140001	6160000	16	61383.8	0.858367
685	NW_005081548.1	6160001	6180000	11	69591.1	0.715566
686	NW_005081548.1	6180001	6200000	11	73486.4	0.638613
687	NW_005081548.1	6200001	6220000	6	78895.8	0.516072
688	NW_005081548.1	6220001	6240000	10	78696.9	0.521333
689	NW_005081548.1	6240001	6260000	10	79965.6	0.487239
690	NW_005081548.1	6260001	6280000	6	80453.5	0.477109
691	NW_005081548.1	6280001	6300000	15	85885.2	0.372881
692	NW_005081548.1	6300001	6320000	8	79646.1	0.494837
693	NW_005081548.1	6320001	6340000	10	87030.9	0.349698
694	NW_005081548.1	6340001	6360000	10	86125.7	0.368206
695	NW_005081548.1	6360001	6380000	6	85789.8	0.374245
696	NW_005081548.1	6380001	6400000	12	80323.5	0.480616
697	NW_005081548.1	6400001	6420000	2	80189.9	0.483733
698	NW_005081548.1	6420001	6440000	9	85438.8	0.380284
699	NW_005081548.1	6440001	6460000	9	69154.2	0.725112
700	NW_005081548.1	6460001	6480000	8	67833	0.751997
701	NW_005081548.1	6480001	6500000	7	62829.2	0.838301
702	NW_005081548.1	6500001	6520000	14	63706	0.823885
703	NW_005081548.1	6520001	6540000	9	62969.7	0.835963
704	NW_005081548.1	6540001	6560000	13	76413	0.569647
705	NW_005081548.1	6560001	6580000	6	81975.2	0.447497
706	NW_005081548.1	6580001	6600000	11	88476.5	0.32671
707	NW_005081548.1	6600001	6620000	10	85638.6	0.375998
708	NW_005081548.1	6620001	6640000	7	80625.8	0.473797
709	NW_005081548.1	6640001	6660000	7	90812.9	0.289889
710	NW_005081548.1	6660001	6680000	12	93275.4	0.256575
711	NW_005081548.1	6680001	6700000	9	88930.4	0.319696
712	NW_005081548.1	6700001	6720000	7	100501	0.174362
713	NW_005081548.1	6720001	6740000	9	107398	0.116891
714	NW_005081548.1	6740001	6760000	5	108323	0.111046
715	NW_005081548.1	6760001	6780000	9	109070	0.106565
716	NW_005081548.1	6780001	6800000	6	107522	0.116111
717	NW_005081548.1	6800001	6820000	4	103696	0.146113
718	NW_005081548.1	6820001	6840000	9	92960.5	0.260861
719	NW_005081548.1	6840001	6860000	11	81818.5	0.449445
720	NW_005081548.1	6860001	6880000	11	86788.6	0.354958
721	NW_005081548.1	6880001	6900000	13	92134.8	0.272355
722	NW_005081548.1	6900001	6920000	5	105315	0.131892
723	NW_005081548.1	6920001	6940000	8	115591	0.0767582
724	NW_005081548.1	6940001	6960000	4	114831	0.0787064
725	NW_005081548.1	6960001	6980000	9	109989	0.101305
726	NW_005081548.1	6980001	7000000	7	112565	0.0874732
727	NW_005081548.1	7000001	7020000	14	110392	0.0987726
728	NW_005081548.1	7020001	7040000	6	102019	0.159166
729	NW_005081548.1	7040001	7060000	7	98325.3	0.194818
730	NW_005081548.1	7060001	7080000	8	99098.6	0.18683
731	NW_005081548.1	7080001	7100000	8	97060.3	0.20865
732	NW_005081548.1	7100001	7120000	14	107241	0.117865
733	NW_005081548.1	7120001	7140000	5	105718	0.12858
734	NW_005081548.1	7140001	7160000	9	105133	0.13345
735	NW_005081548.1	7160001	7180000	10	100686	0.172219
736	NW_005081548.1	7180001	7200000	4	87568.2	0.341321
737	NW_005081548.1	7200001	7220000	11	88697.5	0.322813
738	NW_005081548.1	7220001	7240000	12	72063.8	0.668615
739	NW_005081548.1	7240001	7260000	11	76184	0.574907
740	NW_005081548.1	7260001	7280000	10	75524.5	0.589908
741	NW_005081548.1	7280001	7300000	16	82208.4	0.4436
742	NW_005081548.1	7300001	7320000	3	83937.4	0.411845
743	NW_005081548.1	7320001	7340000	11	83176.8	0.424703
744	NW_005081548.1	7340001	7360000	11	86833.5	0.353789
745	NW_005081548.1	7360001	7380000	11	93051.3	0.259887
746	NW_005081548.1	7380001	7400000	9	109577	0.104033
747	NW_005081548.1	7400001	7420000	5	108612	0.109098
748	NW_005081548.1	7420001	7440000	6	105917	0.126729
749	NW_005081548.1	7440001	7460000	6	115059	0.0783168
750	NW_005081548.1	7460001	7480000	8	109883	0.102279
751	NW_005081548.1	7480001	7500000	7	111640	0.091954
752	NW_005081548.1	7500001	7520000	5	108356	0.110267
753	NW_005081548.1	7520001	7540000	12	108314	0.111241
754	NW_005081548.1	7540001	7560000	10	100874	0.17105
755	NW_005081548.1	7560001	7580000	5	109062	0.10676
756	NW_005081548.1	7580001	7600000	7	101257	0.165985
757	NW_005081548.1	7600001	7620000	7	101365	0.164231
758	NW_005081548.1	7620001	7640000	6	98448.6	0.193454
759	NW_005081548.1	7640001	7660000	11	96922	0.211377
760	NW_005081548.1	7660001	7680000	12	79954	0.487629
761	NW_005081548.1	7680001	7700000	7	87940.3	0.336645
762	NW_005081548.1	7700001	7720000	14	91394.2	0.282681
763	NW_005081548.1	7720001	7740000	8	97731.6	0.200078
764	NW_005081548.1	7740001	7760000	5	98600.1	0.191701
765	NW_005081548.1	7760001	7780000	6	103924	0.142607
766	NW_005081548.1	7780001	7800000	8	96853.1	0.212351
767	NW_005081548.1	7800001	7820000	4	96537.3	0.215663
768	NW_005081548.1	7820001	7840000	3	98454.5	0.193259
769	NW_005081548.1	7840001	7860000	10	79488.4	0.500292
770	NW_005081548.1	7860001	7880000	11	72379.1	0.661601
771	NW_005081548.1	7880001	7900000	5	57829.5	0.896747
772	NW_005081548.1	7900001	7920000	10	71990.8	0.669589
773	NW_005081548.1	7920001	7940000	12	75331.2	0.595169
774	NW_005081548.1	7940001	7960000	6	75337.6	0.594584
775	NW_005081548.1	7960001	7980000	9	73481.5	0.638808
776	NW_005081548.1	7980001	8000000	8	70102.9	0.702708
777	NW_005081548.1	8000001	8020000	9	84164.2	0.40639
778	NW_005081548.1	8020001	8040000	7	85954.6	0.370738
779	NW_005081548.1	8040001	8060000	9	84889	0.391779
780	NW_005081548.1	8060001	8080000	9	90357	0.296513
781	NW_005081548.1	8080001	8100000	6	92406.9	0.26768
782	NW_005081548.1	8100001	8120000	10	94420.5	0.242938
783	NW_005081548.1	8120001	8140000	12	90919.6	0.28872
784	NW_005081548.1	8140001	8160000	10	91890.4	0.275472
785	NW_005081548.1	8160001	8180000	6	99769.9	0.179622
786	NW_005081548.1	8180001	8200000	8	103082	0.150399
787	NW_005081548.1	8200001	8220000	7	94331.5	0.244107
788	NW_005081548.1	8220001	8240000	4	94567.8	0.24099
789	NW_005081548.1	8240001	8260000	5	99174.1	0.185856
790	NW_005081548.1	8260001	8280000	3	97740.4	0.199883
791	NW_005081548.1	8280001	8300000	6	107671	0.115332
792	NW_005081548.1	8300001	8320000	5	99854.7	0.179038
793	NW_005081548.1	8320001	8340000	9	96254.1	0.221313
794	NW_005081548.1	8340001	8360000	9	83563.9	0.4173
795	NW_005081548.1	8360001	8380000	10	86629.9	0.359439
796	NW_005081548.1	8380001	8400000	8	92682.1	0.265147
797	NW_005081548.1	8400001	8420000	8	89452.5	0.312488
798	NW_005081548.1	8420001	8440000	7	85521.2	0.377947
799	NW_005081548.1	8440001	8460000	11	86680.2	0.35866
800	NW_005081548.1	8460001	8480000	11	94703.3	0.238652
801	NW_005081548.1	8480001	8500000	2	95239.6	0.232028
802	NW_005081548.1	8500001	8520000	10	93356.8	0.255406
803	NW_005081548.1	8520001	8540000	10	90742.9	0.290863
804	NW_005081548.1	8540001	8560000	9	92344.4	0.268849
805	NW_005081548.1	8560001	8580000	6	90907.6	0.28911
806	NW_005081548.1	8580001	8600000	8	96024.6	0.222872
807	NW_005081548.1	8600001	8620000	8	95147.6	0.233392
808	NW_005081548.1	8620001	8640000	8	96954.5	0.210988
809	NW_005081548.1	8640001	8660000	6	98375	0.193649
810	NW_005081548.1	8660001	8680000	8	95916.6	0.223456
811	NW_005081548.1	8680001	8700000	12	89358.8	0.313852
812	NW_005081548.1	8700001	8720000	10	80801.8	0.469121
813	NW_005081548.1	8720001	8740000	11	88257.9	0.33197
814	NW_005081548.1	8740001	8760000	4	86374.1	0.364504
815	NW_005081548.1	8760001	8780000	10	87890.3	0.337619
816	NW_005081548.1	8780001	8800000	8	88497.9	0.325735
817	NW_005081548.1	8800001	8820000	8	86751.4	0.356517
818	NW_005081548.1	8820001	8840000	12	70109.4	0.702513
819	NW_005081548.1	8840001	8860000	8	62019.3	0.850575
820	NW_005081548.1	8860001	8880000	9	66315.6	0.777908
821	NW_005081548.1	8880001	8900000	6	61086.8	0.861485
822	NW_005081548.1	8900001	8920000	14	56077.9	0.912916
823	NW_005081548.1	8920001	8940000	8	56981.1	0.904734
824	NW_005081548.1	8940001	8960000	14	63193.2	0.834015
825	NW_005081548.1	8960001	8980000	9	64199.2	0.816092
826	NW_005081548.1	8980001	9000000	14	84488.9	0.399961
827	NW_005081548.1	9000001	9020000	2	87535.8	0.341516
828	NW_005081548.1	9020001	9040000	8	93291	0.25638
829	NW_005081548.1	9040001	9060000	6	102653	0.15488
830	NW_005081548.1	9060001	9080000	6	110289	0.0995519
831	NW_005081548.1	9080001	9100000	7	120352	0.0600039
832	NW_005081548.1	9100001	9120000	8	103028	0.150984
833	NW_005081548.1	9120001	9140000	10	98357.8	0.194233
834	NW_005081548.1	9140001	9160000	4	95435	0.23008
835	NW_005081548.1	9160001	9180000	8	85971	0.370349
836	NW_005081548.1	9180001	9200000	9	95120	0.233781
837	NW_005081548.1	9200001	9220000	7	99148.3	0.186441
838	NW_005081548.1	9220001	9240000	6	93529.1	0.253263
839	NW_005081548.1	9240001	9260000	1	91875.8	0.275667
840	NW_005081548.1	9260001	9280000	7	92390.4	0.268264
841	NW_005081548.1	9280001	9300000	12	78184.5	0.532242
842	NW_005081548.1	9300001	9320000	9	70784.8	0.690629
843	NW_005081548.1	9320001	9340000	9	74886.8	0.608221
844	NW_005081548.1	9340001	9360000	4	79414.6	0.50263
845	NW_005081548.1	9360001	9380000	9	81201.9	0.461329
846	NW_005081548.1	9380001	9400000	11	80425.2	0.478473
847	NW_005081548.1	9400001	9420000	10	84527.1	0.399182
848	NW_005081548.1	9420001	9440000	7	88520.4	0.325151
849	NW_005081548.1	9440001	9460000	5	85403.7	0.381453
850	NW_005081548.1	9460001	9480000	10	79494.8	0.499903
851	NW_005081548.1	9480001	9500000	13	83333.5	0.420612
852	NW_005081548.1	9500001	9520000	12	79957.3	0.487434
853	NW_005081548.1	9520001	9540000	9	77591.6	0.542957
854	NW_005081548.1	9540001	9560000	10	78887.1	0.516267
855	NW_005081548.1	9560001	9580000	4	74388.9	0.619034
856	NW_005081548.1	9580001	9600000	9	80306.8	0.48081
857	NW_005081548.1	9600001	9620000	19	60746.2	0.864991
858	NW_005081548.1	9620001	9640000	10	61458.3	0.857588
859	NW_005081548.1	9640001	9660000	12	63943.8	0.819988
860	NW_005081548.1	9660001	9680000	9	76470.6	0.568089
861	NW_005081548.1	9680001	9700000	8	73158.8	0.645237
862	NW_005081548.1	9700001	9720000	9	74114.9	0.623612
863	NW_005081548.1	9720001	9740000	10	80362.9	0.479447
864	NW_005081548.1	9740001	9760000	12	85887.2	0.372687
865	NW_005081548.1	9760001	9780000	8	102496	0.156634
866	NW_005081548.1	9780001	9800000	5	103300	0.148841
867	NW_005081548.1	9800001	9820000	8	101535	0.163063
868	NW_005081548.1	9820001	9840000	6	105076	0.133645
869	NW_005081548.1	9840001	9860000	5	105343	0.131697
870	NW_005081548.1	9860001	9880000	6	111658	0.0917592
871	NW_005081548.1	9880001	9900000	7	112871	0.0864991
872	NW_005081548.1	9900001	9920000	7	104114	0.140464
873	NW_005081548.1	9920001	9940000	12	93003	0.260277
874	NW_005081548.1	9940001	9960000	3	83982.4	0.410676
875	NW_005081548.1	9960001	9980000	11	83152.6	0.425287
876	NW_005081548.1	9980001	10000000	8	76857	0.559712
877	NW_005081548.1	10000001	10020000	16	78535	0.524839
878	NW_005081548.1	10020001	10040000	13	68525.6	0.73758
879	NW_005081548.1	10040001	10060000	12	73817.8	0.63121
880	NW_005081548.1	10060001	10080000	5	79405.2	0.502825
881	NW_005081548.1	10080001	10100000	6	80230.9	0.482369
882	NW_005081548.1	10100001	10120000	6	82838.1	0.431911
883	NW_005081548.1	10120001	10140000	5	77564.7	0.543542
884	NW_005081548.1	10140001	10160000	11	77804.9	0.538671
885	NW_005081548.1	10160001	10180000	5	73252.5	0.643678
886	NW_005081548.1	10180001	10200000	12	73102.8	0.646211
887	NW_005081548.1	10200001	10220000	8	73665.9	0.633937
888	NW_005081548.1	10220001	10240000	12	82020	0.446912
889	NW_005081548.1	10240001	10260000	7	94249.4	0.24586
890	NW_005081548.1	10260001	10280000	7	93299.3	0.255796
891	NW_005081548.1	10280001	10300000	10	92897.6	0.261835
892	NW_005081548.1	10300001	10320000	9	78991.6	0.512176
893	NW_005081548.1	10320001	10340000	11	83904.6	0.412624
894	NW_005081548.1	10340001	10360000	14	85952.5	0.370933
895	NW_005081548.1	10360001	10380000	6	79861.9	0.489967
896	NW_005081548.1	10380001	10400000	6	77452.1	0.547438
897	NW_005081548.1	10400001	10420000	21	73644.8	0.634522
898	NW_005081548.1	10420001	10440000	14	71467.9	0.679135
899	NW_005081548.1	10440001	10460000	8	77177.3	0.552698
900	NW_005081548.1	10460001	10480000	10	73407.9	0.640561
901	NW_005081548.1	10480001	10500000	13	68197.7	0.746347
902	NW_005081548.1	10500001	10520000	4	69776.6	0.71128
903	NW_005081548.1	10520001	10540000	15	68425	0.740113
904	NW_005081548.1	10540001	10560000	9	71662.6	0.675433
905	NW_005081548.1	10560001	10580000	15	84896.3	0.391584
906	NW_005081548.1	10580001	10600000	3	81120.9	0.463277
907	NW_005081548.1	10600001	10620000	8	82912.5	0.429963
908	NW_005081548.1	10620001	10640000	9	80252.3	0.481785
909	NW_005081548.1	10640001	10660000	11	72538.6	0.659264
910	NW_005081548.1	10660001	10680000	4	95028.3	0.234756
911	NW_005081548.1	10680001	10700000	3	85245.8	0.384181
912	NW_005081548.1	10700001	10720000	10	84370.5	0.402883
913	NW_005081548.1	10720001	10740000	10	77738.6	0.540814
914	NW_005081548.1	10740001	10760000	7	82451.5	0.439119
915	NW_005081548.1	10760001	10780000	8	87943.4	0.336256
916	NW_005081548.1	10780001	10800000	8	91470.4	0.280927
917	NW_005081548.1	10800001	10820000	12	87649.4	0.340152
918	NW_005081548.1	10820001	10840000	11	98595.1	0.191896
919	NW_005081548.1	10840001	10860000	9	95659	0.226768
920	NW_005081548.1	10860001	10880000	14	84734.8	0.394896
921	NW_005081548.1	10880001	10900000	11	93581	0.252289
922	NW_005081548.1	10900001	10920000	10	95441.9	0.229885
923	NW_005081548.1	10920001	10940000	7	83051.5	0.426846
924	NW_005081548.1	10940001	10960000	8	96120	0.222287
925	NW_005081548.1	10960001	10980000	10	91323.7	0.28346
926	NW_005081548.1	10980001	11000000	10	99452.9	0.182739
927	NW_005081548.1	11000001	11020000	4	102794	0.153516
928	NW_005081548.1	11020001	11040000	6	98579.6	0.19209
929	NW_005081548.1	11040001	11060000	7	101064	0.168907
930	NW_005081548.1	11060001	11080000	9	99156	0.186246
931	NW_005081548.1	11080001	11100000	6	95504.3	0.228911
932	NW_005081548.1	11100001	11120000	8	89774.2	0.306254
933	NW_005081548.1	11120001	11140000	9	83592.7	0.41691
934	NW_005081548.1	11140001	11160000	11	82888.2	0.430547
935	NW_005081548.1	11160001	11180000	5	79002.4	0.511786
936	NW_005081548.1	11180001	11200000	9	74686.2	0.613092
937	NW_005081548.1	11200001	11220000	6	70434.3	0.696084
938	NW_005081548.1	11220001	11240000	9	68914.8	0.730567
939	NW_005081548.1	11240001	11260000	8	79505.6	0.499026
940	NW_005081548.1	11260001	11280000	9	71585.8	0.677382
941	NW_005081548.1	11280001	11300000	8	78613.6	0.522891
942	NW_005081548.1	11300001	11320000	7	86568.4	0.360413
943	NW_005081548.1	11320001	11340000	7	84708	0.395675
944	NW_005081548.1	11340001	11360000	10	90148.8	0.300604
945	NW_005081548.1	11360001	11380000	6	93616.9	0.251899
946	NW_005081548.1	11380001	11400000	7	93624.6	0.251705
947	NW_005081548.1	11400001	11420000	5	86800.3	0.354763
948	NW_005081548.1	11420001	11440000	7	84706.8	0.39587
949	NW_005081548.1	11440001	11460000	8	77067.6	0.555231
950	NW_005081548.1	11460001	11480000	8	62756	0.83947
951	NW_005081548.1	11480001	11500000	2	63259.1	0.832067
952	NW_005081548.1	11500001	11520000	15	68014.9	0.749854
953	NW_005081548.1	11520001	11540000	14	76684.5	0.563803
954	NW_005081548.1	11540001	11560000	5	80264	0.48159
955	NW_005081548.1	11560001	11580000	9	76352.9	0.571401
956	NW_005081548.1	11580001	11600000	4	86673.9	0.358854
957	NW_005081548.1	11600001	11620000	5	72468.8	0.659945
958	NW_005081548.1	11620001	11640000	10	83663.1	0.415741
959	NW_005081548.1	11640001	11660000	10	66055.4	0.782778
960	NW_005081548.1	11660001	11680000	13	60058.1	0.872589
961	NW_005081548.1	11680001	11700000	11	74543.7	0.615624
962	NW_005081548.1	11700001	11720000	9	74200.1	0.621469
963	NW_005081548.1	11720001	11740000	7	82845.2	0.431522
964	NW_005081548.1	11740001	11760000	6	83904.7	0.412429
965	NW_005081548.1	11760001	11780000	12	76994.7	0.556789
966	NW_005081548.1	11780001	11800000	13	71928.6	0.670563
967	NW_005081548.1	11800001	11820000	18	57368.3	0.900838
968	NW_005081548.1	11820001	11840000	6	57045	0.903565
969	NW_005081548.1	11840001	11860000	9	51097.6	0.949542
970	NW_005081548.1	11860001	11880000	13	43694.2	0.977011
971	NW_005081548.1	11880001	11900000	11	38989.3	0.988701
972	NW_005081548.1	11900001	11920000	8	28338.6	0.998052
973	NW_005081620.1	1	20000	5	54929.9	0.922852
974	NW_005081620.1	20001	40000	9	62675.2	0.841223
975	NW_005081620.1	40001	60000	10	66479.1	0.77518
976	NW_005081620.1	60001	80000	13	69643.8	0.714007
977	NW_005081620.1	80001	100000	7	77463.4	0.547243
978	NW_005081620.1	100001	120000	8	77410.5	0.547633
979	NW_005081620.1	120001	140000	8	76471.1	0.567894
980	NW_005081620.1	140001	160000	6	68042.7	0.749075
981	NW_005081620.1	160001	180000	10	63790.5	0.823105
982	NW_005081620.1	180001	200000	10	66482.1	0.774985
983	NW_005081620.1	200001	220000	13	71714	0.674654
984	NW_005081620.1	220001	240000	10	88307.5	0.331385
985	NW_005081620.1	240001	260000	9	93062.6	0.259303
986	NW_005081620.1	260001	280000	5	88911.5	0.319891
987	NW_005081620.1	280001	300000	11	93919.2	0.249172
988	NW_005081620.1	300001	320000	5	96422.7	0.218196
989	NW_005081620.1	320001	340000	6	98740.9	0.189947
990	NW_005081620.1	340001	360000	7	101510	0.163647
991	NW_005081620.1	360001	380000	7	96721	0.21391
992	NW_005081620.1	380001	400000	7	94734.7	0.237873
993	NW_005081620.1	400001	420000	9	81247.9	0.460939
994	NW_005081620.1	420001	440000	11	92879.5	0.262614
995	NW_005081620.1	440001	460000	6	104760	0.135788
996	NW_005081620.1	460001	480000	8	106098	0.126047
997	NW_005081620.1	480001	500000	5	119132	0.0658484
998	NW_005081620.1	500001	520000	4	134769	0.027859
999	NW_005081620.1	520001	540000	4	127685	0.0413014
1000	NW_005081620.1	540001	560000	3	119519	0.0637054
1001	NW_005081620.1	560001	580000	11	125531	0.0463666
1002	NW_005081620.1	580001	600000	5	114663	0.0794857
1003	NW_005081620.1	600001	620000	6	98967.1	0.187804
1004	NW_005081620.1	620001	640000	14	96997.6	0.210014
1005	NW_005081620.1	640001	660000	6	120929	0.0574713
1006	NW_005081620.1	660001	680000	1	121341	0.0563024
1007	NW_005081620.1	680001	700000	3	128888	0.0379895
1008	NW_005081620.1	700001	720000	4	127037	0.0426651
1009	NW_005081620.1	720001	740000	2	118488	0.067894
1010	NW_005081620.1	740001	760000	10	115464	0.0771479
1011	NW_005081620.1	760001	780000	6	109950	0.10189
1012	NW_005081620.1	780001	800000	5	91972.8	0.274498
1013	NW_005081620.1	800001	820000	9	109138	0.106176
1014	NW_005081620.1	820001	840000	5	108347	0.110462
1015	NW_005081620.1	840001	860000	10	103027	0.151179
1016	NW_005081620.1	860001	880000	2	98112.2	0.197156
1017	NW_005081620.1	880001	900000	7	98869.6	0.188778
1018	NW_005081620.1	900001	920000	11	96869.3	0.211767
1019	NW_005081620.1	920001	940000	14	82163.1	0.44438
1020	NW_005081620.1	940001	960000	13	81734	0.450614
1021	NW_005081620.1	960001	980000	10	80879.2	0.467368
1022	NW_005081620.1	980001	1000000	10	79836.6	0.491331
1023	NW_005081620.1	1000001	1020000	10	84725.5	0.395285
1024	NW_005081620.1	1020001	1040000	13	78515.9	0.525034
1025	NW_005081620.1	1040001	1060000	14	80195.9	0.483538
1026	NW_005081620.1	1060001	1080000	5	82841.4	0.431716
1027	NW_005081620.1	1080001	1100000	8	94254.7	0.245665
1028	NW_005081620.1	1100001	1120000	5	105415	0.131112
1029	NW_005081620.1	1120001	1140000	8	107531	0.115722
1030	NW_005081620.1	1140001	1160000	3	110432	0.0985778
1031	NW_005081620.1	1160001	1180000	9	114324	0.0806546
1032	NW_005081620.1	1180001	1200000	5	128071	0.0401325
1033	NW_005081620.1	1200001	1220000	3	128390	0.0391584
1034	NW_005081620.1	1220001	1240000	4	117778	0.0699396
1035	NW_005081620.1	1240001	1260000	10	111561	0.0921488
1036	NW_005081620.1	1260001	1280000	5	106629	0.122638
1037	NW_005081620.1	1280001	1300000	7	100987	0.169297
1038	NW_005081620.1	1300001	1320000	6	108078	0.112605
1039	NW_005081620.1	1320001	1340000	4	97606.4	0.201442
1040	NW_005081620.1	1340001	1360000	8	97334.1	0.204948
1041	NW_005081620.1	1360001	1380000	4	91301.5	0.284044
1042	NW_005081620.1	1380001	1400000	7	89348.9	0.314046
1043	NW_005081620.1	1400001	1420000	9	91667.5	0.27859
1044	NW_005081620.1	1420001	1440000	9	91980.3	0.274304
1045	NW_005081620.1	1440001	1460000	12	80381.8	0.479252
1046	NW_005081620.1	1460001	1480000	7	72603.3	0.657121
1047	NW_005081620.1	1480001	1500000	7	64063.9	0.81804
1048	NW_005081620.1	1500001	1520000	17	62568.6	0.843366
1049	NW_005081620.1	1520001	1540000	13	58671.3	0.888175
1050	NW_005081620.1	1540001	1560000	7	61530.5	0.85564
1051	NW_005081620.1	1560001	1580000	12	64141.2	0.817066
1052	NW_005081620.1	1580001	1600000	11	65675.4	0.789986
1053	NW_005081620.1	1600001	1620000	8	67404	0.759595
1054	NW_005081620.1	1620001	1640000	12	66414.1	0.775765
1055	NW_005081620.1	1640001	1660000	10	67063.3	0.763686
1056	NW_005081620.1	1660001	1680000	5	64430.3	0.812196
1057	NW_005081620.1	1680001	1700000	12	68135.5	0.747321
1058	NW_005081620.1	1700001	1720000	12	75172.2	0.600039
1059	NW_005081620.1	1720001	1740000	12	76749.2	0.562244
1060	NW_005081620.1	1740001	1760000	12	81407.2	0.457822
1061	NW_005081620.1	1760001	1780000	6	76647.2	0.564972
1062	NW_005081620.1	1780001	1800000	11	107969	0.114163
1063	NW_005081620.1	1800001	1820000	7	104251	0.13949
1064	NW_005081620.1	1820001	1840000	11	123918	0.0494837
1065	NW_005081620.1	1840001	1860000	3	125900	0.0457822
1066	NW_005081620.1	1860001	1880000	8	122469	0.0527956
1067	NW_005081620.1	1880001	1900000	2	123407	0.050263
1068	NW_005081620.1	1900001	1920000	6	127549	0.041691
1069	NW_005081620.1	1920001	1940000	3	124540	0.04812
1070	NW_005081620.1	1940001	1960000	8	115333	0.0775375
1071	NW_005081620.1	1960001	1980000	5	98247.9	0.196182
1072	NW_005081620.1	1980001	2000000	8	95624.7	0.227158
1073	NW_005081620.1	2000001	2020000	7	95211.8	0.232418
1074	NW_005081620.1	2020001	2040000	15	96318.8	0.220534
1075	NW_005081620.1	2040001	2060000	8	88328.6	0.33119
1076	NW_005081620.1	2060001	2080000	10	86366.2	0.364699
1077	NW_005081620.1	2080001	2100000	11	81674.1	0.451783
1078	NW_005081620.1	2100001	2120000	3	84583.7	0.398013
1079	NW_005081620.1	2120001	2140000	8	86753.5	0.356322
1080	NW_005081620.1	2140001	2160000	7	85204.9	0.38535
1081	NW_005081620.1	2160001	2180000	7	86658.6	0.359049
1082	NW_005081620.1	2180001	2200000	7	99731.2	0.180207
1083	NW_005081620.1	2200001	2220000	9	99382.3	0.183518
1084	NW_005081620.1	2220001	2240000	8	106157	0.125852
1085	NW_005081620.1	2240001	2260000	6	113440	0.083382
1086	NW_005081620.1	2260001	2280000	6	116588	0.073836
1087	NW_005081620.1	2280001	2300000	4	121755	0.0551335
1088	NW_005081620.1	2300001	2320000	6	117640	0.0703292
1089	NW_005081620.1	2320001	2340000	5	133431	0.0301968
1090	NW_005081620.1	2340001	2360000	4	137748	0.023573
1091	NW_005081620.1	2360001	2380000	6	119804	0.0623417
1092	NW_005081620.1	2380001	2400000	5	110449	0.098383
1093	NW_005081620.1	2400001	2420000	7	100498	0.174557
1094	NW_005081620.1	2420001	2440000	8	101191	0.167349
1095	NW_005081620.1	2440001	2460000	9	103521	0.147477
1096	NW_005081620.1	2460001	2480000	12	102201	0.158192
1097	NW_005081620.1	2480001	2500000	16	95195.3	0.233002
1098	NW_005081620.1	2500001	2520000	10	94035.3	0.248198
1099	NW_005081620.1	2520001	2540000	7	99687.2	0.180791
1100	NW_005081620.1	2540001	2560000	4	107114	0.119229
1101	NW_005081620.1	2560001	2580000	8	106267	0.125658
1102	NW_005081620.1	2580001	2600000	9	106745	0.121372
1103	NW_005081620.1	2600001	2620000	5	104420	0.138321
1104	NW_005081620.1	2620001	2640000	3	98499.2	0.19287
1105	NW_005081620.1	2640001	2660000	11	84132.1	0.407364
1106	NW_005081620.1	2660001	2680000	6	81564.7	0.45451
1107	NW_005081620.1	2680001	2700000	8	77519.9	0.544906
1108	NW_005081620.1	2700001	2720000	10	64334.5	0.814923
1109	NW_005081620.1	2720001	2740000	8	66938.3	0.766413
1110	NW_005081620.1	2740001	2760000	12	64825.5	0.805767
1111	NW_005081620.1	2760001	2780000	8	70064.9	0.703877
1112	NW_005081620.1	2780001	2800000	13	72344.2	0.662381
1113	NW_005081620.1	2800001	2820000	9	69606.1	0.715371
1114	NW_005081620.1	2820001	2840000	10	61107.5	0.8609
1115	NW_005081620.1	2840001	2860000	7	56350.2	0.910773
1116	NW_005081620.1	2860001	2880000	14	52715.5	0.939412
1117	NW_005081620.1	2880001	2900000	12	63239.7	0.832651
1118	NW_005081620.1	2900001	2920000	7	63813.4	0.821936
1119	NW_005081620.1	2920001	2940000	7	53833	0.931424
1120	NW_005081620.1	2940001	2960000	16	58374.3	0.890318
1121	NW_005081620.1	2960001	2980000	9	70390	0.697058
1122	NW_005081620.1	2980001	3000000	5	66715	0.76992
1123	NW_005081620.1	3000001	3020000	8	75430.9	0.592636
1124	NW_005081620.1	3020001	3040000	7	75646.9	0.586986
1125	NW_005081620.1	3040001	3060000	11	74048.5	0.624781
1126	NW_005081620.1	3060001	3080000	11	67553.4	0.756867
1127	NW_005081620.1	3080001	3100000	6	63533.9	0.826807
1128	NW_005081620.1	3100001	3120000	5	61878.7	0.851744
1129	NW_005081620.1	3120001	3140000	10	54551	0.926554
1130	NW_005081620.1	3140001	3160000	4	54037.5	0.929866
1131	NW_005081620.1	3160001	3180000	11	45501	0.970972
1132	NW_005081620.1	3180001	3200000	5	32914.1	0.995909
1133	NW_005081699.1	1160001	1180000	1	32840.6	0.996104
1134	NW_005081699.1	1140001	1160000	7	39065	0.988506
1135	NW_005081699.1	1120001	1140000	4	49228.3	0.959673
1136	NW_005081699.1	1100001	1120000	10	60073.2	0.872199
1137	NW_005081699.1	1080001	1100000	6	70019.2	0.705046
1138	NW_005081699.1	1060001	1080000	7	65986	0.784726
1139	NW_005081699.1	1040001	1060000	15	73553.7	0.636762
1140	NW_005081699.1	1020001	1040000	5	86570.7	0.360218
1141	NW_005081699.1	1000001	1020000	7	96413.2	0.218586
1142	NW_005081699.1	980001	1000000	5	86755.9	0.355932
1143	NW_005081699.1	960001	980000	8	90746.4	0.290668
1144	NW_005081699.1	940001	960000	9	87253.7	0.346386
1145	NW_005081699.1	920001	940000	14	84493.3	0.399766
1146	NW_005081699.1	900001	920000	2	81856.3	0.449055
1147	NW_005081699.1	880001	900000	12	78261.8	0.530879
1148	NW_005081699.1	860001	880000	9	75533.9	0.589519
1149	NW_005081699.1	840001	860000	15	75424.6	0.592831
1150	NW_005081699.1	820001	840000	5	73494.1	0.638418
1151	NW_005081699.1	800001	820000	7	81502.4	0.455874
1152	NW_005081699.1	780001	800000	10	73900.2	0.629262
1153	NW_005081699.1	760001	780000	6	78233.6	0.531658
1154	NW_005081699.1	740001	760000	8	76607.6	0.565751
1155	NW_005081699.1	720001	740000	16	70808	0.690045
1156	NW_005081699.1	700001	720000	7	69883	0.708358
1157	NW_005081699.1	680001	700000	10	64025.5	0.819014
1158	NW_005081699.1	660001	680000	12	57515.8	0.900058
1159	NW_005081699.1	640001	660000	14	62309.4	0.847068
1160	NW_005081699.1	620001	640000	6	63138.4	0.8346
1161	NW_005081699.1	600001	620000	8	72634.3	0.656341
1162	NW_005081699.1	580001	600000	6	69624.3	0.714592
1163	NW_005081699.1	560001	580000	6	73648.4	0.634327
1164	NW_005081699.1	540001	560000	13	74327.4	0.620105
1165	NW_005081699.1	520001	540000	11	74516.9	0.616793
1166	NW_005081699.1	500001	520000	14	68193.9	0.746542
1167	NW_005081699.1	480001	500000	11	61088.2	0.86129
1168	NW_005081699.1	460001	480000	8	62661.7	0.841613
1169	NW_005081699.1	440001	460000	10	59315.6	0.880187
1170	NW_005081699.1	420001	440000	12	58094.6	0.89285
1171	NW_005081699.1	400001	420000	12	62641	0.842198
1172	NW_005081699.1	380001	400000	7	68616.6	0.735437
1173	NW_005081699.1	360001	380000	12	64729.5	0.808494
1174	NW_005081699.1	340001	360000	13	71144	0.684005
1175	NW_005081699.1	320001	340000	11	68462.8	0.739139
1176	NW_005081699.1	300001	320000	3	72468.8	0.659945
1177	NW_005081699.1	280001	300000	4	73637.3	0.635106
1178	NW_005081699.1	260001	280000	14	75332.3	0.594974
1179	NW_005081699.1	240001	260000	3	74940.8	0.606468
1180	NW_005081699.1	220001	240000	5	80583.8	0.474381
1181	NW_005081699.1	200001	220000	16	69162.3	0.724528
1182	NW_005081699.1	180001	200000	11	67279.8	0.760374
1183	NW_005081699.1	160001	180000	9	70304.7	0.699396
1184	NW_005081699.1	140001	160000	7	64975.5	0.803039
1185	NW_005081699.1	120001	140000	7	75449.4	0.592441
1186	NW_005081699.1	100001	120000	8	72940.1	0.650107
1187	NW_005081699.1	80001	100000	4	76096.1	0.576271
1188	NW_005081699.1	60001	80000	7	84842.1	0.392753
1189	NW_005081699.1	40001	60000	6	76397.4	0.570232
1190	NW_005081699.1	20001	40000	13	73381.3	0.64134
1191	NW_005081699.1	1	20000	11	53232.8	0.935515
1192	NW_005081574.1	5680001	5700000	3	20194.4	0.999416
1193	NW_005081574.1	5660001	5680000	9	33647.7	0.99513
1194	NW_005081574.1	5640001	5660000	9	40748.4	0.984999
1195	NW_005081574.1	5620001	5640000	12	49077.9	0.961036
1196	NW_005081574.1	5600001	5620000	7	47436.3	0.965907
1197	NW_005081574.1	5580001	5600000	11	64763.8	0.807423
1198	NW_005081574.1	5560001	5580000	9	73148.3	0.645432
1199	NW_005081574.1	5540001	5560000	8	69609.4	0.715176
1200	NW_005081574.1	5520001	5540000	8	74619.4	0.613871
1201	NW_005081574.1	5500001	5520000	7	75841.8	0.58309
1202	NW_005081574.1	5480001	5500000	10	80406.5	0.478667
1203	NW_005081574.1	5460001	5480000	4	85309	0.383207
1204	NW_005081574.1	5440001	5460000	4	86514.5	0.361387
1205	NW_005081574.1	5420001	5440000	5	87455	0.342879
1206	NW_005081574.1	5400001	5420000	10	79360	0.503994
1207	NW_005081574.1	5380001	5400000	14	72989.5	0.649133
1208	NW_005081574.1	5360001	5380000	9	66853.6	0.767972
1209	NW_005081574.1	5340001	5360000	15	67494	0.758231
1210	NW_005081574.1	5320001	5340000	8	77300.1	0.55036
1211	NW_005081574.1	5300001	5320000	10	95396.6	0.230664
1212	NW_005081574.1	5280001	5300000	6	79861.2	0.490162
1213	NW_005081574.1	5260001	5280000	7	81797.9	0.449834
1214	NW_005081574.1	5240001	5260000	7	82634.6	0.435418
1215	NW_005081574.1	5220001	5240000	7	83962.7	0.411066
1216	NW_005081574.1	5200001	5220000	8	81134.6	0.462887
1217	NW_005081574.1	5180001	5200000	11	76425.6	0.569258
1218	NW_005081574.1	5160001	5180000	8	89173.7	0.316969
1219	NW_005081574.1	5140001	5160000	7	84167.2	0.406195
1220	NW_005081574.1	5120001	5140000	9	77920	0.537308
1221	NW_005081574.1	5100001	5120000	10	73953.2	0.628093
1222	NW_005081574.1	5080001	5100000	5	64367.3	0.814144
1223	NW_005081574.1	5060001	5080000	9	75185.9	0.599455
1224	NW_005081574.1	5040001	5060000	6	74886.1	0.608416
1225	NW_005081574.1	5020001	5040000	8	77498.5	0.54588
1226	NW_005081574.1	5000001	5020000	14	74020	0.62556
1227	NW_005081574.1	4980001	5000000	5	73982.3	0.626339
1228	NW_005081574.1	4960001	4980000	3	74648.8	0.613481
1229	NW_005081574.1	4940001	4960000	11	76901.9	0.558153
1230	NW_005081574.1	4920001	4940000	10	77181	0.552503
1231	NW_005081574.1	4900001	4920000	5	88150.1	0.333723
1232	NW_005081574.1	4880001	4900000	15	81651.8	0.452757
1233	NW_005081574.1	4860001	4880000	7	79632.1	0.495422
1234	NW_005081574.1	4840001	4860000	8	82090.9	0.445548
1235	NW_005081574.1	4820001	4840000	7	77132.9	0.553477
1236	NW_005081574.1	4800001	4820000	8	79431.5	0.502046
1237	NW_005081574.1	4780001	4800000	7	86065.2	0.368595
1238	NW_005081574.1	4760001	4780000	12	64058.2	0.818235
1239	NW_005081574.1	4740001	4760000	10	69517.2	0.717709
1240	NW_005081574.1	4720001	4740000	9	71734.8	0.674459
1241	NW_005081574.1	4700001	4720000	10	75642	0.587181
1242	NW_005081574.1	4680001	4700000	10	70167.5	0.701734
1243	NW_005081574.1	4660001	4680000	8	70781.7	0.690824
1244	NW_005081574.1	4640001	4660000	11	65116.7	0.801481
1245	NW_005081574.1	4620001	4640000	8	76142.5	0.575297
1246	NW_005081574.1	4600001	4620000	3	80849.3	0.467758
1247	NW_005081574.1	4580001	4600000	16	81169.4	0.462303
1248	NW_005081574.1	4560001	4580000	10	79205.5	0.5075
1249	NW_005081574.1	4540001	4560000	8	80724	0.471459
1250	NW_005081574.1	4520001	4540000	8	89912.8	0.303721
1251	NW_005081574.1	4500001	4520000	7	100523	0.173972
1252	NW_005081574.1	4480001	4500000	6	95157.1	0.233197
1253	NW_005081574.1	4460001	4480000	5	91451.5	0.281512
1254	NW_005081574.1	4440001	4460000	9	88160.1	0.333333
1255	NW_005081574.1	4420001	4440000	10	94928.1	0.236314
1256	NW_005081574.1	4400001	4420000	11	100929	0.169881
1257	NW_005081574.1	4380001	4400000	7	83226.4	0.42295
1258	NW_005081574.1	4360001	4380000	9	80499.3	0.47594
1259	NW_005081574.1	4340001	4360000	9	81044.9	0.46503
1260	NW_005081574.1	4320001	4340000	8	84782.2	0.393142
1261	NW_005081574.1	4300001	4320000	10	90023.6	0.301968
1262	NW_005081574.1	4280001	4300000	7	92157.8	0.271771
1263	NW_005081574.1	4260001	4280000	2	85504.9	0.378726
1264	NW_005081574.1	4240001	4260000	14	93246.8	0.25716
1265	NW_005081574.1	4220001	4240000	10	93937.7	0.248977
1266	NW_005081574.1	4200001	4220000	5	98020.1	0.197935
1267	NW_005081574.1	4180001	4200000	5	97696.9	0.200662
1268	NW_005081574.1	4160001	4180000	7	94610.6	0.240016
1269	NW_005081574.1	4140001	4160000	13	84218.6	0.405611
1270	NW_005081574.1	4120001	4140000	9	94565	0.241184
1271	NW_005081574.1	4100001	4120000	9	98908	0.188389
1272	NW_005081574.1	4080001	4100000	4	99196	0.185077
1273	NW_005081574.1	4060001	4080000	3	102148	0.158387
1274	NW_005081574.1	4040001	4060000	3	96299.7	0.220729
1275	NW_005081574.1	4020001	4040000	8	102352	0.157802
1276	NW_005081574.1	4000001	4020000	4	94700.4	0.238847
1277	NW_005081574.1	3980001	4000000	2	96061	0.222677
1278	NW_005081574.1	3960001	3980000	9	89462.3	0.312293
1279	NW_005081574.1	3940001	3960000	7	85945.5	0.371128
1280	NW_005081574.1	3920001	3940000	16	80540.6	0.475356
1281	NW_005081574.1	3900001	3920000	8	65359.3	0.795246
1282	NW_005081574.1	3880001	3900000	8	75185.1	0.599649
1283	NW_005081574.1	3860001	3880000	9	78381.5	0.528346
1284	NW_005081574.1	3840001	3860000	12	80973	0.466004
1285	NW_005081574.1	3820001	3840000	6	83438.1	0.419053
1286	NW_005081574.1	3800001	3820000	7	85594.2	0.376778
1287	NW_005081574.1	3780001	3800000	11	87761.8	0.339373
1288	NW_005081574.1	3760001	3780000	11	103085	0.150205
1289	NW_005081574.1	3740001	3760000	4	108091	0.11241
1290	NW_005081574.1	3720001	3740000	5	109656	0.103448
1291	NW_005081574.1	3700001	3720000	6	104734	0.135983
1292	NW_005081574.1	3680001	3700000	9	100980	0.169492
1293	NW_005081574.1	3660001	3680000	6	95032	0.234561
1294	NW_005081574.1	3640001	3660000	13	106591	0.123222
1295	NW_005081574.1	3620001	3640000	3	104999	0.134619
1296	NW_005081574.1	3600001	3620000	7	111884	0.089811
1297	NW_005081574.1	3580001	3600000	5	102580	0.15527
1298	NW_005081574.1	3560001	3580000	9	94479	0.241964
1299	NW_005081574.1	3540001	3560000	14	78905.8	0.514904
1300	NW_005081574.1	3520001	3540000	5	88645.8	0.323982
1301	NW_005081574.1	3500001	3520000	8	95366.9	0.231054
1302	NW_005081574.1	3480001	3500000	4	94875.3	0.237093
1303	NW_005081574.1	3460001	3480000	11	93671.6	0.25112
1304	NW_005081574.1	3440001	3460000	12	81515.7	0.455289
1305	NW_005081574.1	3420001	3440000	7	82412.9	0.439509
1306	NW_005081574.1	3400001	3420000	5	83639.9	0.416326
1307	NW_005081574.1	3380001	3400000	6	82604.1	0.436392
1308	NW_005081574.1	3360001	3380000	19	79315.2	0.504968
1309	NW_005081574.1	3340001	3360000	4	84754.9	0.394117
1310	NW_005081574.1	3320001	3340000	5	81125.3	0.463082
1311	NW_005081574.1	3300001	3320000	8	86207	0.367621
1312	NW_005081574.1	3280001	3300000	12	86235.2	0.367232
1313	NW_005081574.1	3260001	3280000	9	79621.3	0.495811
1314	NW_005081574.1	3240001	3260000	10	76421.2	0.569453
1315	NW_005081574.1	3220001	3240000	15	65354.2	0.795441
1316	NW_005081574.1	3200001	3220000	14	66543.4	0.773622
1317	NW_005081574.1	3180001	3200000	10	68665.8	0.734853
1318	NW_005081574.1	3160001	3180000	12	73314.6	0.642704
1319	NW_005081574.1	3140001	3160000	10	73571.4	0.636275
1320	NW_005081574.1	3120001	3140000	6	74490.1	0.617378
1321	NW_005081574.1	3100001	3120000	14	72233.5	0.665303
1322	NW_005081574.1	3080001	3100000	12	59942.3	0.874148
1323	NW_005081574.1	3060001	3080000	11	64850.3	0.804598
1324	NW_005081574.1	3040001	3060000	11	66169.6	0.780051
1325	NW_005081574.1	3020001	3040000	6	69440.6	0.719462
1326	NW_005081574.1	3000001	3020000	9	63921.4	0.820573
1327	NW_005081574.1	2980001	3000000	10	68243.6	0.745373
1328	NW_005081574.1	2960001	2980000	12	75836.5	0.583285
1329	NW_005081574.1	2940001	2960000	8	81983.6	0.447302
1330	NW_005081574.1	2920001	2940000	8	70554.8	0.694526
1331	NW_005081574.1	2900001	2920000	9	73396.8	0.641146
1332	NW_005081574.1	2880001	2900000	11	70701.8	0.692383
1333	NW_005081574.1	2860001	2880000	13	83472.4	0.418469
1334	NW_005081574.1	2840001	2860000	5	84095	0.408338
1335	NW_005081574.1	2820001	2840000	11	85419.8	0.380674
1336	NW_005081574.1	2800001	2820000	3	85912.6	0.371907
1337	NW_005081574.1	2780001	2800000	10	96975.9	0.210403
1338	NW_005081574.1	2760001	2780000	6	94456.2	0.242353
1339	NW_005081574.1	2740001	2760000	13	94985	0.23573
1340	NW_005081574.1	2720001	2740000	10	102243	0.157997
1341	NW_005081574.1	2700001	2720000	6	75951.1	0.580362
1342	NW_005081574.1	2680001	2700000	11	87167.2	0.347555
1343	NW_005081574.1	2660001	2680000	4	90582.5	0.293785
1344	NW_005081574.1	2640001	2660000	12	93517.6	0.253653
1345	NW_005081574.1	2620001	2640000	6	94027.5	0.248393
1346	NW_005081574.1	2600001	2620000	7	96520.6	0.216053
1347	NW_005081574.1	2580001	2600000	7	98716.9	0.190337
1348	NW_005081574.1	2560001	2580000	6	103752	0.144555
1349	NW_005081574.1	2540001	2560000	14	103049	0.150789
1350	NW_005081574.1	2520001	2540000	9	96373.8	0.21956
1351	NW_005081574.1	2500001	2520000	12	84749.5	0.394506
1352	NW_005081574.1	2480001	2500000	8	77491.3	0.546269
1353	NW_005081574.1	2460001	2480000	12	86359.4	0.364894
1354	NW_005081574.1	2440001	2460000	7	82800.8	0.43269
1355	NW_005081574.1	2420001	2440000	12	77404.5	0.547828
1356	NW_005081574.1	2400001	2420000	5	85976.3	0.370154
1357	NW_005081574.1	2380001	2400000	7	85409.8	0.381064
1358	NW_005081574.1	2360001	2380000	12	80499.9	0.475745
1359	NW_005081574.1	2340001	2360000	14	87610.7	0.340736
1360	NW_005081574.1	2320001	2340000	3	90930.6	0.288525
1361	NW_005081574.1	2300001	2320000	10	89835.7	0.3045
1362	NW_005081574.1	2280001	2300000	6	82219.6	0.443405
1363	NW_005081574.1	2260001	2280000	12	81172.7	0.462108
1364	NW_005081574.1	2240001	2260000	11	80230.7	0.482564
1365	NW_005081574.1	2220001	2240000	9	81138.1	0.462692
1366	NW_005081574.1	2200001	2220000	18	80485.6	0.476135
1367	NW_005081574.1	2180001	2200000	6	86731.3	0.357101
1368	NW_005081574.1	2160001	2180000	9	92265.1	0.270212
1369	NW_005081574.1	2140001	2160000	3	88825.2	0.321547
1370	NW_005081574.1	2120001	2140000	8	90931.7	0.28833
1371	NW_005081574.1	2100001	2120000	9	98307	0.195402
1372	NW_005081574.1	2080001	2100000	4	95212.5	0.232223
1373	NW_005081574.1	2060001	2080000	8	95516.7	0.228716
1374	NW_005081574.1	2040001	2060000	11	83147.1	0.425677
1375	NW_005081574.1	2020001	2040000	9	83021.6	0.427625
1376	NW_005081574.1	2000001	2020000	10	80188.7	0.483928
1377	NW_005081574.1	1980001	2000000	8	78903.4	0.515098
1378	NW_005081574.1	1960001	1980000	8	84070.5	0.409117
1379	NW_005081574.1	1940001	1960000	7	86302	0.365868
1380	NW_005081574.1	1920001	1940000	10	85750.2	0.375219
1381	NW_005081574.1	1900001	1920000	9	84429.6	0.40113
1382	NW_005081574.1	1880001	1900000	12	65310.2	0.795831
1383	NW_005081574.1	1860001	1880000	12	64413.8	0.812585
1384	NW_005081574.1	1840001	1860000	15	67644.2	0.755893
1385	NW_005081574.1	1820001	1840000	13	80439.3	0.477499
1386	NW_005081574.1	1800001	1820000	6	79145.5	0.508669
1387	NW_005081574.1	1780001	1800000	13	75214.2	0.598091
1388	NW_005081574.1	1760001	1780000	10	51003.1	0.950906
1389	NW_005081574.1	1740001	1760000	16	57511.8	0.900253
1390	NW_005081574.1	1720001	1740000	12	64966.3	0.803234
1391	NW_005081574.1	1700001	1720000	10	71253	0.681862
1392	NW_005081574.1	1680001	1700000	8	76918.1	0.557763
1393	NW_005081574.1	1660001	1680000	8	75192.3	0.59887
1394	NW_005081574.1	1640001	1660000	9	69792.9	0.710111
1395	NW_005081574.1	1620001	1640000	12	70141	0.702124
1396	NW_005081574.1	1600001	1620000	7	81433.3	0.456848
1397	NW_005081574.1	1580001	1600000	10	70837.2	0.68946
1398	NW_005081574.1	1560001	1580000	11	72513.4	0.659458
1399	NW_005081574.1	1540001	1560000	9	72311.3	0.663744
1400	NW_005081574.1	1520001	1540000	9	75828.8	0.583479
1401	NW_005081574.1	1500001	1520000	8	68481.6	0.738554
1402	NW_005081574.1	1480001	1500000	12	64518.2	0.811027
1403	NW_005081574.1	1460001	1480000	12	62828.7	0.838496
1404	NW_005081574.1	1440001	1460000	13	62695.6	0.840834
1405	NW_005081574.1	1420001	1440000	5	75330.5	0.595363
1406	NW_005081574.1	1400001	1420000	7	86807.4	0.354374
1407	NW_005081574.1	1380001	1400000	6	93357.3	0.255211
1408	NW_005081574.1	1360001	1380000	8	89796.9	0.305474
1409	NW_005081574.1	1340001	1360000	9	77480.3	0.546464
1410	NW_005081574.1	1320001	1340000	18	73432.6	0.639977
1411	NW_005081574.1	1300001	1320000	4	69115.2	0.725696
1412	NW_005081574.1	1280001	1300000	14	71788.9	0.673096
1413	NW_005081574.1	1260001	1280000	9	66716.1	0.769725
1414	NW_005081574.1	1240001	1260000	11	73553.7	0.636762
1415	NW_005081574.1	1220001	1240000	5	69855.6	0.709332
1416	NW_005081574.1	1200001	1220000	9	84396.6	0.402299
1417	NW_005081574.1	1180001	1200000	9	64184.3	0.816287
1418	NW_005081574.1	1160001	1180000	10	64404.9	0.813365
1419	NW_005081574.1	1140001	1160000	14	64427.3	0.81239
1420	NW_005081574.1	1120001	1140000	11	51354.7	0.946815
1421	NW_005081574.1	1100001	1120000	7	70002.5	0.70563
1422	NW_005081574.1	1080001	1100000	10	72366.9	0.661796
1423	NW_005081574.1	1060001	1080000	2	75764.6	0.585233
1424	NW_005081574.1	1040001	1060000	9	69695.5	0.712644
1425	NW_005081574.1	1020001	1040000	9	67305.6	0.760179
1426	NW_005081574.1	1000001	1020000	10	63799.7	0.822716
1427	NW_005081574.1	980001	1000000	10	75802.4	0.584259
1428	NW_005081574.1	960001	980000	8	78792.8	0.5188
1429	NW_005081574.1	940001	960000	8	75136.4	0.600623
1430	NW_005081574.1	920001	940000	9	76152.7	0.575102
1431	NW_005081574.1	900001	920000	8	75906.3	0.580947
1432	NW_005081574.1	880001	900000	12	53385	0.934152
1433	NW_005081574.1	860001	880000	11	51035.1	0.950516
1434	NW_005081574.1	840001	860000	7	53907.9	0.93045
1435	NW_005081574.1	820001	840000	9	56533.4	0.908825
1436	NW_005081574.1	800001	820000	15	63128.5	0.834794
1437	NW_005081574.1	780001	800000	5	70682.8	0.692967
1438	NW_005081574.1	760001	780000	9	75874.6	0.581921
1439	NW_005081574.1	740001	760000	11	81092.4	0.463861
1440	NW_005081574.1	720001	740000	9	82903.9	0.430158
1441	NW_005081574.1	700001	720000	8	84099.2	0.408143
1442	NW_005081574.1	680001	700000	9	78563.5	0.52406
1443	NW_005081574.1	660001	680000	11	88074.3	0.334502
1444	NW_005081574.1	640001	660000	6	90572.3	0.29398
1445	NW_005081574.1	620001	640000	9	90610.3	0.293396
1446	NW_005081574.1	600001	620000	5	96619.3	0.214884
1447	NW_005081574.1	580001	600000	12	103879	0.142996
1448	NW_005081574.1	560001	580000	9	97425.6	0.204364
1449	NW_005081574.1	540001	560000	9	102992	0.151958
1450	NW_005081574.1	520001	540000	6	111511	0.0923437
1451	NW_005081574.1	500001	520000	10	123157	0.0504578
1452	NW_005081574.1	480001	500000	2	120872	0.0578609
1453	NW_005081574.1	460001	480000	3	121764	0.0549386
1454	NW_005081574.1	440001	460000	5	118875	0.0664329
1455	NW_005081574.1	420001	440000	4	118858	0.0666277
1456	NW_005081574.1	400001	420000	16	103721	0.145626
1457	NW_005081574.1	380001	400000	18	87333.3	0.345217
1458	NW_005081574.1	360001	380000	10	74898	0.607442
1459	NW_005081574.1	340001	360000	5	65338.5	0.795636
1460	NW_005081574.1	320001	340000	16	65569.5	0.79174
1461	NW_005081574.1	300001	320000	10	61465.2	0.857004
1462	NW_005081574.1	280001	300000	6	66603.5	0.771284
1463	NW_005081574.1	260001	280000	14	53883.8	0.930645
1464	NW_005081574.1	240001	260000	8	58995.6	0.883499
1465	NW_005081574.1	220001	240000	10	60157.9	0.87142
1466	NW_005081574.1	200001	220000	9	73937.2	0.628482
1467	NW_005081574.1	180001	200000	5	73573.2	0.63608
1468	NW_005081574.1	160001	180000	3	85955.1	0.370544
1469	NW_005081574.1	140001	160000	10	82794.9	0.432885
1470	NW_005081574.1	120001	140000	12	69515.1	0.717904
1471	NW_005081574.1	100001	120000	11	61703.3	0.853692
1472	NW_005081574.1	80001	100000	4	50754	0.952075
1473	NW_005081574.1	60001	80000	5	49501.8	0.958893
1474	NW_005081844.1	260001	280000	8	57055.4	0.90337
1475	NW_005081844.1	240001	260000	4	74529.9	0.616404
1476	NW_005081844.1	220001	240000	7	75134.3	0.600818
1477	NW_005081844.1	200001	220000	8	75325.1	0.595558
1478	NW_005081844.1	180001	200000	7	79174.1	0.50828
1479	NW_005081844.1	160001	180000	18	75122.9	0.601403
1480	NW_005081844.1	140001	160000	7	85121.5	0.386713
1481	NW_005081844.1	120001	140000	9	89438.2	0.312683
1482	NW_005081844.1	100001	120000	6	92400.5	0.268069
1483	NW_005081844.1	80001	100000	4	82955.2	0.429184
1484	NW_005081844.1	60001	80000	9	77404.1	0.548023
1485	NW_005081844.1	40001	60000	16	48552.1	0.9624
1486	NW_005081844.1	20001	40000	13	37461.2	0.991038
1487	NW_005081844.1	1	20000	18	32086.1	0.996883
1488	NW_005081653.1	2020001	2040000	1	20445.1	0.999221
1489	NW_005081653.1	2000001	2020000	16	40236.9	0.985973
1490	NW_005081653.1	1980001	2000000	7	53817.3	0.931619
1491	NW_005081653.1	1960001	1980000	10	78481.5	0.525813
1492	NW_005081653.1	1940001	1960000	5	77134	0.553283
1493	NW_005081653.1	1920001	1940000	13	77515.4	0.5451
1494	NW_005081653.1	1900001	1920000	6	76743.7	0.562439
1495	NW_005081653.1	1880001	1900000	9	72314.1	0.66355
1496	NW_005081653.1	1860001	1880000	14	73904.2	0.629067
1497	NW_005081653.1	1840001	1860000	7	71608.6	0.677187
1498	NW_005081653.1	1820001	1840000	6	84002.3	0.410286
1499	NW_005081653.1	1800001	1820000	8	78544.3	0.52445
1500	NW_005081653.1	1780001	1800000	9	83849.8	0.413403
1501	NW_005081653.1	1760001	1780000	7	81503.2	0.455679
1502	NW_005081653.1	1740001	1760000	12	78314.1	0.52971
1503	NW_005081653.1	1720001	1740000	11	75064.9	0.603741
1504	NW_005081653.1	1700001	1720000	13	85240.4	0.384376
1505	NW_005081653.1	1680001	1700000	5	89627.5	0.309176
1506	NW_005081653.1	1660001	1680000	5	87298	0.345412
1507	NW_005081653.1	1640001	1660000	3	96266.4	0.221118
1508	NW_005081653.1	1620001	1640000	10	95664.4	0.226378
1509	NW_005081653.1	1600001	1620000	5	91751.3	0.276836
1510	NW_005081653.1	1580001	1600000	7	100900	0.170271
1511	NW_005081653.1	1560001	1580000	7	103811	0.143581
1512	NW_005081653.1	1540001	1560000	2	102501	0.156439
1513	NW_005081653.1	1520001	1540000	13	92108.7	0.27294
1514	NW_005081653.1	1500001	1520000	6	86510.5	0.361582
1515	NW_005081653.1	1480001	1500000	11	71910.1	0.671147
1516	NW_005081653.1	1460001	1480000	16	70231.6	0.70037
1517	NW_005081653.1	1440001	1460000	3	55737.1	0.917008
1518	NW_005081653.1	1420001	1440000	14	74342.5	0.619716
1519	NW_005081653.1	1400001	1420000	10	86404.1	0.363335
1520	NW_005081653.1	1380001	1400000	4	85040	0.388467
1521	NW_005081653.1	1360001	1380000	8	84770.5	0.393337
1522	NW_005081653.1	1340001	1360000	6	86966.8	0.350867
1523	NW_005081653.1	1320001	1340000	15	96489.5	0.217222
1524	NW_005081653.1	1300001	1320000	1	97842.6	0.198909
1525	NW_005081653.1	1280001	1300000	5	98666.5	0.190921
1526	NW_005081653.1	1260001	1280000	6	87942.6	0.33645
1527	NW_005081653.1	1240001	1260000	9	82238	0.442626
1528	NW_005081653.1	1220001	1240000	11	74333.6	0.61991
1529	NW_005081653.1	1200001	1220000	9	74042.8	0.62517
1530	NW_005081653.1	1180001	1200000	7	74787.6	0.611144
1531	NW_005081653.1	1160001	1180000	4	73253.3	0.643483
1532	NW_005081653.1	1140001	1160000	8	76836.1	0.560881
1533	NW_005081653.1	1120001	1140000	17	70893.9	0.687902
1534	NW_005081653.1	1100001	1120000	11	67353.6	0.759984
1535	NW_005081653.1	1080001	1100000	9	65853.3	0.787843
1536	NW_005081653.1	1060001	1080000	12	61955.2	0.851354
1537	NW_005081653.1	1040001	1060000	12	69547.4	0.717319
1538	NW_005081653.1	1020001	1040000	9	72720.5	0.654588
1539	NW_005081653.1	1000001	1020000	11	78767.9	0.519384
1540	NW_005081653.1	980001	1000000	7	86397.2	0.36392
1541	NW_005081653.1	960001	980000	10	86171.9	0.367816
1542	NW_005081653.1	940001	960000	6	92353.1	0.268654
1543	NW_005081653.1	920001	940000	10	101557	0.162673
1544	NW_005081653.1	900001	920000	6	96526	0.215858
1545	NW_005081653.1	880001	900000	6	95741.4	0.22482
1546	NW_005081653.1	860001	880000	7	100169	0.177089
1547	NW_005081653.1	840001	860000	10	112659	0.0872784
1548	NW_005081653.1	820001	840000	6	108326	0.110851
1549	NW_005081653.1	800001	820000	11	116103	0.0753945
1550	NW_005081653.1	780001	800000	7	121339	0.0564972
1551	NW_005081653.1	760001	780000	7	116174	0.0748101
1552	NW_005081653.1	740001	760000	6	115321	0.0777323
1553	NW_005081653.1	720001	740000	9	116092	0.0755893
1554	NW_005081653.1	700001	720000	6	110121	0.100721
1555	NW_005081653.1	680001	700000	4	107993	0.113384
1556	NW_005081653.1	660001	680000	16	102776	0.153906
1557	NW_005081653.1	640001	660000	11	106349	0.124683
1558	NW_005081653.1	620001	640000	7	97572.5	0.201831
1559	NW_005081653.1	600001	620000	4	100536	0.173583
1560	NW_005081653.1	580001	600000	8	105720	0.128385
1561	NW_005081653.1	560001	580000	15	92778.5	0.263589
1562	NW_005081653.1	540001	560000	13	90496.8	0.294954
1563	NW_005081653.1	520001	540000	2	89539.3	0.31054
1564	NW_005081653.1	500001	520000	10	94959.6	0.236119
1565	NW_005081653.1	480001	500000	6	105494	0.129944
1566	NW_005081653.1	460001	480000	9	100373	0.175726
1567	NW_005081653.1	440001	460000	4	97122	0.207871
1568	NW_005081653.1	420001	440000	7	94490.5	0.241769
1569	NW_005081653.1	400001	420000	9	69473	0.718878
1570	NW_005081653.1	380001	400000	9	77264.3	0.550945
1571	NW_005081653.1	360001	380000	8	65558.7	0.791935
1572	NW_005081653.1	340001	360000	13	64169.5	0.816482
1573	NW_005081653.1	320001	340000	8	66431.2	0.77557
1574	NW_005081653.1	300001	320000	12	64802.5	0.806156
1575	NW_005081653.1	280001	300000	9	55901.9	0.915059
1576	NW_005081653.1	260001	280000	13	65999.5	0.784337
1577	NW_005081653.1	240001	260000	12	76449.2	0.568868
1578	NW_005081653.1	220001	240000	12	78350.9	0.529125
1579	NW_005081653.1	200001	220000	11	97679.6	0.201247
1580	NW_005081653.1	180001	200000	9	99779.6	0.179427
1581	NW_005081653.1	160001	180000	7	99300.1	0.183908
1582	NW_005081653.1	140001	160000	4	103824	0.143386
1583	NW_005081653.1	120001	140000	4	105917	0.126729
1584	NW_005081653.1	100001	120000	7	105294	0.132671
1585	NW_005081653.1	80001	100000	4	94722.3	0.238262
1586	NW_005081653.1	60001	80000	8	97552.2	0.202611
1587	NW_005081653.1	40001	60000	9	90988.4	0.287941
1588	NW_005081653.1	20001	40000	6	88143.2	0.333918
1589	NW_005081653.1	1	20000	4	76214.4	0.573739
1590	NW_005081589.1	4440001	4460000	3	35651.5	0.993571
1591	NW_005081589.1	4420001	4440000	6	49881.9	0.95714
1592	NW_005081589.1	4400001	4420000	5	53307.9	0.934541
1593	NW_005081589.1	4380001	4400000	10	57618.2	0.899279
1594	NW_005081589.1	4360001	4380000	10	54916.7	0.923242
1595	NW_005081589.1	4340001	4360000	15	64366.5	0.814339
1596	NW_005081589.1	4320001	4340000	12	73638.7	0.634911
1597	NW_005081589.1	4300001	4320000	5	74540.1	0.615819
1598	NW_005081589.1	4280001	4300000	11	96715.8	0.214105
1599	NW_005081589.1	4260001	4280000	10	99387.6	0.183324
1600	NW_005081589.1	4240001	4260000	3	99507.8	0.182155
1601	NW_005081589.1	4220001	4240000	5	106798	0.121177
1602	NW_005081589.1	4200001	4220000	11	112243	0.0888369
1603	NW_005081589.1	4180001	4200000	7	100542	0.173388
1604	NW_005081589.1	4160001	4180000	7	88455.7	0.327099
1605	NW_005081589.1	4140001	4160000	8	90563	0.29437
1606	NW_005081589.1	4120001	4140000	9	79717.2	0.493474
1607	NW_005081589.1	4100001	4120000	4	81439.8	0.456653
1608	NW_005081589.1	4080001	4100000	10	76917.4	0.557958
1609	NW_005081589.1	4060001	4080000	17	74005.2	0.626145
1610	NW_005081589.1	4040001	4060000	10	72248	0.665108
1611	NW_005081589.1	4020001	4040000	9	76375.4	0.570621
1612	NW_005081589.1	4000001	4020000	10	76334.6	0.57179
1613	NW_005081589.1	3980001	4000000	10	74489.6	0.617767
1614	NW_005081589.1	3960001	3980000	3	76488.6	0.567504
1615	NW_005081589.1	3940001	3960000	9	85860.3	0.373271
1616	NW_005081589.1	3920001	3940000	5	75023	0.604715
1617	NW_005081589.1	3900001	3920000	8	84702	0.396065
1618	NW_005081589.1	3880001	3900000	7	88515.3	0.325443
1619	NW_005081589.1	3860001	3880000	7	93635.2	0.25151
1620	NW_005081589.1	3840001	3860000	11	88749	0.322424
1621	NW_005081589.1	3820001	3840000	8	82161.4	0.444574
1622	NW_005081589.1	3800001	3820000	6	76213.3	0.573933
1623	NW_005081589.1	3780001	3800000	11	66938.6	0.766219
1624	NW_005081589.1	3760001	3780000	11	61166	0.86051
1625	NW_005081589.1	3740001	3760000	6	62218.2	0.847847
1626	NW_005081589.1	3720001	3740000	8	81418	0.457627
1627	NW_005081589.1	3700001	3720000	9	73311.5	0.642899
1628	NW_005081589.1	3680001	3700000	6	75891.1	0.581531
1629	NW_005081589.1	3660001	3680000	8	84408.6	0.401909
1630	NW_005081589.1	3640001	3660000	8	82728.3	0.434054
1631	NW_005081589.1	3620001	3640000	13	86758.7	0.355737
1632	NW_005081589.1	3600001	3620000	5	90989.9	0.287746
1633	NW_005081589.1	3580001	3600000	10	85478.5	0.3797
1634	NW_005081589.1	3560001	3580000	11	77576.6	0.543347
1635	NW_005081589.1	3540001	3560000	6	72791.8	0.653419
1636	NW_005081589.1	3520001	3540000	6	79841.2	0.491136
1637	NW_005081589.1	3500001	3520000	10	70089.7	0.703098
1638	NW_005081589.1	3480001	3500000	9	73736.8	0.632184
1639	NW_005081589.1	3460001	3480000	10	74094	0.624196
1640	NW_005081589.1	3440001	3460000	9	77209.4	0.551724
1641	NW_005081589.1	3420001	3440000	3	80037	0.485291
1642	NW_005081589.1	3400001	3420000	13	88461.7	0.326904
1643	NW_005081589.1	3380001	3400000	8	87033	0.349503
1644	NW_005081589.1	3360001	3380000	10	86438.1	0.362946
1645	NW_005081589.1	3340001	3360000	7	88175.5	0.332944
1646	NW_005081589.1	3320001	3340000	7	80723.1	0.471654
1647	NW_005081589.1	3300001	3320000	7	82274.4	0.442237
1648	NW_005081589.1	3280001	3300000	6	83121	0.426456
1649	NW_005081589.1	3260001	3280000	13	79379.6	0.503409
1650	NW_005081589.1	3240001	3260000	19	65641.8	0.790571
1651	NW_005081589.1	3220001	3240000	10	65911.2	0.786285
1652	NW_005081589.1	3200001	3220000	6	63224.7	0.833041
1653	NW_005081589.1	3180001	3200000	9	68505.1	0.73797
1654	NW_005081589.1	3160001	3180000	10	83937.8	0.41165
1655	NW_005081589.1	3140001	3160000	4	92718	0.264952
1656	NW_005081589.1	3120001	3140000	7	92142	0.272161
1657	NW_005081589.1	3100001	3120000	5	98107.3	0.197545
1658	NW_005081589.1	3080001	3100000	9	103264	0.14923
1659	NW_005081589.1	3060001	3080000	9	103706	0.145919
1660	NW_005081589.1	3040001	3060000	6	107478	0.116306
1661	NW_005081589.1	3020001	3040000	9	109713	0.102864
1662	NW_005081589.1	3000001	3020000	6	126965	0.0430547
1663	NW_005081589.1	2980001	3000000	4	130832	0.0354568
1664	NW_005081589.1	2960001	2980000	5	138574	0.0222092
1665	NW_005081589.1	2940001	2960000	4	115062	0.078122
1666	NW_005081589.1	2920001	2940000	10	109691	0.103253
1667	NW_005081589.1	2900001	2920000	8	105723	0.12819
1668	NW_005081589.1	2880001	2900000	9	110368	0.0989675
1669	NW_005081589.1	2860001	2880000	2	117134	0.0720826
1670	NW_005081589.1	2840001	2860000	4	118929	0.0662381
1671	NW_005081589.1	2820001	2840000	4	105512	0.129554
1672	NW_005081589.1	2800001	2820000	9	105210	0.133061
1673	NW_005081589.1	2780001	2800000	7	99181.7	0.185661
1674	NW_005081589.1	2760001	2780000	6	92892.5	0.262225
1675	NW_005081589.1	2740001	2760000	8	93978.5	0.248782
1676	NW_005081589.1	2720001	2740000	15	92328.8	0.269043
1677	NW_005081589.1	2700001	2720000	6	89062.5	0.318332
1678	NW_005081589.1	2680001	2700000	10	90255.3	0.298461
1679	NW_005081589.1	2660001	2680000	11	86495.8	0.362264
1680	NW_005081589.1	2640001	2660000	8	79544.7	0.497954
1681	NW_005081589.1	2620001	2640000	9	81473.1	0.456263
1682	NW_005081589.1	2600001	2620000	1	82140.2	0.445159
1683	NW_005081589.1	2580001	2600000	8	97413.4	0.204559
1684	NW_005081589.1	2560001	2580000	8	84727.2	0.395091
1685	NW_005081589.1	2540001	2560000	8	84282.9	0.404052
1686	NW_005081589.1	2520001	2540000	7	83384.1	0.420222
1687	NW_005081589.1	2500001	2520000	8	84379.6	0.402494
1688	NW_005081589.1	2480001	2500000	14	91195.5	0.285408
1689	NW_005081589.1	2460001	2480000	10	89234.9	0.315995
1690	NW_005081589.1	2440001	2460000	12	85757.1	0.375024
1691	NW_005081589.1	2420001	2440000	7	87340.9	0.345022
1692	NW_005081589.1	2400001	2420000	10	89617.8	0.309566
1693	NW_005081589.1	2380001	2400000	4	87978.4	0.335671
1694	NW_005081589.1	2360001	2380000	9	90847.9	0.289694
1695	NW_005081589.1	2340001	2360000	10	78262.3	0.530684
1696	NW_005081589.1	2320001	2340000	4	87510.5	0.341711
1697	NW_005081589.1	2300001	2320000	11	88417.1	0.329047
1698	NW_005081589.1	2280001	2300000	10	85576.1	0.377167
1699	NW_005081589.1	2260001	2280000	3	85489.7	0.37931
1700	NW_005081589.1	2240001	2260000	10	89535.2	0.310929
1701	NW_005081589.1	2220001	2240000	7	82617.2	0.436197
1702	NW_005081589.1	2200001	2220000	11	79903.8	0.489188
1703	NW_005081589.1	2180001	2200000	9	74819.3	0.609975
1704	NW_005081589.1	2160001	2180000	11	77189.2	0.552114
1705	NW_005081589.1	2140001	2160000	6	81313.7	0.459965
1706	NW_005081589.1	2120001	2140000	8	85213	0.38496
1707	NW_005081589.1	2100001	2120000	13	84995.6	0.389636
1708	NW_005081589.1	2080001	2100000	6	78618.4	0.522696
1709	NW_005081589.1	2060001	2080000	11	84749.3	0.394701
1710	NW_005081589.1	2040001	2060000	9	79238.9	0.506526
1711	NW_005081589.1	2020001	2040000	4	78807.2	0.51841
1712	NW_005081589.1	2000001	2020000	13	79605.1	0.496591
1713	NW_005081589.1	1980001	2000000	9	84554.6	0.398792
1714	NW_005081589.1	1960001	1980000	15	75382.1	0.594
1715	NW_005081589.1	1940001	1960000	8	89937.8	0.303137
1716	NW_005081589.1	1920001	1940000	9	100530	0.173778
1717	NW_005081589.1	1900001	1920000	8	103777	0.144165
1718	NW_005081589.1	1880001	1900000	8	110793	0.0966297
1719	NW_005081589.1	1860001	1880000	6	120626	0.0590298
1720	NW_005081589.1	1840001	1860000	5	117104	0.0724722
1721	NW_005081589.1	1820001	1840000	9	113139	0.0851354
1722	NW_005081589.1	1800001	1820000	7	110701	0.0972141
1723	NW_005081589.1	1780001	1800000	8	106629	0.122638
1724	NW_005081589.1	1760001	1780000	5	109728	0.102669
1725	NW_005081589.1	1740001	1760000	3	111662	0.0915644
1726	NW_005081589.1	1720001	1740000	12	112333	0.0882525
1727	NW_005081589.1	1700001	1720000	3	104968	0.134814
1728	NW_005081589.1	1680001	1700000	5	100458	0.174946
1729	NW_005081589.1	1660001	1680000	12	96552.9	0.215469
1730	NW_005081589.1	1640001	1660000	14	77769.2	0.53984
1731	NW_005081589.1	1620001	1640000	7	73285.9	0.643094
1732	NW_005081589.1	1600001	1620000	11	70994.7	0.686538
1733	NW_005081589.1	1580001	1600000	11	82757	0.433859
1734	NW_005081589.1	1560001	1580000	8	87081.4	0.348529
1735	NW_005081589.1	1540001	1560000	6	86336.3	0.365673
1736	NW_005081589.1	1520001	1540000	6	84465.5	0.400351
1737	NW_005081589.1	1500001	1520000	10	81899.7	0.448665
1738	NW_005081589.1	1480001	1500000	13	73192.3	0.644068
1739	NW_005081589.1	1460001	1480000	10	74123.9	0.623222
1740	NW_005081589.1	1440001	1460000	11	80428.8	0.478083
1741	NW_005081589.1	1420001	1440000	12	81082.5	0.464251
1742	NW_005081589.1	1400001	1420000	5	87570.1	0.341126
1743	NW_005081589.1	1380001	1400000	9	87839.6	0.338399
1744	NW_005081589.1	1360001	1380000	11	93485.7	0.253848
1745	NW_005081589.1	1340001	1360000	5	100273	0.176895
1746	NW_005081589.1	1320001	1340000	14	102011	0.159556
1747	NW_005081589.1	1300001	1320000	5	114392	0.0800701
1748	NW_005081589.1	1280001	1300000	9	113329	0.0841613
1749	NW_005081589.1	1260001	1280000	5	105623	0.129164
1750	NW_005081589.1	1240001	1260000	5	101218	0.166764
1751	NW_005081589.1	1220001	1240000	10	96401.3	0.218975
1752	NW_005081589.1	1200001	1220000	11	99995.7	0.178453
1753	NW_005081589.1	1180001	1200000	5	100496	0.174752
1754	NW_005081589.1	1160001	1180000	4	95694.3	0.225794
1755	NW_005081589.1	1140001	1160000	12	94515.7	0.241574
1756	NW_005081589.1	1120001	1140000	9	87922.1	0.33723
1757	NW_005081589.1	1100001	1120000	4	80726.4	0.471264
1758	NW_005081589.1	1080001	1100000	16	72181.6	0.666082
1759	NW_005081589.1	1060001	1080000	8	66648.6	0.771089
1760	NW_005081589.1	1040001	1060000	7	70970.9	0.687123
1761	NW_005081589.1	1020001	1040000	10	68288.4	0.744399
1762	NW_005081589.1	1000001	1020000	17	59992.7	0.873563
1763	NW_005081589.1	980001	1000000	8	62433.7	0.845704
1764	NW_005081589.1	960001	980000	12	62611.6	0.842587
1765	NW_005081589.1	940001	960000	21	66219.3	0.778882
1766	NW_005081589.1	920001	940000	11	84645.6	0.397039
1767	NW_005081589.1	900001	920000	11	89797.7	0.30528
1768	NW_005081589.1	880001	900000	8	94617.4	0.239821
1769	NW_005081589.1	860001	880000	8	96512.4	0.216248
1770	NW_005081589.1	840001	860000	10	97236.7	0.205728
1771	NW_005081589.1	820001	840000	7	100156	0.177284
1772	NW_005081589.1	800001	820000	10	103552	0.146698
1773	NW_005081589.1	780001	800000	7	101651	0.161504
1774	NW_005081589.1	760001	780000	7	102747	0.154491
1775	NW_005081589.1	740001	760000	12	87655.8	0.339957
1776	NW_005081589.1	720001	740000	10	79481.1	0.500877
1777	NW_005081589.1	700001	720000	10	77142	0.553088
1778	NW_005081589.1	680001	700000	16	72130.9	0.667056
1779	NW_005081589.1	660001	680000	13	71155.1	0.683616
1780	NW_005081589.1	640001	660000	6	80343.4	0.480031
1781	NW_005081589.1	620001	640000	12	89375.1	0.313657
1782	NW_005081589.1	600001	620000	3	89291.6	0.314631
1783	NW_005081589.1	580001	600000	12	115402	0.0773427
1784	NW_005081589.1	560001	580000	3	122707	0.0518215
1785	NW_005081589.1	520001	540000	2	123809	0.0498734
1786	NW_005081589.1	500001	520000	11	114326	0.0804598
1787	NW_005081589.1	480001	500000	9	97684.4	0.201052
1788	NW_005081589.1	460001	480000	8	105628	0.128969
1789	NW_005081589.1	440001	460000	8	103785	0.14397
1790	NW_005081589.1	420001	440000	10	89304.6	0.314241
1791	NW_005081589.1	400001	420000	9	81904.9	0.448471
1792	NW_005081589.1	380001	400000	15	75122.7	0.601598
1793	NW_005081589.1	360001	380000	9	63620.4	0.825248
1794	NW_005081589.1	340001	360000	9	67067.4	0.763491
1795	NW_005081589.1	320001	340000	7	75260.6	0.597117
1796	NW_005081589.1	300001	320000	6	76856.4	0.559906
1797	NW_005081589.1	280001	300000	7	84850.9	0.392558
1798	NW_005081589.1	260001	280000	6	86260.4	0.366842
1799	NW_005081589.1	240001	260000	8	87643.1	0.340347
1800	NW_005081589.1	220001	240000	4	86527	0.360803
1801	NW_005081589.1	200001	220000	9	90322.3	0.297097
1802	NW_005081589.1	180001	200000	11	81758.2	0.450224
1803	NW_005081589.1	160001	180000	10	54285	0.929281
1804	NW_005081589.1	140001	160000	9	62845.6	0.837717
1805	NW_005081589.1	120001	140000	8	62166.2	0.849016
1806	NW_005081589.1	100001	120000	11	60670.9	0.86616
1807	NW_005081589.1	80001	100000	13	52886.8	0.938243
1808	NW_005081589.1	60001	80000	9	55507.4	0.917982
1809	NW_005081589.1	40001	60000	14	57673.3	0.8985
1810	NW_005081589.1	20001	40000	6	58810.4	0.885447
1811	NW_005081589.1	1	20000	12	55194.5	0.920514
1812	NW_005081611.1	1	20000	11	58221.1	0.891876
1813	NW_005081611.1	20001	40000	5	62464.4	0.845315
1814	NW_005081611.1	40001	60000	16	72999.7	0.648354
1815	NW_005081611.1	60001	80000	4	75950.9	0.580557
1816	NW_005081611.1	80001	100000	7	78826.6	0.518021
1817	NW_005081611.1	100001	120000	8	72075.2	0.66803
1818	NW_005081611.1	120001	140000	8	77736.9	0.541009
1819	NW_005081611.1	140001	160000	8	73971.8	0.626534
1820	NW_005081611.1	160001	180000	8	58913.2	0.884863
1821	NW_005081611.1	180001	200000	4	73401.8	0.640951
1822	NW_005081611.1	200001	220000	6	79951.5	0.487824
1823	NW_005081611.1	220001	240000	7	72823.4	0.65225
1824	NW_005081611.1	240001	260000	14	65975.4	0.785311
1825	NW_005081611.1	260001	280000	15	64830.7	0.805377
1826	NW_005081611.1	280001	300000	7	61092.8	0.861095
1827	NW_005081611.1	300001	320000	7	59883.2	0.875122
1828	NW_005081611.1	320001	340000	13	60481.9	0.867134
1829	NW_005081611.1	340001	360000	14	69780.5	0.71089
1830	NW_005081611.1	360001	380000	7	69931.5	0.706994
1831	NW_005081611.1	380001	400000	12	66539.3	0.773816
1832	NW_005081611.1	400001	420000	10	71130.5	0.6842
1833	NW_005081611.1	420001	440000	9	71374.9	0.680304
1834	NW_005081611.1	440001	460000	8	74112	0.623807
1835	NW_005081611.1	460001	480000	14	68369.3	0.741866
1836	NW_005081611.1	480001	500000	10	62699.2	0.840639
1837	NW_005081611.1	500001	520000	12	65300.2	0.79661
1838	NW_005081611.1	520001	540000	17	56291.1	0.911358
1839	NW_005081611.1	540001	560000	10	58887.3	0.885057
1840	NW_005081611.1	560001	580000	7	62668.4	0.841418
1841	NW_005081611.1	580001	600000	13	65590.1	0.79135
1842	NW_005081611.1	600001	620000	10	72342.8	0.662575
1843	NW_005081611.1	620001	640000	10	76859.4	0.559322
1844	NW_005081611.1	640001	660000	11	76821.6	0.56127
1845	NW_005081611.1	660001	680000	7	83124.7	0.426261
1846	NW_005081611.1	680001	700000	13	79250.2	0.506137
1847	NW_005081611.1	700001	720000	9	79884.5	0.489577
1848	NW_005081611.1	720001	740000	9	88873	0.320865
1849	NW_005081611.1	740001	760000	8	93169.5	0.258328
1850	NW_005081611.1	760001	780000	6	93206.6	0.257939
1851	NW_005081611.1	780001	800000	9	74864.5	0.609195
1852	NW_005081611.1	800001	820000	11	73668.5	0.633742
1853	NW_005081611.1	820001	840000	10	79755.5	0.493084
1854	NW_005081611.1	840001	860000	8	77783.4	0.539451
1855	NW_005081611.1	860001	880000	6	76509.4	0.56731
1856	NW_005081611.1	880001	900000	12	74161	0.622638
1857	NW_005081611.1	900001	920000	16	70165.9	0.701929
1858	NW_005081611.1	920001	940000	12	67180.9	0.761543
1859	NW_005081611.1	940001	960000	12	75980.7	0.579388
1860	NW_005081611.1	960001	980000	7	73621.8	0.635301
1861	NW_005081611.1	980001	1000000	5	73952.3	0.628288
1862	NW_005081611.1	1000001	1020000	14	74388.9	0.619034
1863	NW_005081611.1	1020001	1040000	9	72861.1	0.651471
1864	NW_005081611.1	1040001	1060000	6	70485.2	0.6955
1865	NW_005081611.1	1060001	1080000	9	77960.7	0.535944
1866	NW_005081611.1	1080001	1100000	9	79213.5	0.507111
1867	NW_005081611.1	1100001	1120000	11	70705.8	0.692188
1868	NW_005081611.1	1120001	1140000	12	84653.6	0.396844
1869	NW_005081611.1	1140001	1160000	6	86801.4	0.354568
1870	NW_005081611.1	1160001	1180000	10	93993.5	0.248588
1871	NW_005081611.1	1180001	1200000	6	89420	0.312877
1872	NW_005081611.1	1200001	1220000	13	89238.8	0.315605
1873	NW_005081611.1	1220001	1240000	10	80940.3	0.466394
1874	NW_005081611.1	1240001	1260000	5	82301.4	0.441457
1875	NW_005081611.1	1260001	1280000	7	83623.5	0.416715
1876	NW_005081611.1	1280001	1300000	7	86727.8	0.357296
1877	NW_005081611.1	1300001	1320000	8	84089	0.408533
1878	NW_005081611.1	1320001	1340000	10	70069	0.703487
1879	NW_005081611.1	1340001	1360000	6	72573.9	0.658095
1880	NW_005081611.1	1360001	1380000	7	68427.6	0.739918
1881	NW_005081611.1	1380001	1400000	11	82628.3	0.435808
1882	NW_005081611.1	1400001	1420000	8	71492.6	0.678356
1883	NW_005081611.1	1420001	1440000	12	73163.8	0.645042
1884	NW_005081611.1	1440001	1460000	9	90793.2	0.290279
1885	NW_005081611.1	1460001	1480000	4	81360.9	0.458796
1886	NW_005081611.1	1480001	1500000	7	82234.8	0.442821
1887	NW_005081611.1	1500001	1520000	6	79508.9	0.498539
1888	NW_005081611.1	1520001	1540000	5	82051.2	0.446133
1889	NW_005081611.1	1540001	1560000	14	75772.4	0.585038
1890	NW_005081611.1	1560001	1580000	13	66756.6	0.769141
1891	NW_005081611.1	1580001	1600000	6	69218.6	0.723164
1892	NW_005081611.1	1600001	1620000	11	69800.3	0.709721
1893	NW_005081611.1	1620001	1640000	10	62183	0.848627
1894	NW_005081611.1	1640001	1660000	17	54758.4	0.924995
1895	NW_005081611.1	1660001	1680000	9	59084.8	0.883109
1896	NW_005081611.1	1680001	1700000	13	54296.9	0.929086
1897	NW_005081611.1	1700001	1720000	11	55408	0.918956
1898	NW_005081611.1	1720001	1740000	11	63247.3	0.832457
1899	NW_005081611.1	1740001	1760000	12	67146.4	0.762322
1900	NW_005081611.1	1760001	1780000	15	63039.9	0.834989
1901	NW_005081611.1	1780001	1800000	8	68027.2	0.749269
1902	NW_005081611.1	1800001	1820000	11	67665.9	0.755114
1903	NW_005081611.1	1820001	1840000	12	61872.4	0.851938
1904	NW_005081611.1	1840001	1860000	13	61933	0.851549
1905	NW_005081611.1	1860001	1880000	10	58037.7	0.893629
1906	NW_005081611.1	1880001	1900000	3	61046.1	0.862069
1907	NW_005081611.1	1900001	1920000	13	55835.3	0.916228
1908	NW_005081611.1	1920001	1940000	7	71172.4	0.683421
1909	NW_005081611.1	1940001	1960000	8	72893.4	0.650692
1910	NW_005081611.1	1960001	1980000	11	73579.1	0.635885
1911	NW_005081611.1	1980001	2000000	9	67361.8	0.75979
1912	NW_005081611.1	2000001	2020000	12	68093.8	0.747906
1913	NW_005081611.1	2020001	2040000	15	45528.7	0.970583
1914	NW_005081611.1	2040001	2060000	9	54847.5	0.924021
1915	NW_005081611.1	2060001	2080000	9	69033.5	0.728814
1916	NW_005081611.1	2080001	2100000	13	75265.2	0.596532
1917	NW_005081611.1	2100001	2120000	9	77040.9	0.55562
1918	NW_005081611.1	2120001	2140000	12	84240.1	0.404637
1919	NW_005081611.1	2140001	2160000	8	89777	0.306059
1920	NW_005081611.1	2160001	2180000	7	88484.4	0.326125
1921	NW_005081611.1	2180001	2200000	14	88790.9	0.322229
1922	NW_005081611.1	2200001	2220000	7	68416.1	0.740503
1923	NW_005081611.1	2220001	2240000	14	66336.5	0.777323
1924	NW_005081611.1	2240001	2260000	11	78242.5	0.531463
1925	NW_005081611.1	2260001	2280000	12	81383.2	0.458406
1926	NW_005081611.1	2280001	2300000	10	91469.7	0.281122
1927	NW_005081611.1	2300001	2320000	7	94047.1	0.248003
1928	NW_005081611.1	2320001	2340000	12	95269.3	0.231833
1929	NW_005081611.1	2340001	2360000	6	94621.8	0.239626
1930	NW_005081611.1	2360001	2380000	10	91671.7	0.278395
1931	NW_005081611.1	2380001	2400000	7	91301.8	0.28385
1932	NW_005081611.1	2400001	2420000	7	87750.4	0.339568
1933	NW_005081611.1	2420001	2440000	12	79891.9	0.489382
1934	NW_005081611.1	2440001	2460000	9	66990.3	0.765244
1935	NW_005081611.1	2460001	2480000	14	66110.4	0.781609
1936	NW_005081611.1	2480001	2500000	17	53208.7	0.93571
1937	NW_005081611.1	2500001	2520000	12	62763.7	0.839275
1938	NW_005081611.1	2520001	2540000	18	76928.1	0.557374
1939	NW_005081611.1	2540001	2560000	8	82519.6	0.43834
1940	NW_005081611.1	2560001	2580000	10	85510.5	0.378336
1941	NW_005081611.1	2580001	2600000	7	90725.7	0.291253
1942	NW_005081611.1	2600001	2620000	5	92764.8	0.263978
1943	NW_005081611.1	2620001	2640000	14	103926	0.142412
1944	NW_005081611.1	2640001	2660000	11	111491	0.0926359
1945	NW_005081611.1	2660001	2680000	4	118387	0.0681862
1946	NW_005081611.1	2680001	2700000	8	116782	0.0734463
1947	NW_005081611.1	2700001	2720000	4	116422	0.0742256
1948	NW_005081611.1	2720001	2740000	6	117129	0.0722774
1949	NW_005081611.1	2740001	2760000	6	118542	0.0676018
1950	NW_005081611.1	2760001	2780000	4	122559	0.052406
1951	NW_005081611.1	2780001	2800000	8	123027	0.0512371
1952	NW_005081611.1	2800001	2820000	5	133581	0.0296123
1953	NW_005081611.1	2820001	2840000	5	111846	0.0903955
1954	NW_005081611.1	2840001	2860000	5	116106	0.0751997
1955	NW_005081611.1	2860001	2880000	8	110258	0.0997467
1956	NW_005081611.1	2880001	2900000	6	101145	0.16803
1957	NW_005081611.1	2900001	2920000	6	99467.9	0.182544
1958	NW_005081611.1	2920001	2940000	10	100056	0.178258
1959	NW_005081611.1	2940001	2960000	9	92998.6	0.260471
1960	NW_005081611.1	2960001	2980000	10	91468.8	0.281317
1961	NW_005081611.1	2980001	3000000	6	91901.1	0.275278
1962	NW_005081611.1	3000001	3020000	5	87121.5	0.347945
1963	NW_005081611.1	3020001	3040000	7	87248.5	0.346581
1964	NW_005081611.1	3040001	3060000	6	76716.3	0.563413
1965	NW_005081611.1	3060001	3080000	13	70318.9	0.698227
1966	NW_005081611.1	3080001	3100000	8	66038.9	0.783363
1967	NW_005081611.1	3100001	3120000	12	65962.7	0.7857
1968	NW_005081611.1	3120001	3140000	9	67500.7	0.758036
1969	NW_005081611.1	3140001	3160000	13	69767.5	0.71167
1970	NW_005081611.1	3160001	3180000	6	70317.1	0.698812
1971	NW_005081611.1	3180001	3200000	13	71340.5	0.681083
1972	NW_005081611.1	3200001	3220000	8	68027	0.749464
1973	NW_005081611.1	3220001	3240000	13	59847.2	0.875317
1974	NW_005081611.1	3240001	3260000	16	74597.4	0.614261
1975	NW_005081611.1	3260001	3280000	7	79635.2	0.495227
1976	NW_005081611.1	3280001	3300000	10	76277.3	0.57257
1977	NW_005081611.1	3300001	3320000	7	73872	0.630625
1978	NW_005081611.1	3320001	3340000	14	89633.5	0.308981
1979	NW_005081611.1	3340001	3360000	11	92261.3	0.270797
1980	NW_005081611.1	3360001	3380000	6	97036.4	0.209234
1981	NW_005081611.1	3380001	3400000	9	93912.2	0.249367
1982	NW_005081611.1	3400001	3420000	9	91376	0.28307
1983	NW_005081611.1	3420001	3440000	7	92907.9	0.261446
1984	NW_005081611.1	3440001	3460000	7	91111.6	0.286187
1985	NW_005081611.1	3460001	3480000	10	84148.7	0.40678
1986	NW_005081611.1	3480001	3500000	8	77601.9	0.542373
1987	NW_005081611.1	3500001	3520000	8	80356.3	0.479642
1988	NW_005081611.1	3520001	3540000	7	69077.8	0.727645
1989	NW_005081611.1	3540001	3560000	9	61322	0.859342
1990	NW_005081611.1	3560001	3580000	10	43686.3	0.977206
1991	NW_005081632.1	2500001	2520000	10	42076.4	0.981297
1992	NW_005081632.1	2480001	2500000	6	53413.7	0.933957
1993	NW_005081632.1	2460001	2480000	8	53347.8	0.934346
1994	NW_005081632.1	2440001	2460000	10	62322.7	0.846873
1995	NW_005081632.1	2420001	2440000	8	70873.9	0.688291
1996	NW_005081632.1	2400001	2420000	5	61419.2	0.857978
1997	NW_005081632.1	2380001	2400000	5	82470.6	0.438925
1998	NW_005081632.1	2360001	2380000	5	90257.4	0.298071
1999	NW_005081632.1	2340001	2360000	10	90461	0.295539
[truncated: 2,536 more rows]

## Sheet: Hscan_Z2_genes
chrom	chromStart	chromEnd	gene_name
NW_005081548.1	425730	461726	RAB3GAP2
NW_005081548.1	1709670	2071828	ESRRG
NW_005081548.1	2099514	2476250	USH2A
NW_005081548.1	2814604	2921569	PTPN14
NW_005081548.1	3501733	3517130	ANGEL2
NW_005081548.1	3734601	3753669	TMEM206
NW_005081548.1	4197878	4370446	KCNH1
NW_005081548.1	4948887	4994562	BICRAL
NW_005081548.1	5232465	5253582	PKDCC
NW_005081548.1	5495348	5642673	EML4
NW_005081548.1	8618158	8658591	EPAS1
NW_005081553.1	2394077	3190387	EYS
NW_005081553.1	8749385	8757334	PRDM13
NW_005081561.1	1585705	1665010	SESN1
NW_005081561.1	2117938	2172897	SEC63
NW_005081561.1	2186661	2251665	SCML4
NW_005081561.1	2400430	2528889	PDSS2
NW_005081561.1	2539655	2559822	BEND3
NW_005081561.1	2753670	2831484	CD2AP
NW_005081561.1	5998780	6055615	HS1BP3
NW_005081569.1	399250	532800	MEI4
NW_005081569.1	1078798	1082207	LOC102067599
NW_005081569.1	2489006	2549973	DOP1A
NW_005081569.1	2558387	2564308	RWDD2A
NW_005081569.1	2754317	2764045	PRSS35
NW_005081569.1	5334882	5392245	BMP5
NW_005081569.1	5472658	5524810	HMGCLL1
NW_005081569.1	6351238	6380804	ICK
NW_005081574.1	2831942	3509692	PRKN
NW_005081577.1	98242	99572	MEA1
NW_005081577.1	1058003	1060837	PAX1
NW_005081577.1	5116242	5211246	PLCB4
NW_005081577.1	5214972	5224730	LAMP5
NW_005081577.1	5383177	5398731	ANKEF1
NW_005081577.1	5398826	5404127	LOC102063416
NW_005081582.1	50993	155170	ROCK2
NW_005081582.1	415853	431919	PDIA6
NW_005081582.1	454964	507658	NOL10
NW_005081582.1	1273902	1282449	ITGB1BP1
NW_005081582.1	1535069	1602871	KIDINS220
NW_005081589.1	503257	519008	OPN3
NW_005081589.1	2627523	2670714	NID1
NW_005081589.1	3702916	3848910	PCNX2
NW_005081620.1	1762446	1868980	SDCCAG8
NW_005081620.1	2400555	2678350	KIF26B
NW_005081620.1	3091761	3144565	CNST
NW_005081621.1	1454601	1615580	NBAS
NW_005081742.1	404906	709885	ALK
NW_005081821.1	31860	108096	SUSD4
NW_005081821.1	147233	155444	TLR5
NW_005081821.1	328044	363487	AIDA
NW_005081548.1	186709	190442	HLX
NW_005081548.1	350550	363894	LOC102071220
NW_005081548.1	375600	379001	LOC102071394
NW_005081548.1	400665	418571	LOC102071579
NW_005081548.1	461922	487724	IARS2
NW_005081548.1	2926772	2956091	SMYD2
NW_005081548.1	3039590	3095451	PROX1
NW_005081548.1	3412800	3497824	RPS6KC1
NW_005081548.1	3518082	3548431	VASH2
NW_005081548.1	3563183	3578397	FLVCR1
NW_005081548.1	3728264	3732969	NENF
NW_005081548.1	4596856	4694279	SYT14
NW_005081548.1	7215489	7292568	LRPPRC
NW_005081553.1	853848	1300183	ADGRB3
NW_005081553.1	8378522	8435086	FBXL4
NW_005081561.1	1660537	1729824	ARMC2
NW_005081561.1	2286782	2400657	SOBP
NW_005081561.1	2589509	2630732	ADGRF5
NW_005081561.1	2663536	2698639	TNFRSF21
NW_005081569.1	377554	381286	HTR1B
NW_005081569.1	1056489	1074118	LCA5
NW_005081569.1	2549964	2558228	PGM3
NW_005081569.1	2564572	2719043	ME1
NW_005081569.1	3215273	3238562	TBX18
NW_005081569.1	5529844	5553595	GFRAL
NW_005081569.1	5560141	5594237	HCRTR2
NW_005081569.1	5665430	5721543	FAM83B
NW_005081569.1	5899699	5994414	MLIP
NW_005081574.1	4283989	4395882	TTC27
NW_005081577.1	77963	98087	KLHDC3
NW_005081577.1	99454	127137	PPP2R5D
NW_005081577.1	1057027	1057825	LOC106629373
NW_005081577.1	5227680	5416404	PAK5
NW_005081582.1	431766	454886	ATP6V1C2
NW_005081582.1	946849	987206	GRHL1
NW_005081582.1	1254877	1273884	CPSF3
NW_005081582.1	1282723	1365917	ASAP2
NW_005081582.1	3716965	3762766	COLEC11
NW_005081589.1	411452	429105	EXO1
NW_005081589.1	435483	503146	WDR64
NW_005081589.1	598078	600448	PIGM
NW_005081589.1	2317995	2369564	MTR
NW_005081611.1	1538908	1884856	UTRN
NW_005081620.1	2690069	3073244	SMYD3
NW_005081620.1	3079631	3088741	TFB2M
NW_005081621.1	160375	160897	MSGN1
NW_005081621.1	175791	198245	GEN1
NW_005081621.1	243807	331990	VSNL1
NW_005081621.1	1432697	1452535	DDX1
NW_005081621.1	3012153	3061203	LPIN1
NW_005081621.1	3100814	3165186	GREB1
NW_005081654.1	1618176	1622034	LOC102068280
NW_005081654.1	1625628	1632656	TMEM30A
NW_005081654.1	1642839	1752136	FILIP1
NW_005081742.1	249846	260753	LBH
NW_005081821.1	204036	298056	DISP1
NW_005081821.1	310511	327948	BROX
NW_005081844.1	93025	231237	SMOC2

## Sheet: Hscan_output_Z2_TSref_win20000
Index	Scaffold	Start	End	Number of Polymorphic sites	ZAL2_H_value	ZAL2_empirical_pvalue
1	NW_005081577.1	5940001	5960000	91	5081.92	0.998958
2	NW_005081577.1	5920001	5940000	166	4549.43	0.418588
3	NW_005081577.1	5900001	5920000	158	4614.42	0.408805
4	NW_005081577.1	5880001	5900000	158	4683.65	0.396226
5	NW_005081577.1	5860001	5880000	148	4921.1	0.365479
6	NW_005081577.1	5840001	5860000	200	3638.77	0.584207
7	NW_005081577.1	5820001	5840000	181	2849.01	0.752621
8	NW_005081577.1	5800001	5820000	177	3341.92	0.651293
9	NW_005081577.1	5780001	5800000	211	2950.8	0.728861
10	NW_005081577.1	5760001	5780000	214	3233.19	0.67086
11	NW_005081577.1	5740001	5760000	171	3916.19	0.538784
12	NW_005081577.1	5720001	5740000	155	4426.71	0.439553
13	NW_005081577.1	5700001	5720000	132	6459.34	0.125087
14	NW_005081577.1	5680001	5700000	131	6414.16	0.128581
15	NW_005081577.1	5660001	5680000	165	5905.3	0.198463
16	NW_005081577.1	5640001	5660000	126	6567.39	0.116702
17	NW_005081577.1	5620001	5640000	136	5531.4	0.247379
18	NW_005081577.1	5600001	5620000	140	5212.73	0.313068
19	NW_005081577.1	5580001	5600000	150	4472.01	0.426974
20	NW_005081577.1	5560001	5580000	198	4261.47	0.470999
21	NW_005081577.1	5540001	5560000	177	4127.2	0.499651
22	NW_005081577.1	5520001	5540000	147	4576.75	0.413697
23	NW_005081577.1	5500001	5520000	126	4670.74	0.398323
24	NW_005081577.1	5480001	5500000	94	5982.33	0.975521
25	NW_005081577.1	5460001	5480000	143	4302.26	0.463312
26	NW_005081577.1	5440001	5460000	94	7071.16	0.901563
27	NW_005081577.1	5420001	5440000	100	5773.77	0.213138
28	NW_005081577.1	5400001	5420000	39	13412.8	0.705821
29	NW_005081577.1	5380001	5400000	108	9959.95	0.0146751
30	NW_005081577.1	5360001	5380000	93	5764.19	0.983854
31	NW_005081577.1	5340001	5360000	82	7147.85	0.891146
32	NW_005081577.1	5320001	5340000	61	7459.64	0.860417
33	NW_005081577.1	5300001	5320000	97	7584.75	0.848958
34	NW_005081577.1	5280001	5300000	115	5065.09	0.336827
35	NW_005081577.1	5260001	5280000	95	7294.73	0.877604
36	NW_005081577.1	5240001	5260000	77	8867.13	0.667708
37	NW_005081577.1	5220001	5240000	46	9080.01	0.984927
38	NW_005081577.1	5200001	5220000	110	8453.51	0.0314465
39	NW_005081577.1	5180001	5200000	138	5434.73	0.269043
40	NW_005081577.1	5160001	5180000	110	8315.84	0.0342418
41	NW_005081577.1	5140001	5160000	82	10079.2	0.477083
42	NW_005081577.1	5120001	5140000	142	5506.75	0.252271
43	NW_005081577.1	5100001	5120000	135	5120.02	0.32914
44	NW_005081577.1	5080001	5100000	110	5359.95	0.283019
45	NW_005081577.1	5060001	5080000	153	4862.86	0.37037
46	NW_005081577.1	5040001	5060000	158	3655.66	0.58211
47	NW_005081577.1	5020001	5040000	94	5547.51	0.990104
48	NW_005081577.1	5000001	5020000	129	4647.88	0.403913
49	NW_005081577.1	4980001	5000000	99	5945.62	0.977604
50	NW_005081577.1	4960001	4980000	72	8185.93	0.774479
51	NW_005081577.1	4940001	4960000	130	5666.68	0.228512
52	NW_005081577.1	4920001	4940000	110	4931.02	0.361985
53	NW_005081577.1	4900001	4920000	107	5151.14	0.322851
54	NW_005081577.1	4880001	4900000	140	5141.5	0.324948
55	NW_005081577.1	4860001	4880000	115	5659.42	0.230608
56	NW_005081577.1	4840001	4860000	128	5344.81	0.290706
57	NW_005081577.1	4820001	4840000	118	4962.77	0.354298
58	NW_005081577.1	4800001	4820000	127	5937.25	0.185185
59	NW_005081577.1	4780001	4800000	129	4944.84	0.356394
60	NW_005081577.1	4760001	4780000	147	4251.19	0.473096
61	NW_005081577.1	4740001	4760000	118	5701.96	0.22362
62	NW_005081577.1	4720001	4740000	83	8947.57	0.659896
63	NW_005081577.1	4700001	4720000	131	6584.37	0.115304
64	NW_005081577.1	4680001	4700000	129	4649.83	0.403215
65	NW_005081577.1	4660001	4680000	179	4001.75	0.524109
66	NW_005081577.1	4640001	4660000	162	5689.87	0.226415
67	NW_005081577.1	4620001	4640000	200	3323.69	0.656883
68	NW_005081577.1	4600001	4620000	173	3746.57	0.56464
69	NW_005081577.1	4580001	4600000	124	4747.7	0.387841
70	NW_005081577.1	4560001	4580000	147	4637.64	0.406709
71	NW_005081577.1	4540001	4560000	163	4688.77	0.39413
72	NW_005081577.1	4520001	4540000	196	4528.17	0.421384
73	NW_005081577.1	4500001	4520000	143	4156.73	0.491265
74	NW_005081577.1	4480001	4500000	174	3392.34	0.635919
75	NW_005081577.1	4460001	4480000	168	4086.56	0.506639
76	NW_005081577.1	4440001	4460000	193	4215.2	0.478686
77	NW_005081577.1	4420001	4440000	158	4984.72	0.352201
78	NW_005081577.1	4400001	4420000	139	5348.95	0.288609
79	NW_005081577.1	4380001	4400000	196	3463.25	0.619147
80	NW_005081577.1	4360001	4380000	168	4063.18	0.51153
81	NW_005081577.1	4340001	4360000	143	4660.85	0.401118
82	NW_005081577.1	4320001	4340000	159	6001.73	0.178197
83	NW_005081577.1	4300001	4320000	129	6455.54	0.125786
84	NW_005081577.1	4280001	4300000	157	3360.34	0.646401
85	NW_005081577.1	4260001	4280000	181	3780.21	0.560447
86	NW_005081577.1	4240001	4260000	125	4537.47	0.419986
87	NW_005081577.1	4220001	4240000	148	4092.07	0.505241
88	NW_005081577.1	4200001	4220000	177	3138.34	0.685535
89	NW_005081577.1	4180001	4200000	191	4200.98	0.48218
90	NW_005081577.1	4160001	4180000	222	3882.47	0.542977
91	NW_005081577.1	4140001	4160000	218	2969.94	0.72327
92	NW_005081577.1	4120001	4140000	201	4125.99	0.500349
93	NW_005081577.1	4100001	4120000	193	3693.76	0.571628
94	NW_005081577.1	4080001	4100000	240	2963.96	0.723969
95	NW_005081577.1	4060001	4080000	230	3206.79	0.673655
96	NW_005081577.1	4040001	4060000	144	4414.92	0.442348
97	NW_005081577.1	4020001	4040000	233	3523.27	0.610063
98	NW_005081577.1	4000001	4020000	355	2051.96	0.91754
99	NW_005081577.1	3980001	4000000	334	1762.07	0.969951
100	NW_005081577.1	3960001	3980000	205	4589.03	0.4116
101	NW_005081577.1	3940001	3960000	288	3398.97	0.63522
102	NW_005081577.1	3920001	3940000	179	4537.18	0.420685
103	NW_005081577.1	3900001	3920000	203	2877.21	0.744934
104	NW_005081577.1	3880001	3900000	180	2888.88	0.74144
105	NW_005081577.1	3860001	3880000	214	2860.16	0.748428
106	NW_005081577.1	3840001	3860000	165	5472.33	0.261356
107	NW_005081577.1	3820001	3840000	176	3679.56	0.57652
108	NW_005081577.1	3800001	3820000	128	4909.1	0.366177
109	NW_005081577.1	3780001	3800000	213	3205.36	0.674354
110	NW_005081577.1	3760001	3780000	204	3373.49	0.640811
111	NW_005081577.1	3740001	3760000	171	4151.35	0.491964
112	NW_005081577.1	3720001	3740000	102	6634.51	0.11181
113	NW_005081577.1	3700001	3720000	66	7254.33	0.881771
114	NW_005081577.1	3680001	3700000	127	5784.31	0.211041
115	NW_005081577.1	3660001	3680000	117	5153.88	0.320755
116	NW_005081577.1	3640001	3660000	124	4796.9	0.380154
117	NW_005081577.1	3620001	3640000	102	6133.31	0.163522
118	NW_005081577.1	3600001	3620000	98	5304.2	0.995833
119	NW_005081577.1	3580001	3600000	80	13086	0.151562
120	NW_005081577.1	3560001	3580000	50	12361.9	0.208854
121	NW_005081577.1	3540001	3560000	94	6215.85	0.969792
122	NW_005081577.1	3520001	3540000	92	7711.79	0.835938
123	NW_005081577.1	3500001	3520000	23	11395	0.881497
124	NW_005081577.1	3480001	3500000	83	8631.86	0.704167
125	NW_005081577.1	3460001	3480000	70	7413.13	0.864583
126	NW_005081577.1	3440001	3460000	83	8395.65	0.741667
127	NW_005081577.1	3420001	3440000	86	8277.78	0.758854
128	NW_005081577.1	3400001	3420000	102	5943.91	0.183788
129	NW_005081577.1	3380001	3400000	82	6499.41	0.954688
130	NW_005081577.1	3360001	3380000	94	5759.07	0.984375
131	NW_005081577.1	3340001	3360000	118	5475.82	0.25856
132	NW_005081577.1	3320001	3340000	68	9944.2	0.494271
133	NW_005081577.1	3300001	3320000	92	6575.19	0.947396
134	NW_005081577.1	3280001	3300000	92	6440.62	0.961458
135	NW_005081577.1	3260001	3280000	83	6731.13	0.933854
136	NW_005081577.1	3240001	3260000	84	6527.81	0.950521
137	NW_005081577.1	3220001	3240000	78	7078.3	0.901042
138	NW_005081577.1	3200001	3220000	79	6885.08	0.920833
139	NW_005081577.1	3180001	3200000	74	7796.19	0.827604
140	NW_005081577.1	3160001	3180000	108	5092.03	0.330887
141	NW_005081577.1	3140001	3160000	96	6261.86	0.968229
142	NW_005081577.1	3120001	3140000	86	6536.94	0.949479
143	NW_005081577.1	3100001	3120000	114	6379.55	0.134172
144	NW_005081577.1	3080001	3100000	116	5128.58	0.327044
145	NW_005081577.1	3060001	3080000	118	5322.46	0.294899
146	NW_005081577.1	3040001	3060000	160	4404.79	0.445143
147	NW_005081577.1	3020001	3040000	146	4588.33	0.412299
148	NW_005081577.1	3000001	3020000	163	3543.54	0.603075
149	NW_005081577.1	2980001	3000000	113	5403.19	0.275332
150	NW_005081577.1	2960001	2980000	123	5609.72	0.236198
151	NW_005081577.1	2940001	2960000	149	4566.78	0.414396
152	NW_005081577.1	2920001	2940000	193	2688.36	0.785465
153	NW_005081577.1	2900001	2920000	169	3814.78	0.557652
154	NW_005081577.1	2880001	2900000	133	4813.63	0.377358
155	NW_005081577.1	2860001	2880000	135	5537.61	0.245283
156	NW_005081577.1	2840001	2860000	104	7127.25	0.0782669
157	NW_005081577.1	2820001	2840000	134	5933.43	0.185884
158	NW_005081577.1	2800001	2820000	125	4737.25	0.389937
159	NW_005081577.1	2780001	2800000	124	5287.37	0.29979
160	NW_005081577.1	2760001	2780000	129	4285.32	0.466806
161	NW_005081577.1	2740001	2760000	120	4779.07	0.38225
162	NW_005081577.1	2720001	2740000	158	5106	0.329839
163	NW_005081577.1	2700001	2720000	184	5062.49	0.337526
164	NW_005081577.1	2680001	2700000	209	3075.05	0.70021
165	NW_005081577.1	2660001	2680000	212	3131.22	0.686932
166	NW_005081577.1	2640001	2660000	227	2702.9	0.779175
167	NW_005081577.1	2620001	2640000	311	2147.9	0.90566
168	NW_005081577.1	2600001	2620000	190	3683.52	0.575821
169	NW_005081577.1	2580001	2600000	198	3366.12	0.643606
170	NW_005081577.1	2560001	2580000	168	3476.63	0.617051
171	NW_005081577.1	2540001	2560000	171	4080.38	0.508036
172	NW_005081577.1	2520001	2540000	178	5469.97	0.262055
173	NW_005081577.1	2500001	2520000	197	3237.32	0.669462
174	NW_005081577.1	2480001	2500000	123	5645.1	0.232006
175	NW_005081577.1	2460001	2480000	211	5583.84	0.238994
176	NW_005081577.1	2440001	2460000	199	4670.1	0.399022
177	NW_005081577.1	2420001	2440000	273	2565.91	0.819706
178	NW_005081577.1	2400001	2420000	312	2637.3	0.799441
179	NW_005081577.1	2380001	2400000	301	3336.85	0.65269
180	NW_005081577.1	2360001	2380000	350	2428.65	0.850454
181	NW_005081577.1	2340001	2360000	373	2819.77	0.761006
182	NW_005081577.1	2320001	2340000	253	3129.42	0.687631
183	NW_005081577.1	2300001	2320000	224	3420.22	0.626834
184	NW_005081577.1	2280001	2300000	306	2409.71	0.856744
185	NW_005081577.1	2260001	2280000	344	2631.81	0.801537
186	NW_005081577.1	2240001	2260000	261	3094.8	0.696017
187	NW_005081577.1	2220001	2240000	273	2286.54	0.878407
188	NW_005081577.1	2200001	2220000	347	2311.71	0.872816
189	NW_005081577.1	2180001	2200000	337	3594.08	0.59399
190	NW_005081577.1	2160001	2180000	309	1884.88	0.945493
191	NW_005081577.1	2140001	2160000	332	2536.5	0.824598
192	NW_005081577.1	2120001	2140000	332	2879.31	0.743536
193	NW_005081577.1	2100001	2120000	298	3502.19	0.614955
194	NW_005081577.1	2080001	2100000	263	3602.71	0.591195
195	NW_005081577.1	2060001	2080000	293	2286.39	0.879106
196	NW_005081577.1	2040001	2060000	345	1891.62	0.943396
197	NW_005081577.1	2020001	2040000	334	2719.26	0.77638
198	NW_005081577.1	2000001	2020000	235	2651.72	0.79385
199	NW_005081577.1	1980001	2000000	230	2854.14	0.751223
200	NW_005081577.1	1960001	1980000	388	2956.7	0.727463
201	NW_005081577.1	1940001	1960000	294	2833.69	0.756115
202	NW_005081577.1	1920001	1940000	180	4329.45	0.459119
203	NW_005081577.1	1900001	1920000	305	4039.29	0.515723
204	NW_005081577.1	1880001	1900000	224	3001.07	0.715584
205	NW_005081577.1	1860001	1880000	292	2424.41	0.851153
206	NW_005081577.1	1840001	1860000	268	4375.38	0.450035
207	NW_005081577.1	1820001	1840000	190	4697.88	0.393431
208	NW_005081577.1	1800001	1820000	207	3263.79	0.667365
209	NW_005081577.1	1780001	1800000	161	4020.56	0.519217
210	NW_005081577.1	1760001	1780000	254	2442.34	0.846261
211	NW_005081577.1	1740001	1760000	316	2453.83	0.843466
212	NW_005081577.1	1720001	1740000	299	2504.5	0.832285
213	NW_005081577.1	1700001	1720000	212	4381.67	0.448637
214	NW_005081577.1	1680001	1700000	139	7061.38	0.0845563
215	NW_005081577.1	1660001	1680000	192	5917.2	0.195667
216	NW_005081577.1	1640001	1660000	214	4297.1	0.46471
217	NW_005081577.1	1620001	1640000	215	2904.71	0.738644
218	NW_005081577.1	1600001	1620000	200	2343.74	0.865129
219	NW_005081577.1	1580001	1600000	172	4295.71	0.465409
220	NW_005081577.1	1560001	1580000	187	4078.73	0.508735
221	NW_005081577.1	1540001	1560000	190	3251.29	0.668064
222	NW_005081577.1	1520001	1540000	205	3667.64	0.577918
223	NW_005081577.1	1500001	1520000	198	3463.13	0.619846
224	NW_005081577.1	1480001	1500000	172	5702.1	0.222921
225	NW_005081577.1	1460001	1480000	140	5423.56	0.27044
226	NW_005081577.1	1440001	1460000	216	3633.02	0.584906
227	NW_005081577.1	1420001	1440000	173	4461.77	0.430468
228	NW_005081577.1	1400001	1420000	178	3645.02	0.582809
229	NW_005081577.1	1380001	1400000	129	5311.71	0.297694
230	NW_005081577.1	1360001	1380000	116	6226	0.150245
231	NW_005081577.1	1340001	1360000	101	7460.03	0.0649895
232	NW_005081577.1	1320001	1340000	55	7793.33	0.829167
233	NW_005081577.1	1300001	1320000	175	4864.82	0.368973
234	NW_005081577.1	1280001	1300000	127	5395.46	0.277428
235	NW_005081577.1	1260001	1280000	91	8070.39	0.790104
236	NW_005081577.1	1240001	1260000	130	6078.21	0.169811
237	NW_005081577.1	1220001	1240000	75	10164.7	0.457813
238	NW_005081577.1	1200001	1220000	109	6863.57	0.0971349
239	NW_005081577.1	1180001	1200000	55	13247.6	0.140625
240	NW_005081577.1	1160001	1180000	32	19407.8	0.293139
241	NW_005081577.1	1140001	1160000	16	24446	0.150728
242	NW_005081577.1	1120001	1140000	91	14808.9	0.0651042
243	NW_005081577.1	1100001	1120000	67	10941.5	0.357292
244	NW_005081577.1	1080001	1100000	107	9339.31	0.0181691
245	NW_005081577.1	1060001	1080000	121	20670.5	0.00419287
246	NW_005081577.1	1040001	1060000	14	33841.4	0.0317048
247	NW_005081577.1	1020001	1040000	7	34946.2	0.029106
248	NW_005081577.1	1000001	1020000	31	33287.5	0.0343035
249	NW_005081577.1	980001	1000000	44	18550	0.329002
250	NW_005081577.1	960001	980000	86	7402.44	0.865104
251	NW_005081577.1	940001	960000	65	8686.74	0.694271
252	NW_005081577.1	920001	940000	63	10538.8	0.408854
253	NW_005081577.1	900001	920000	40	16810.1	0.420478
254	NW_005081577.1	880001	900000	41	16462.9	0.43815
255	NW_005081577.1	860001	880000	60	8648.31	0.7
256	NW_005081577.1	840001	860000	59	10978.6	0.352083
257	NW_005081577.1	820001	840000	75	11609.4	0.279167
258	NW_005081577.1	800001	820000	85	8356.49	0.745833
259	NW_005081577.1	780001	800000	77	8467.73	0.730729
260	NW_005081577.1	760001	780000	54	14486.3	0.078125
261	NW_005081577.1	740001	760000	67	14428.6	0.0817708
262	NW_005081577.1	720001	740000	93	7589.64	0.846875
263	NW_005081577.1	700001	720000	111	5270.62	0.302586
264	NW_005081577.1	680001	700000	98	5981.78	0.976042
265	NW_005081577.1	660001	680000	57	9726.75	0.528646
266	NW_005081577.1	640001	660000	48	8812.89	0.989085
267	NW_005081577.1	620001	640000	50	10424.4	0.422917
268	NW_005081577.1	600001	620000	56	10202.9	0.453646
269	NW_005081577.1	580001	600000	72	8060.13	0.792188
270	NW_005081577.1	560001	580000	77	8381.92	0.743229
271	NW_005081577.1	540001	560000	81	8177.05	0.777604
272	NW_005081577.1	520001	540000	74	7963.28	0.805208
273	NW_005081577.1	500001	520000	98	6525.86	0.952083
274	NW_005081577.1	480001	500000	79	10063.2	0.480729
275	NW_005081577.1	460001	480000	47	11984.6	0.835759
276	NW_005081577.1	440001	460000	31	14429.4	0.602391
277	NW_005081577.1	420001	440000	93	6623.32	0.941146
278	NW_005081577.1	400001	420000	73	8809.2	0.680208
279	NW_005081577.1	380001	400000	134	6586.76	0.114605
280	NW_005081577.1	360001	380000	113	6793.46	0.103424
281	NW_005081577.1	340001	360000	77	8492.85	0.728125
282	NW_005081577.1	320001	340000	94	7844.07	0.822917
283	NW_005081577.1	300001	320000	62	10255.5	0.445312
284	NW_005081577.1	280001	300000	56	10833	0.370312
285	NW_005081577.1	260001	280000	68	10308.3	0.438542
286	NW_005081577.1	240001	260000	36	15501.4	0.514033
287	NW_005081577.1	220001	240000	45	13662.7	0.676715
288	NW_005081577.1	200001	220000	86	10830.3	0.370833
289	NW_005081577.1	180001	200000	92	9305.09	0.602083
290	NW_005081577.1	160001	180000	91	6819.95	0.925
291	NW_005081577.1	140001	160000	95	7340.33	0.871875
292	NW_005081577.1	120001	140000	54	11557	0.283333
293	NW_005081577.1	100001	120000	74	10381	0.427604
294	NW_005081577.1	80001	100000	52	15947.4	0.0401042
295	NW_005081577.1	60001	80000	39	18073.4	0.349792
296	NW_005081577.1	40001	60000	83	10928.2	0.359375
297	NW_005081577.1	20001	40000	75	7983.43	0.800521
298	NW_005081577.1	1	20000	44	7417.29	0.994283
299	NW_005081742.1	760001	780000	20	12680.5	0.777027
300	NW_005081742.1	740001	760000	17	20415	0.258316
301	NW_005081742.1	720001	740000	25	17920.1	0.356549
302	NW_005081742.1	700001	720000	30	23238.3	0.177235
303	NW_005081742.1	680001	700000	40	21919.1	0.2079
304	NW_005081742.1	660001	680000	24	22203.3	0.200104
305	NW_005081742.1	640001	660000	33	23797	0.164761
306	NW_005081742.1	620001	640000	39	22006.6	0.205301
307	NW_005081742.1	600001	620000	35	21238.1	0.225572
308	NW_005081742.1	580001	600000	26	24936.6	0.139813
309	NW_005081742.1	560001	580000	36	26914.2	0.10343
310	NW_005081742.1	540001	560000	30	26813.6	0.105509
311	NW_005081742.1	520001	540000	54	19288.3	0.0109375
312	NW_005081742.1	500001	520000	37	17904.2	0.357069
313	NW_005081742.1	480001	500000	31	18692.8	0.324844
314	NW_005081742.1	460001	480000	40	19127.6	0.307173
315	NW_005081742.1	440001	460000	26	29042.1	0.0764033
316	NW_005081742.1	420001	440000	24	30942.2	0.0530146
317	NW_005081742.1	400001	420000	17	31847.4	0.0472973
318	NW_005081742.1	380001	400000	36	32038.2	0.0446985
319	NW_005081742.1	360001	380000	19	30561.1	0.0576923
320	NW_005081742.1	340001	360000	23	30272.5	0.0639293
321	NW_005081742.1	320001	340000	21	26855.4	0.10499
322	NW_005081742.1	300001	320000	18	26255.9	0.112786
323	NW_005081742.1	280001	300000	16	28831	0.0784823
324	NW_005081742.1	260001	280000	21	35611	0.0265073
325	NW_005081742.1	240001	260000	19	38388.8	0.0161123
326	NW_005081742.1	220001	240000	14	39447.3	0.0140333
327	NW_005081742.1	200001	220000	26	25766.4	0.123181
328	NW_005081742.1	180001	200000	25	23824.4	0.162162
329	NW_005081742.1	160001	180000	20	23391.1	0.173077
330	NW_005081742.1	140001	160000	20	25395.5	0.130457
331	NW_005081742.1	120001	140000	24	25618.2	0.12526
332	NW_005081742.1	100001	120000	20	28140.6	0.0878378
333	NW_005081742.1	80001	100000	27	30711.5	0.0556133
334	NW_005081742.1	60001	80000	36	26146.6	0.115904
335	NW_005081742.1	40001	60000	28	23115.7	0.180353
336	NW_005081742.1	20001	40000	15	21444.2	0.219335
337	NW_005081742.1	1	20000	2	20422.4	0.257277
338	NW_005082170.1	20001	40000	9	15447.7	0.518191
339	NW_005082170.1	1	20000	12	17267.8	0.390333
340	NW_005081821.1	1	20000	9	26339.9	0.110187
341	NW_005081821.1	20001	40000	27	32301.7	0.0426195
342	NW_005081821.1	40001	60000	25	40851.3	0.0114345
343	NW_005081821.1	60001	80000	16	45168.5	0.00779626
344	NW_005081821.1	80001	100000	11	49850.9	0.00675676
345	NW_005081821.1	100001	120000	8	57884.1	0.00467775
346	NW_005081821.1	120001	140000	1	59315.8	0.004158
347	NW_005081821.1	140001	160000	19	43327.9	0.00831601
348	NW_005081821.1	160001	180000	19	36382.5	0.0239085
349	NW_005081821.1	180001	200000	17	41205.6	0.010395
350	NW_005081821.1	200001	220000	24	36860.9	0.022869
351	NW_005081821.1	220001	240000	16	33404.4	0.0337838
352	NW_005081821.1	240001	260000	22	32631	0.0389813
353	NW_005081821.1	260001	280000	27	28000.8	0.0899168
354	NW_005081821.1	280001	300000	11	30849.4	0.0540541
355	NW_005081821.1	300001	320000	21	30544.6	0.0592516
356	NW_005081821.1	320001	340000	16	31841.7	0.047817
357	NW_005081821.1	340001	360000	18	26501.3	0.108628
358	NW_005081821.1	360001	380000	33	22171.4	0.201663
359	NW_005081821.1	380001	400000	22	20868.3	0.241164
360	NW_005081821.1	400001	420000	18	14831.7	0.563929
361	NW_005082055.1	40001	60000	1	14873.9	0.559771
362	NW_005082055.1	20001	40000	18	24273.4	0.152807
363	NW_005082055.1	1	20000	19	22845.8	0.18659
364	NW_005081832.1	1	20000	21	34680.6	0.0306653
365	NW_005081832.1	20001	40000	10	35660.1	0.0259875
366	NW_005081832.1	40001	60000	16	32599.7	0.039501
367	NW_005081832.1	60001	80000	19	28131.4	0.0883576
368	NW_005081832.1	80001	100000	37	20360.5	0.260395
369	NW_005081832.1	100001	120000	28	20801.4	0.244802
370	NW_005081832.1	120001	140000	31	22678.4	0.189709
371	NW_005081832.1	140001	160000	27	24487.1	0.149168
372	NW_005081832.1	160001	180000	19	27625.9	0.0945946
373	NW_005081832.1	180001	200000	22	27653.7	0.0935551
374	NW_005081832.1	200001	220000	25	25189.2	0.135135
375	NW_005081832.1	220001	240000	28	25599.5	0.12578
376	NW_005081832.1	240001	260000	22	27010.8	0.101871
377	NW_005081832.1	260001	280000	21	21731.5	0.213098
378	NW_005081832.1	280001	300000	26	19657.9	0.282744
379	NW_005081832.1	300001	320000	30	15880	0.483368
380	NW_005081832.1	320001	340000	28	16785.5	0.423077
381	NW_005081832.1	340001	360000	14	10354.5	0.947505
382	NW_005081548.1	1	20000	25	19500.8	0.288981
383	NW_005081548.1	20001	40000	31	18891.1	0.316528
384	NW_005081548.1	40001	60000	36	16252	0.45738
385	NW_005081548.1	60001	80000	24	21082	0.231809
386	NW_005081548.1	80001	100000	21	22343.2	0.196466
387	NW_005081548.1	100001	120000	34	24383.4	0.151767
388	NW_005081548.1	120001	140000	19	23808.2	0.163202
389	NW_005081548.1	140001	160000	31	21410	0.220374
390	NW_005081548.1	160001	180000	22	37716.2	0.0181913
391	NW_005081548.1	180001	200000	14	36982	0.0213098
392	NW_005081548.1	200001	220000	20	27161.4	0.0997921
393	NW_005081548.1	220001	240000	24	30490.1	0.0613306
394	NW_005081548.1	240001	260000	20	29160.3	0.0753638
395	NW_005081548.1	260001	280000	23	25951.7	0.117983
396	NW_005081548.1	280001	300000	39	22238	0.198545
397	NW_005081548.1	300001	320000	28	20637.7	0.25104
398	NW_005081548.1	320001	340000	40	17762.1	0.364865
399	NW_005081548.1	340001	360000	45	41396.2	0.00987526
400	NW_005081548.1	360001	380000	3	41929.7	0.00883576
401	NW_005081548.1	380001	400000	7	47456.7	0.00727651
402	NW_005081548.1	400001	420000	11	37714	0.018711
403	NW_005081548.1	420001	440000	35	23496.7	0.168919
404	NW_005081548.1	440001	460000	29	31849.8	0.0467775
405	NW_005081548.1	460001	480000	26	33146.2	0.035343
406	NW_005081548.1	480001	500000	26	30494.4	0.0608108
407	NW_005081548.1	500001	520000	29	26993.4	0.102391
408	NW_005081548.1	520001	540000	25	26409.5	0.109667
409	NW_005081548.1	540001	560000	31	28174.6	0.0873181
410	NW_005081548.1	560001	580000	17	30747.1	0.0545738
411	NW_005081548.1	580001	600000	18	29895.8	0.0670478
412	NW_005081548.1	600001	620000	26	27793.6	0.0930353
413	NW_005081548.1	620001	640000	38	15404.7	0.522869
414	NW_005081548.1	640001	660000	31	24857.2	0.142412
415	NW_005081548.1	660001	680000	20	27420.7	0.0971933
416	NW_005081548.1	680001	700000	22	25379	0.131497
417	NW_005081548.1	700001	720000	31	15994.5	0.476611
418	NW_005081548.1	720001	740000	44	16679.1	0.426715
419	NW_005081548.1	740001	760000	42	16814.9	0.419439
420	NW_005081548.1	760001	780000	27	17192.2	0.39501
421	NW_005081548.1	780001	800000	28	19586.9	0.285343
422	NW_005081548.1	800001	820000	23	24199.6	0.153326
423	NW_005081548.1	820001	840000	22	28500.2	0.0841996
424	NW_005081548.1	840001	860000	25	25769.6	0.122661
425	NW_005081548.1	860001	880000	29	21188.7	0.227131
426	NW_005081548.1	880001	900000	21	20323.3	0.261954
427	NW_005081548.1	900001	920000	41	19062.6	0.310811
428	NW_005081548.1	920001	940000	33	17866.1	0.359148
429	NW_005081548.1	940001	960000	29	19285.7	0.298857
430	NW_005081548.1	960001	980000	21	21141.4	0.22869
431	NW_005081548.1	980001	1000000	28	21006.1	0.235447
432	NW_005081548.1	1000001	1020000	25	21090.9	0.231289
433	NW_005081548.1	1020001	1040000	25	20445.6	0.254678
434	NW_005081548.1	1040001	1060000	21	30226.1	0.0644491
435	NW_005081548.1	1060001	1080000	30	27254.2	0.0982328
436	NW_005081548.1	1080001	1100000	23	25822.6	0.120582
437	NW_005081548.1	1100001	1120000	18	25473.2	0.127859
438	NW_005081548.1	1120001	1140000	46	18386.3	0.33368
439	NW_005081548.1	1140001	1160000	22	24024.9	0.158524
440	NW_005081548.1	1160001	1180000	27	22294.7	0.196985
441	NW_005081548.1	1180001	1200000	30	20728.6	0.247401
442	NW_005081548.1	1200001	1220000	22	21430.6	0.219854
443	NW_005081548.1	1220001	1240000	30	19908.5	0.273389
444	NW_005081548.1	1240001	1260000	32	19995.1	0.27027
445	NW_005081548.1	1260001	1280000	24	20624.7	0.252079
446	NW_005081548.1	1280001	1300000	29	20784.6	0.245322
447	NW_005081548.1	1300001	1320000	45	17835.2	0.360707
448	NW_005081548.1	1320001	1340000	25	20419.5	0.257796
449	NW_005081548.1	1340001	1360000	36	22462.8	0.193867
450	NW_005081548.1	1360001	1380000	20	23172.3	0.178794
451	NW_005081548.1	1380001	1400000	28	18349.8	0.336279
452	NW_005081548.1	1400001	1420000	35	21789.2	0.211538
453	NW_005081548.1	1420001	1440000	15	26288.9	0.111746
454	NW_005081548.1	1440001	1460000	25	24177.6	0.153846
455	NW_005081548.1	1460001	1480000	25	23430.7	0.169958
456	NW_005081548.1	1480001	1500000	21	21032.1	0.233888
457	NW_005081548.1	1500001	1520000	27	25589.5	0.126299
458	NW_005081548.1	1520001	1540000	20	24755.8	0.14553
459	NW_005081548.1	1540001	1560000	25	24924.3	0.140333
460	NW_005081548.1	1560001	1580000	25	26143.7	0.116424
461	NW_005081548.1	1580001	1600000	25	25857.1	0.119543
462	NW_005081548.1	1600001	1620000	27	19731.8	0.279106
463	NW_005081548.1	1620001	1640000	30	19911.9	0.272869
464	NW_005081548.1	1640001	1660000	17	25707.1	0.12422
465	NW_005081548.1	1660001	1680000	26	29829.9	0.0686071
466	NW_005081548.1	1680001	1700000	14	26319.3	0.110707
467	NW_005081548.1	1700001	1720000	29	24987.7	0.138254
468	NW_005081548.1	1720001	1740000	25	23810.1	0.162682
469	NW_005081548.1	1740001	1760000	26	17832.6	0.361227
470	NW_005081548.1	1760001	1780000	27	14314.1	0.614345
471	NW_005081548.1	1780001	1800000	34	20829.5	0.243243
472	NW_005081548.1	1800001	1820000	26	20455.7	0.254158
473	NW_005081548.1	1820001	1840000	20	23722.8	0.16684
474	NW_005081548.1	1840001	1860000	27	21455.7	0.218815
475	NW_005081548.1	1860001	1880000	19	32515.7	0.0410603
476	NW_005081548.1	1880001	1900000	18	34718.2	0.0301455
477	NW_005081548.1	1900001	1920000	22	37077.5	0.02079
478	NW_005081548.1	1920001	1940000	22	33275.1	0.0348233
479	NW_005081548.1	1940001	1960000	22	36101.4	0.024948
480	NW_005081548.1	1960001	1980000	13	34294.3	0.031185
481	NW_005081548.1	1980001	2000000	28	32515.3	0.04158
482	NW_005081548.1	2000001	2020000	28	25820	0.121622
483	NW_005081548.1	2020001	2040000	25	28768.4	0.0795218
484	NW_005081548.1	2040001	2060000	24	30744.2	0.0550936
485	NW_005081548.1	2060001	2080000	27	27872.3	0.0925156
486	NW_005081548.1	2080001	2100000	26	25621.4	0.12474
487	NW_005081548.1	2100001	2120000	24	25113	0.136175
488	NW_005081548.1	2120001	2140000	31	24485.4	0.149688
489	NW_005081548.1	2140001	2160000	22	23564.5	0.167879
490	NW_005081548.1	2160001	2180000	28	25498.9	0.126819
491	NW_005081548.1	2180001	2200000	28	32132.9	0.0441788
492	NW_005081548.1	2200001	2220000	17	37803.8	0.0176715
493	NW_005081548.1	2220001	2240000	23	32844.6	0.0384615
494	NW_005081548.1	2240001	2260000	25	31900.9	0.045738
495	NW_005081548.1	2260001	2280000	19	38586.5	0.0155925
496	NW_005081548.1	2280001	2300000	16	37248.6	0.0197505
497	NW_005081548.1	2300001	2320000	36	26112.5	0.116944
498	NW_005081548.1	2320001	2340000	28	25339	0.132536
499	NW_005081548.1	2340001	2360000	29	19426.5	0.2921
500	NW_005081548.1	2360001	2380000	47	15388.8	0.525988
501	NW_005081548.1	2380001	2400000	32	24119.8	0.156445
502	NW_005081548.1	2400001	2420000	25	28630.6	0.0810811
503	NW_005081548.1	2420001	2440000	27	25274.2	0.133056
504	NW_005081548.1	2440001	2460000	21	27475.7	0.0961538
505	NW_005081548.1	2460001	2480000	20	28498.2	0.0847193
506	NW_005081548.1	2480001	2500000	24	28904.9	0.0779626
507	NW_005081548.1	2500001	2520000	27	22206.7	0.199584
508	NW_005081548.1	2520001	2540000	47	21923.9	0.20738
509	NW_005081548.1	2540001	2560000	25	26303.8	0.111227
510	NW_005081548.1	2560001	2580000	23	24042	0.157484
511	NW_005081548.1	2580001	2600000	33	27973.9	0.0909563
512	NW_005081548.1	2600001	2620000	32	24451.5	0.150208
513	NW_005081548.1	2620001	2640000	35	25810.3	0.122141
514	NW_005081548.1	2640001	2660000	21	30500.2	0.0602911
515	NW_005081548.1	2660001	2680000	21	29530.9	0.0727651
516	NW_005081548.1	2680001	2700000	20	24997.8	0.137734
517	NW_005081548.1	2700001	2720000	34	24693.8	0.14605
518	NW_005081548.1	2720001	2740000	25	28995.9	0.0769231
519	NW_005081548.1	2740001	2760000	21	27920.9	0.0919958
520	NW_005081548.1	2760001	2780000	32	23340.4	0.174636
521	NW_005081548.1	2780001	2800000	31	21050.7	0.232848
522	NW_005081548.1	2800001	2820000	29	22887.4	0.185031
523	NW_005081548.1	2820001	2840000	29	22173.9	0.201143
524	NW_005081548.1	2840001	2860000	31	22180.5	0.200624
525	NW_005081548.1	2860001	2880000	22	22440.3	0.194387
526	NW_005081548.1	2880001	2900000	27	30550.7	0.0587318
527	NW_005081548.1	2900001	2920000	25	32954.7	0.0363825
528	NW_005081548.1	2920001	2940000	20	32520	0.0405405
529	NW_005081548.1	2940001	2960000	15	28769.5	0.0790021
530	NW_005081548.1	2960001	2980000	17	27941.6	0.0914761
531	NW_005081548.1	2980001	3000000	20	23294.9	0.175676
532	NW_005081548.1	3000001	3020000	27	19457.2	0.290541
533	NW_005081548.1	3020001	3040000	26	24080.7	0.156965
534	NW_005081548.1	3040001	3060000	24	25408.6	0.129938
535	NW_005081548.1	3060001	3080000	21	30619.3	0.0566528
536	NW_005081548.1	3080001	3100000	12	33780.8	0.0322245
537	NW_005081548.1	3100001	3120000	20	30696.7	0.0561331
538	NW_005081548.1	3120001	3140000	29	32017.8	0.0452183
539	NW_005081548.1	3140001	3160000	16	31868.9	0.0462578
540	NW_005081548.1	3160001	3180000	26	28600.3	0.0821206
541	NW_005081548.1	3180001	3200000	31	28240.7	0.0867983
542	NW_005081548.1	3200001	3220000	20	29941.1	0.0660083
543	NW_005081548.1	3220001	3240000	18	29779.8	0.0701663
544	NW_005081548.1	3240001	3260000	36	26977.8	0.102911
545	NW_005081548.1	3260001	3280000	23	24330.6	0.152287
546	NW_005081548.1	3280001	3300000	30	24384.5	0.151247
547	NW_005081548.1	3300001	3320000	28	22403.8	0.195426
548	NW_005081548.1	3320001	3340000	27	21187	0.227651
549	NW_005081548.1	3340001	3360000	33	21875.9	0.209979
550	NW_005081548.1	3360001	3380000	28	27331.3	0.0977131
551	NW_005081548.1	3380001	3400000	23	27998.6	0.0904366
552	NW_005081548.1	3400001	3420000	26	26066.3	0.117464
553	NW_005081548.1	3420001	3440000	25	32920.4	0.0369023
554	NW_005081548.1	3440001	3460000	26	36187.6	0.0244283
555	NW_005081548.1	3460001	3480000	16	39834.7	0.0135135
556	NW_005081548.1	3480001	3500000	12	40800.3	0.0119543
557	NW_005081548.1	3500001	3520000	22	34769.6	0.0296258
558	NW_005081548.1	3520001	3540000	21	31107.5	0.0524948
559	NW_005081548.1	3540001	3560000	20	31455.6	0.0509356
560	NW_005081548.1	3560001	3580000	18	32180.9	0.043659
561	NW_005081548.1	3580001	3600000	23	30062.7	0.0649688
562	NW_005081548.1	3600001	3620000	17	28514.7	0.0836798
563	NW_005081548.1	3620001	3640000	34	25342.5	0.132017
564	NW_005081548.1	3640001	3660000	20	30558.9	0.0582121
565	NW_005081548.1	3660001	3680000	18	31163.3	0.0519751
566	NW_005081548.1	3680001	3700000	20	32860.1	0.0379418
567	NW_005081548.1	3700001	3720000	20	35218.4	0.0280665
568	NW_005081548.1	3720001	3740000	30	32565.9	0.0400208
569	NW_005081548.1	3740001	3760000	28	26630.4	0.106549
570	NW_005081548.1	3760001	3780000	39	24123.8	0.155405
571	NW_005081548.1	3780001	3800000	37	24767.1	0.14501
572	NW_005081548.1	3800001	3820000	27	24547.9	0.148129
573	NW_005081548.1	3820001	3840000	20	24796	0.143451
574	NW_005081548.1	3840001	3860000	29	21615.8	0.217256
575	NW_005081548.1	3860001	3880000	17	21008	0.234927
576	NW_005081548.1	3880001	3900000	27	25271.6	0.133576
577	NW_005081548.1	3900001	3920000	35	23740.1	0.16632
578	NW_005081548.1	3920001	3940000	21	20984.6	0.235967
579	NW_005081548.1	3940001	3960000	27	20715.4	0.248441
580	NW_005081548.1	3960001	3980000	39	19674.3	0.281705
581	NW_005081548.1	3980001	4000000	18	24562.8	0.147609
582	NW_005081548.1	4000001	4020000	38	19452.1	0.29106
583	NW_005081548.1	4020001	4040000	36	15735.9	0.493243
584	NW_005081548.1	4040001	4060000	25	16334.9	0.448545
585	NW_005081548.1	4060001	4080000	22	21722.3	0.214137
586	NW_005081548.1	4080001	4100000	42	18521.2	0.330561
587	NW_005081548.1	4100001	4120000	35	15734.4	0.493763
588	NW_005081548.1	4120001	4140000	46	19673.9	0.282225
589	NW_005081548.1	4140001	4160000	28	22483.9	0.193347
590	NW_005081548.1	4160001	4180000	42	17646.7	0.371622
591	NW_005081548.1	4180001	4200000	37	17590.1	0.37422
592	NW_005081548.1	4200001	4220000	49	13729.6	0.668399
593	NW_005081548.1	4220001	4240000	38	17469.5	0.379938
594	NW_005081548.1	4240001	4260000	31	18375.3	0.3342
595	NW_005081548.1	4260001	4280000	49	17678.6	0.369543
596	NW_005081548.1	4280001	4300000	33	18605.2	0.328482
597	NW_005081548.1	4300001	4320000	40	20559.6	0.253119
598	NW_005081548.1	4320001	4340000	50	18665.9	0.015625
599	NW_005081548.1	4340001	4360000	36	16713.3	0.425676
600	NW_005081548.1	4360001	4380000	36	14312.9	0.614865
601	NW_005081548.1	4380001	4400000	45	14080.2	0.639813
602	NW_005081548.1	4400001	4420000	48	13247.7	0.721414
603	NW_005081548.1	4420001	4440000	38	14856	0.56185
604	NW_005081548.1	4440001	4460000	45	13514.1	0.693347
605	NW_005081548.1	4460001	4480000	52	12122.9	0.230208
606	NW_005081548.1	4480001	4500000	53	10892.9	0.363021
607	NW_005081548.1	4500001	4520000	47	12225.8	0.818087
608	NW_005081548.1	4520001	4540000	44	13368.1	0.711019
609	NW_005081548.1	4540001	4560000	39	10612.1	0.931913
610	NW_005081548.1	4560001	4580000	55	12204.8	0.221875
611	NW_005081548.1	4580001	4600000	45	14760.3	0.567568
612	NW_005081548.1	4600001	4620000	47	11615.9	0.866424
613	NW_005081548.1	4620001	4640000	42	11603.8	0.867464
614	NW_005081548.1	4640001	4660000	52	9722.58	0.530208
615	NW_005081548.1	4660001	4680000	29	16193.2	0.461538
616	NW_005081548.1	4680001	4700000	55	16240.2	0.0375
617	NW_005081548.1	4700001	4720000	80	9082.87	0.634375
618	NW_005081548.1	4720001	4740000	69	8102.79	0.786458
619	NW_005081548.1	4740001	4760000	53	9562.55	0.557292
620	NW_005081548.1	4760001	4780000	48	8653.44	0.991164
621	NW_005081548.1	4780001	4800000	65	6841.46	0.922396
622	NW_005081548.1	4800001	4820000	69	8425.23	0.736458
623	NW_005081548.1	4820001	4840000	76	8821.85	0.678125
624	NW_005081548.1	4840001	4860000	38	12476.8	0.795218
625	NW_005081548.1	4860001	4880000	54	11844	0.25625
626	NW_005081548.1	4880001	4900000	71	9624.22	0.546354
627	NW_005081548.1	4900001	4920000	60	10987.9	0.35
628	NW_005081548.1	4920001	4940000	35	14223.2	0.62526
629	NW_005081548.1	4940001	4960000	39	17487.8	0.378898
630	NW_005081548.1	4960001	4980000	54	20114	0.009375
631	NW_005081548.1	4980001	5000000	31	23446.6	0.169439
632	NW_005081548.1	5000001	5020000	55	18420.3	0.0171875
633	NW_005081548.1	5020001	5040000	47	17254.7	0.391372
634	NW_005081548.1	5040001	5060000	60	16532.7	0.0322917
635	NW_005081548.1	5060001	5080000	49	16059.2	0.472453
636	NW_005081548.1	5080001	5100000	46	16695.4	0.426195
637	NW_005081548.1	5100001	5120000	54	15136.4	0.0604167
638	NW_005081548.1	5120001	5140000	69	15663.6	0.0442708
639	NW_005081548.1	5140001	5160000	63	15271.6	0.0552083
640	NW_005081548.1	5160001	5180000	58	13129.5	0.148438
641	NW_005081548.1	5180001	5200000	60	13425.3	0.129167
642	NW_005081548.1	5200001	5220000	38	21710.7	0.214657
643	NW_005081548.1	5220001	5240000	55	21475.2	0.00677083
644	NW_005081548.1	5240001	5260000	38	20727.1	0.247921
645	NW_005081548.1	5260001	5280000	62	17715.7	0.0239583
646	NW_005081548.1	5280001	5300000	54	15255.7	0.0567708
647	NW_005081548.1	5300001	5320000	42	15368	0.527027
648	NW_005081548.1	5320001	5340000	64	13784.6	0.1125
649	NW_005081548.1	5340001	5360000	58	14224	0.090625
650	NW_005081548.1	5360001	5380000	65	12755.8	0.172396
651	NW_005081548.1	5380001	5400000	75	12940.1	0.159375
652	NW_005081548.1	5400001	5420000	54	14763.6	0.0677083
653	NW_005081548.1	5420001	5440000	58	22250.4	0.00520833
654	NW_005081548.1	5440001	5460000	40	21872	0.210499
655	NW_005081548.1	5460001	5480000	61	19514.5	0.00989583
656	NW_005081548.1	5480001	5500000	51	18950.1	0.0140625
657	NW_005081548.1	5500001	5520000	47	18945.6	0.314449
658	NW_005081548.1	5520001	5540000	54	19221.6	0.0114583
659	NW_005081548.1	5540001	5560000	65	13964.2	0.103646
660	NW_005081548.1	5560001	5580000	58	14391.6	0.0838542
661	NW_005081548.1	5580001	5600000	79	16453.4	0.0338542
662	NW_005081548.1	5600001	5620000	63	17912.7	0.021875
663	NW_005081548.1	5620001	5640000	44	19294.1	0.297817
664	NW_005081548.1	5640001	5660000	59	16811.1	0.0302083
665	NW_005081548.1	5660001	5680000	70	8638.33	0.702083
666	NW_005081548.1	5680001	5700000	60	10797.6	0.375521
667	NW_005081548.1	5700001	5720000	68	9320.24	0.599479
668	NW_005081548.1	5720001	5740000	55	10874.9	0.366146
669	NW_005081548.1	5740001	5760000	78	8285.53	0.756771
670	NW_005081548.1	5760001	5780000	68	7354.95	0.870313
671	NW_005081548.1	5780001	5800000	79	7104.41	0.897917
672	NW_005081548.1	5800001	5820000	55	9804.34	0.515104
673	NW_005081548.1	5820001	5840000	39	12664.1	0.778586
674	NW_005081548.1	5840001	5860000	52	11599.6	0.280208
675	NW_005081548.1	5860001	5880000	67	11368.6	0.302083
676	NW_005081548.1	5880001	5900000	52	12174.6	0.224479
677	NW_005081548.1	5900001	5920000	60	13714.1	0.117708
678	NW_005081548.1	5920001	5940000	60	11539.8	0.2875
679	NW_005081548.1	5940001	5960000	52	13091.4	0.150521
680	NW_005081548.1	5960001	5980000	68	12344.7	0.209896
681	NW_005081548.1	5980001	6000000	68	12383.4	0.205208
682	NW_005081548.1	6000001	6020000	56	13539.8	0.124479
683	NW_005081548.1	6020001	6040000	61	13437.3	0.127604
684	NW_005081548.1	6040001	6060000	70	12980.8	0.15625
685	NW_005081548.1	6060001	6080000	71	13231.9	0.141146
686	NW_005081548.1	6080001	6100000	65	11309.2	0.310937
687	NW_005081548.1	6100001	6120000	77	8956.71	0.658333
688	NW_005081548.1	6120001	6140000	87	8954	0.658854
689	NW_005081548.1	6140001	6160000	73	8534.72	0.721875
690	NW_005081548.1	6160001	6180000	62	9326.49	0.597396
691	NW_005081548.1	6180001	6200000	69	10265.6	0.443229
692	NW_005081548.1	6200001	6220000	77	11646.8	0.276042
693	NW_005081548.1	6220001	6240000	55	12770.7	0.170313
694	NW_005081548.1	6240001	6260000	47	14272.7	0.618763
695	NW_005081548.1	6260001	6280000	51	13347.7	0.134375
696	NW_005081548.1	6280001	6300000	53	13192.1	0.144792
697	NW_005081548.1	6300001	6320000	69	10571.3	0.404427
698	NW_005081548.1	6320001	6340000	55	11385.2	0.300521
699	NW_005081548.1	6340001	6360000	63	8701.44	0.691667
700	NW_005081548.1	6360001	6380000	57	10614.8	0.396354
701	NW_005081548.1	6380001	6400000	54	12426.2	0.200521
702	NW_005081548.1	6400001	6420000	42	13103.3	0.731809
703	NW_005081548.1	6420001	6440000	53	13218.8	0.142187
704	NW_005081548.1	6440001	6460000	34	14731.4	0.570686
705	NW_005081548.1	6460001	6480000	44	12536.8	0.788462
706	NW_005081548.1	6480001	6500000	53	11196.7	0.325521
707	NW_005081548.1	6500001	6520000	45	10704.7	0.926195
708	NW_005081548.1	6520001	6540000	56	9343.31	0.594271
709	NW_005081548.1	6540001	6560000	47	9798.81	0.974012
710	NW_005081548.1	6560001	6580000	53	9503.08	0.566667
711	NW_005081548.1	6580001	6600000	34	15226.1	0.536383
712	NW_005081548.1	6600001	6620000	41	13578.3	0.688669
713	NW_005081548.1	6620001	6640000	42	10582.8	0.935551
714	NW_005081548.1	6640001	6660000	37	12514	0.79106
715	NW_005081548.1	6660001	6680000	53	12329.6	0.211979
716	NW_005081548.1	6680001	6700000	64	13105	0.148958
717	NW_005081548.1	6700001	6720000	51	13981.3	0.102604
718	NW_005081548.1	6720001	6740000	47	15141.9	0.540021
719	NW_005081548.1	6740001	6760000	41	13837.4	0.659044
720	NW_005081548.1	6760001	6780000	44	12288	0.810291
721	NW_005081548.1	6780001	6800000	60	12426	0.201042
722	NW_005081548.1	6800001	6820000	39	15771.2	0.490125
723	NW_005081548.1	6820001	6840000	46	14887.5	0.558212
724	NW_005081548.1	6840001	6860000	43	13631.6	0.680873
725	NW_005081548.1	6860001	6880000	35	15772.5	0.489605
726	NW_005081548.1	6880001	6900000	39	13542.7	0.690748
727	NW_005081548.1	6900001	6920000	46	12530.3	0.790021
728	NW_005081548.1	6920001	6940000	34	14035.2	0.644491
729	NW_005081548.1	6940001	6960000	45	11450.2	0.87526
730	NW_005081548.1	6960001	6980000	42	10392.5	0.946985
731	NW_005081548.1	6980001	7000000	51	11491.4	0.291667
732	NW_005081548.1	7000001	7020000	62	10637.1	0.394271
733	NW_005081548.1	7020001	7040000	64	11810.3	0.259896
734	NW_005081548.1	7040001	7060000	79	6912.08	0.917188
735	NW_005081548.1	7060001	7080000	70	11233.5	0.322396
736	NW_005081548.1	7080001	7100000	39	13053.9	0.740125
737	NW_005081548.1	7100001	7120000	85	11206.9	0.324479
738	NW_005081548.1	7120001	7140000	58	8002.92	0.797917
739	NW_005081548.1	7140001	7160000	82	6758.1	0.930208
740	NW_005081548.1	7160001	7180000	79	7887.22	0.817708
741	NW_005081548.1	7180001	7200000	53	9167.14	0.621354
742	NW_005081548.1	7200001	7220000	86	8398.63	0.741146
743	NW_005081548.1	7220001	7240000	93	7123.73	0.894792
744	NW_005081548.1	7240001	7260000	96	6885.78	0.920312
745	NW_005081548.1	7260001	7280000	82	6265.67	0.967708
746	NW_005081548.1	7280001	7300000	105	10707.3	0.0118798
747	NW_005081548.1	7300001	7320000	39	16017	0.474532
748	NW_005081548.1	7320001	7340000	80	14739	0.0697917
749	NW_005081548.1	7340001	7360000	107	8567.4	0.0286513
750	NW_005081548.1	7360001	7380000	103	8218.52	0.037037
751	NW_005081548.1	7380001	7400000	85	7364.7	0.86875
752	NW_005081548.1	7400001	7420000	85	9056.72	0.639583
753	NW_005081548.1	7420001	7440000	75	9013.38	0.648958
754	NW_005081548.1	7440001	7460000	68	10716.4	0.384896
755	NW_005081548.1	7460001	7480000	55	9859.47	0.506771
756	NW_005081548.1	7480001	7500000	63	7806.28	0.826042
757	NW_005081548.1	7500001	7520000	50	10659.5	0.389583
758	NW_005081548.1	7520001	7540000	58	10114.5	0.468229
759	NW_005081548.1	7540001	7560000	62	8183.05	0.775
760	NW_005081548.1	7560001	7580000	82	8792.24	0.683333
761	NW_005081548.1	7580001	7600000	57	12287.5	0.215625
762	NW_005081548.1	7600001	7620000	52	13083.5	0.152344
763	NW_005081548.1	7620001	7640000	70	10820.4	0.372396
764	NW_005081548.1	7640001	7660000	48	12691.2	0.775468
765	NW_005081548.1	7660001	7680000	70	9773.52	0.517969
766	NW_005081548.1	7680001	7700000	60	12068.2	0.234896
767	NW_005081548.1	7700001	7720000	51	9836.05	0.509896
768	NW_005081548.1	7720001	7740000	60	9404.45	0.579688
769	NW_005081548.1	7740001	7760000	65	7774.78	0.832812
770	NW_005081548.1	7760001	7780000	62	9176.71	0.618229
771	NW_005081548.1	7780001	7800000	63	10133.2	0.4625
772	NW_005081548.1	7800001	7820000	30	20162.4	0.265593
773	NW_005081548.1	7820001	7840000	12	23789.6	0.165281
774	NW_005081548.1	7840001	7860000	47	13959.4	0.653326
775	NW_005081548.1	7860001	7880000	58	7416.83	0.864062
776	NW_005081548.1	7880001	7900000	44	11216.1	0.891892
777	NW_005081548.1	7900001	7920000	53	11791.9	0.260937
778	NW_005081548.1	7920001	7940000	60	9414.22	0.577604
779	NW_005081548.1	7940001	7960000	71	9268.43	0.60625
780	NW_005081548.1	7960001	7980000	47	10642	0.929314
781	NW_005081548.1	7980001	8000000	65	9074.24	0.636979
782	NW_005081548.1	8000001	8020000	56	10952.6	0.355729
783	NW_005081548.1	8020001	8040000	46	11632.1	0.863306
784	NW_005081548.1	8040001	8060000	54	12209.8	0.221354
785	NW_005081548.1	8060001	8080000	48	12616.1	0.780665
786	NW_005081548.1	8080001	8100000	67	7173.09	0.888542
787	NW_005081548.1	8100001	8120000	93	7122.94	0.895312
788	NW_005081548.1	8120001	8140000	65	8817.57	0.678646
789	NW_005081548.1	8140001	8160000	86	6761.21	0.929688
790	NW_005081548.1	8160001	8180000	90	6526.82	0.951562
791	NW_005081548.1	8180001	8200000	63	6967.96	0.9125
792	NW_005081548.1	8200001	8220000	87	8095.69	0.788021
793	NW_005081548.1	8220001	8240000	63	9365.08	0.5875
794	NW_005081548.1	8240001	8260000	73	8590.44	0.713542
795	NW_005081548.1	8260001	8280000	52	10069.2	0.478646
796	NW_005081548.1	8280001	8300000	87	8337.45	0.748958
797	NW_005081548.1	8300001	8320000	33	20442.6	0.255977
798	NW_005081548.1	8320001	8340000	49	18320.9	0.339397
799	NW_005081548.1	8340001	8360000	71	7616.98	0.846354
800	NW_005081548.1	8360001	8380000	68	7014.61	0.907292
801	NW_005081548.1	8380001	8400000	56	7698.79	0.838021
802	NW_005081548.1	8400001	8420000	51	9761.64	0.521354
803	NW_005081548.1	8420001	8440000	78	6902.45	0.918229
804	NW_005081548.1	8440001	8460000	70	9309.73	0.601562
805	NW_005081548.1	8460001	8480000	79	7789.21	0.830729
806	NW_005081548.1	8480001	8500000	71	8311.9	0.753646
807	NW_005081548.1	8500001	8520000	74	7050.75	0.903125
808	NW_005081548.1	8520001	8540000	67	8277.05	0.759375
809	NW_005081548.1	8540001	8560000	66	8321.15	0.752083
810	NW_005081548.1	8560001	8580000	56	11708	0.269792
811	NW_005081548.1	8580001	8600000	75	9738.72	0.526563
812	NW_005081548.1	8600001	8620000	74	8303.03	0.754687
813	NW_005081548.1	8620001	8640000	100	9091.91	0.0216632
814	NW_005081548.1	8640001	8660000	97	8963.91	0.65625
815	NW_005081548.1	8660001	8680000	77	8834.73	0.676042
816	NW_005081548.1	8680001	8700000	73	9292.53	0.602604
817	NW_005081548.1	8700001	8720000	58	8197.93	0.772917
818	NW_005081548.1	8720001	8740000	75	7706.77	0.8375
819	NW_005081548.1	8740001	8760000	72	8069.02	0.791667
820	NW_005081548.1	8760001	8780000	57	9195.64	0.616146
821	NW_005081548.1	8780001	8800000	55	9721.63	0.530729
822	NW_005081548.1	8800001	8820000	64	8843.37	0.675
823	NW_005081548.1	8820001	8840000	57	8528.57	0.722396
824	NW_005081548.1	8840001	8860000	67	8939.92	0.660417
825	NW_005081548.1	8860001	8880000	77	9371.87	0.585417
826	NW_005081548.1	8880001	8900000	53	10053.3	0.481771
827	NW_005081548.1	8900001	8920000	59	11343.1	0.307292
828	NW_005081548.1	8920001	8940000	51	11612.4	0.278125
829	NW_005081548.1	8940001	8960000	69	10928.9	0.358854
830	NW_005081548.1	8960001	8980000	68	10108.8	0.470833
831	NW_005081548.1	8980001	9000000	71	9807.74	0.514062
832	NW_005081548.1	9000001	9020000	69	9836.74	0.509375
833	NW_005081548.1	9020001	9040000	64	9324.24	0.598437
834	NW_005081548.1	9040001	9060000	78	9591.76	0.552083
835	NW_005081548.1	9060001	9080000	61	9332.01	0.596354
836	NW_005081548.1	9080001	9100000	51	10413	0.423438
837	NW_005081548.1	9100001	9120000	73	9774.46	0.517188
838	NW_005081548.1	9120001	9140000	68	9736.17	0.527604
839	NW_005081548.1	9140001	9160000	66	10075.9	0.478125
840	NW_005081548.1	9160001	9180000	63	9540.13	0.560417
841	NW_005081548.1	9180001	9200000	47	9068.81	0.985447
842	NW_005081548.1	9200001	9220000	49	10879.9	0.914761
843	NW_005081548.1	9220001	9240000	61	9046.71	0.641146
844	NW_005081548.1	9240001	9260000	51	9760.31	0.521875
845	NW_005081548.1	9260001	9280000	74	8522.15	0.723958
846	NW_005081548.1	9280001	9300000	66	7480.07	0.857812
847	NW_005081548.1	9300001	9320000	52	10088.6	0.474479
848	NW_005081548.1	9320001	9340000	49	9008.2	0.986486
849	NW_005081548.1	9340001	9360000	61	7794.35	0.828646
850	NW_005081548.1	9360001	9380000	63	8521.97	0.724479
851	NW_005081548.1	9380001	9400000	56	9034.17	0.645833
852	NW_005081548.1	9400001	9420000	56	8849.24	0.672917
853	NW_005081548.1	9420001	9440000	62	8447.5	0.733854
854	NW_005081548.1	9440001	9460000	39	10892.9	0.913202
855	NW_005081548.1	9460001	9480000	38	9014.12	0.985967
856	NW_005081548.1	9480001	9500000	56	9158.82	0.623958
857	NW_005081548.1	9500001	9520000	61	10696.5	0.385937
858	NW_005081548.1	9520001	9540000	44	11188.1	0.893971
859	NW_005081548.1	9540001	9560000	62	8660.89	0.697396
860	NW_005081548.1	9560001	9580000	49	10812.5	0.919958
861	NW_005081548.1	9580001	9600000	57	9215.63	0.614062
862	NW_005081548.1	9600001	9620000	53	9169.22	0.620313
863	NW_005081548.1	9620001	9640000	63	8795.76	0.682292
864	NW_005081548.1	9640001	9660000	60	8692.92	0.693229
865	NW_005081548.1	9660001	9680000	66	7824.64	0.823958
866	NW_005081548.1	9680001	9700000	61	11203.7	0.325
867	NW_005081548.1	9700001	9720000	50	9633.4	0.54375
868	NW_005081548.1	9720001	9740000	61	8449.14	0.732812
869	NW_005081548.1	9740001	9760000	53	11234.4	0.321875
870	NW_005081548.1	9760001	9780000	33	15046.8	0.546778
871	NW_005081548.1	9780001	9800000	49	13429.1	0.703222
872	NW_005081548.1	9800001	9820000	55	11728.4	0.268229
873	NW_005081548.1	9820001	9840000	36	10615.2	0.931393
874	NW_005081548.1	9840001	9860000	48	11175.9	0.89501
875	NW_005081548.1	9860001	9880000	43	13319.8	0.715696
876	NW_005081548.1	9880001	9900000	52	10206.7	0.452604
877	NW_005081548.1	9900001	9920000	49	10997	0.908004
878	NW_005081548.1	9920001	9940000	65	11492.9	0.291146
879	NW_005081548.1	9940001	9960000	50	11748.5	0.266146
880	NW_005081548.1	9960001	9980000	74	7169.77	0.889062
881	NW_005081548.1	9980001	10000000	53	11281.2	0.315104
882	NW_005081548.1	10000001	10020000	73	10986.7	0.350521
883	NW_005081548.1	10020001	10040000	53	10137.5	0.461198
884	NW_005081548.1	10040001	10060000	80	6822.27	0.924479
885	NW_005081548.1	10060001	10080000	51	10561.6	0.406771
886	NW_005081548.1	10080001	10100000	74	7847.17	0.822396
887	NW_005081548.1	10100001	10120000	66	7947.66	0.808333
888	NW_005081548.1	10120001	10140000	70	9270.99	0.604688
889	NW_005081548.1	10140001	10160000	62	9334.74	0.595833
890	NW_005081548.1	10160001	10180000	62	10749.9	0.381771
891	NW_005081548.1	10180001	10200000	58	10315.4	0.4375
892	NW_005081548.1	10200001	10220000	63	10973.1	0.353125
893	NW_005081548.1	10220001	10240000	66	8496.13	0.727604
894	NW_005081548.1	10240001	10260000	67	9107.26	0.63125
895	NW_005081548.1	10260001	10280000	60	8364.37	0.745313
896	NW_005081548.1	10280001	10300000	48	10409.5	0.946466
897	NW_005081548.1	10300001	10320000	80	8852.05	0.671875
898	NW_005081548.1	10320001	10340000	78	6635.91	0.940625
899	NW_005081548.1	10340001	10360000	72	8733.91	0.688021
900	NW_005081548.1	10360001	10380000	54	10876.9	0.365104
901	NW_005081548.1	10380001	10400000	52	11243	0.320833
902	NW_005081548.1	10400001	10420000	64	10772	0.379167
903	NW_005081548.1	10420001	10440000	50	11432.2	0.297396
904	NW_005081548.1	10440001	10460000	70	9399.55	0.580729
905	NW_005081548.1	10460001	10480000	78	8449.74	0.732292
906	NW_005081548.1	10480001	10500000	54	10088.1	0.475521
907	NW_005081548.1	10500001	10520000	41	11104.7	0.901767
908	NW_005081548.1	10520001	10540000	68	11248.6	0.319792
909	NW_005081548.1	10540001	10560000	60	8166.73	0.778125
910	NW_005081548.1	10560001	10580000	67	9563.22	0.55625
911	NW_005081548.1	10580001	10600000	70	8829.45	0.677083
912	NW_005081548.1	10600001	10620000	71	6991.51	0.910937
913	NW_005081548.1	10620001	10640000	79	7087.42	0.9
914	NW_005081548.1	10640001	10660000	61	10100.6	0.472396
915	NW_005081548.1	10660001	10680000	58	10886	0.364323
916	NW_005081548.1	10680001	10700000	47	11712.2	0.858108
917	NW_005081548.1	10700001	10720000	36	14417.1	0.60395
918	NW_005081548.1	10720001	10740000	64	8480.16	0.729167
919	NW_005081548.1	10740001	10760000	77	6748.51	0.932292
920	NW_005081548.1	10760001	10780000	54	9269.89	0.605208
921	NW_005081548.1	10780001	10800000	49	9464.68	0.97921
922	NW_005081548.1	10800001	10820000	56	9884.77	0.503125
923	NW_005081548.1	10820001	10840000	58	12213.4	0.220833
924	NW_005081548.1	10840001	10860000	29	12746.7	0.768191
925	NW_005081548.1	10860001	10880000	49	10774.8	0.922037
926	NW_005081548.1	10880001	10900000	49	9482.1	0.97869
927	NW_005081548.1	10900001	10920000	64	8957.26	0.657813
928	NW_005081548.1	10920001	10940000	62	7494.27	0.856771
929	NW_005081548.1	10940001	10960000	55	11144.5	0.329167
930	NW_005081548.1	10960001	10980000	51	8524.15	0.722917
931	NW_005081548.1	10980001	11000000	52	9533.45	0.5625
932	NW_005081548.1	11000001	11020000	63	11092.7	0.336458
933	NW_005081548.1	11020001	11040000	45	12684.5	0.775988
934	NW_005081548.1	11040001	11060000	44	12268.4	0.81237
935	NW_005081548.1	11060001	11080000	49	11167.5	0.89657
936	NW_005081548.1	11080001	11100000	54	10538	0.409375
937	NW_005081548.1	11100001	11120000	44	14128	0.634615
938	NW_005081548.1	11120001	11140000	41	12317.3	0.808212
939	NW_005081548.1	11140001	11160000	46	13586.5	0.68711
940	NW_005081548.1	11160001	11180000	37	14065.4	0.642412
941	NW_005081548.1	11180001	11200000	64	9235.2	0.610417
942	NW_005081548.1	11200001	11220000	44	13102.3	0.732328
943	NW_005081548.1	11220001	11240000	39	11933.2	0.839917
944	NW_005081548.1	11240001	11260000	41	12822.8	0.757277
945	NW_005081548.1	11260001	11280000	35	12733.9	0.769751
946	NW_005081548.1	11280001	11300000	47	10245	0.953222
947	NW_005081548.1	11300001	11320000	47	10102.4	0.95842
948	NW_005081548.1	11320001	11340000	47	11290	0.888254
949	NW_005081548.1	11340001	11360000	50	13086.5	0.151042
950	NW_005081548.1	11360001	11380000	39	15133.3	0.54158
951	NW_005081548.1	11380001	11400000	37	16227.7	0.4579
952	NW_005081548.1	11400001	11420000	45	14528.6	0.589397
953	NW_005081548.1	11420001	11440000	54	8977.99	0.655208
954	NW_005081548.1	11440001	11460000	47	11747.1	0.852911
955	NW_005081548.1	11460001	11480000	39	11619.4	0.865385
956	NW_005081548.1	11480001	11500000	49	10835.4	0.91684
957	NW_005081548.1	11500001	11520000	55	9879.57	0.504167
958	NW_005081548.1	11520001	11540000	53	9105.16	0.631771
959	NW_005081548.1	11540001	11560000	68	7709.39	0.836979
960	NW_005081548.1	11560001	11580000	59	10014.2	0.486979
961	NW_005081548.1	11580001	11600000	58	8674.41	0.695833
962	NW_005081548.1	11600001	11620000	62	8092.44	0.788542
963	NW_005081548.1	11620001	11640000	76	7502.58	0.85625
964	NW_005081548.1	11640001	11660000	48	10036.9	0.960499
965	NW_005081548.1	11660001	11680000	74	6989.01	0.911458
966	NW_005081548.1	11680001	11700000	52	8164.17	0.778646
967	NW_005081548.1	11700001	11720000	50	9871.59	0.505208
968	NW_005081548.1	11720001	11740000	74	6727.34	0.934375
969	NW_005081548.1	11740001	11760000	58	8142.17	0.782813
970	NW_005081548.1	11760001	11780000	64	9985.66	0.490625
971	NW_005081548.1	11780001	11800000	64	9583.37	0.552604
972	NW_005081548.1	11800001	11820000	83	6336.23	0.967187
973	NW_005081548.1	11820001	11840000	50	10027.2	0.486458
974	NW_005081548.1	11840001	11860000	53	9100.14	0.633333
975	NW_005081548.1	11860001	11880000	59	7933.04	0.808854
976	NW_005081548.1	11880001	11900000	55	7957.6	0.80625
977	NW_005081548.1	11900001	11920000	60	6067.76	0.973958
978	NW_005081620.1	1	20000	45	6804.23	0.995322
979	NW_005081620.1	20001	40000	67	8722.6	0.690104
980	NW_005081620.1	40001	60000	81	8265.82	0.761979
981	NW_005081620.1	60001	80000	65	8857.1	0.670312
982	NW_005081620.1	80001	100000	61	9898.22	0.5
983	NW_005081620.1	100001	120000	41	12969	0.746881
984	NW_005081620.1	120001	140000	44	11409.3	0.879938
985	NW_005081620.1	140001	160000	38	12218.4	0.819647
986	NW_005081620.1	160001	180000	57	14382.3	0.0848958
987	NW_005081620.1	180001	200000	34	14750.3	0.568607
988	NW_005081620.1	200001	220000	60	12549.2	0.190104
989	NW_005081620.1	220001	240000	36	14413.1	0.60499
990	NW_005081620.1	240001	260000	48	12437.9	0.799376
991	NW_005081620.1	260001	280000	41	16941.1	0.410603
992	NW_005081620.1	280001	300000	30	18252.2	0.341476
993	NW_005081620.1	300001	320000	33	16591.5	0.431913
994	NW_005081620.1	320001	340000	47	13616.3	0.682432
995	NW_005081620.1	340001	360000	44	13490.1	0.696985
996	NW_005081620.1	360001	380000	42	14101.6	0.637214
997	NW_005081620.1	380001	400000	42	13760.8	0.664501
998	NW_005081620.1	400001	420000	32	14550.8	0.586279
999	NW_005081620.1	420001	440000	43	13257.3	0.719854
1000	NW_005081620.1	440001	460000	41	14746.6	0.569127
1001	NW_005081620.1	460001	480000	42	12196.8	0.821726
1002	NW_005081620.1	480001	500000	50	10787.3	0.376823
1003	NW_005081620.1	500001	520000	52	11107.6	0.335417
1004	NW_005081620.1	520001	540000	37	12190.8	0.823285
1005	NW_005081620.1	540001	560000	36	19749.2	0.278067
1006	NW_005081620.1	560001	580000	37	18232.5	0.342516
1007	NW_005081620.1	580001	600000	33	14373.5	0.610187
1008	NW_005081620.1	600001	620000	33	20761.4	0.246881
1009	NW_005081620.1	620001	640000	31	21114.4	0.230769
1010	NW_005081620.1	640001	660000	26	22036.5	0.204262
1011	NW_005081620.1	660001	680000	31	22275.9	0.198025
1012	NW_005081620.1	680001	700000	19	21753.8	0.212058
1013	NW_005081620.1	700001	720000	16	20315.9	0.262474
1014	NW_005081620.1	720001	740000	40	14870.9	0.560811
1015	NW_005081620.1	740001	760000	54	12004.3	0.239583
1016	NW_005081620.1	760001	780000	48	18522.5	0.330042
1017	NW_005081620.1	780001	800000	26	21136.9	0.22921
1018	NW_005081620.1	800001	820000	43	20061.8	0.267672
1019	NW_005081620.1	820001	840000	43	13646.9	0.678794
1020	NW_005081620.1	840001	860000	41	14005.7	0.648129
1021	NW_005081620.1	860001	880000	49	12983.1	0.745322
1022	NW_005081620.1	880001	900000	47	10435.2	0.943867
1023	NW_005081620.1	900001	920000	68	8404.48	0.740104
1024	NW_005081620.1	920001	940000	61	7224.81	0.884375
1025	NW_005081620.1	940001	960000	74	8100.7	0.786979
1026	NW_005081620.1	960001	980000	53	8340.33	0.748437
1027	NW_005081620.1	980001	1000000	60	8596.22	0.711979
1028	NW_005081620.1	1000001	1020000	64	9454.53	0.572396
1029	NW_005081620.1	1020001	1040000	59	8993.36	0.651563
1030	NW_005081620.1	1040001	1060000	58	9649.37	0.541667
1031	NW_005081620.1	1060001	1080000	62	10658.5	0.390104
1032	NW_005081620.1	1080001	1100000	44	11494.6	0.872401
1033	NW_005081620.1	1100001	1120000	47	17106.1	0.399688
1034	NW_005081620.1	1120001	1140000	19	19532.3	0.286902
1035	NW_005081620.1	1140001	1160000	34	16869.1	0.4158
1036	NW_005081620.1	1160001	1180000	29	14377.3	0.609667
1037	NW_005081620.1	1180001	1200000	45	9244.56	0.981289
1038	NW_005081620.1	1200001	1220000	49	9945.21	0.968035
1039	NW_005081620.1	1220001	1240000	37	10433.9	0.944387
1040	NW_005081620.1	1240001	1260000	54	10272.7	0.442188
1041	NW_005081620.1	1260001	1280000	53	8612.4	0.707812
1042	NW_005081620.1	1280001	1300000	74	9396.95	0.58125
1043	NW_005081620.1	1300001	1320000	45	13020.6	0.743763
1044	NW_005081620.1	1320001	1340000	51	10662.5	0.389062
1045	NW_005081620.1	1340001	1360000	58	10100.3	0.472917
1046	NW_005081620.1	1360001	1380000	48	10538.2	0.93711
1047	NW_005081620.1	1380001	1400000	79	9252	0.607812
1048	NW_005081620.1	1400001	1420000	81	7822.76	0.824479
1049	NW_005081620.1	1420001	1440000	69	9949.19	0.493229
1050	NW_005081620.1	1440001	1460000	77	9355.18	0.589583
1051	NW_005081620.1	1460001	1480000	53	10114.1	0.469271
1052	NW_005081620.1	1480001	1500000	54	9581.26	0.553646
1053	NW_005081620.1	1500001	1520000	66	9225.23	0.6125
1054	NW_005081620.1	1520001	1540000	81	8219.07	0.76875
1055	NW_005081620.1	1540001	1560000	62	9702.28	0.532292
1056	NW_005081620.1	1560001	1580000	73	9647.7	0.542708
1057	NW_005081620.1	1580001	1600000	46	13897.4	0.656445
1058	NW_005081620.1	1600001	1620000	50	10692.3	0.386458
1059	NW_005081620.1	1620001	1640000	79	9162.78	0.622396
1060	NW_005081620.1	1640001	1660000	78	10475.5	0.416146
1061	NW_005081620.1	1660001	1680000	55	15103.7	0.0614583
1062	NW_005081620.1	1680001	1700000	71	13384.7	0.13125
1063	NW_005081620.1	1700001	1720000	75	11417	0.297917
1064	NW_005081620.1	1720001	1740000	66	12434.6	0.2
1065	NW_005081620.1	1740001	1760000	60	12026.1	0.2375
1066	NW_005081620.1	1760001	1780000	43	12585.2	0.784823
1067	NW_005081620.1	1780001	1800000	57	12689.7	0.179688
1068	NW_005081620.1	1800001	1820000	52	13426.8	0.128646
1069	NW_005081620.1	1820001	1840000	55	15445.9	0.0494792
1070	NW_005081620.1	1840001	1860000	43	16141.4	0.467256
1071	NW_005081620.1	1860001	1880000	57	13778.9	0.113021
1072	NW_005081620.1	1880001	1900000	52	14109.9	0.0942708
1073	NW_005081620.1	1900001	1920000	47	14637.6	0.579522
1074	NW_005081620.1	1920001	1940000	32	18629	0.327963
1075	NW_005081620.1	1940001	1960000	36	21251.6	0.224532
1076	NW_005081620.1	1960001	1980000	55	13981.6	0.102083
1077	NW_005081620.1	1980001	2000000	64	10065.6	0.479687
1078	NW_005081620.1	2000001	2020000	39	13106.5	0.731289
1079	NW_005081620.1	2020001	2040000	51	14245.5	0.0901042
1080	NW_005081620.1	2040001	2060000	42	13204.8	0.722973
1081	NW_005081620.1	2060001	2080000	50	13996.4	0.101562
1082	NW_005081620.1	2080001	2100000	45	16395	0.442308
1083	NW_005081620.1	2100001	2120000	35	16314.9	0.449584
1084	NW_005081620.1	2120001	2140000	31	20901.3	0.239085
1085	NW_005081620.1	2140001	2160000	33	22536.3	0.192827
1086	NW_005081620.1	2160001	2180000	28	20622.7	0.252599
1087	NW_005081620.1	2180001	2200000	39	13880.6	0.657484
1088	NW_005081620.1	2200001	2220000	44	14306.7	0.615385
1089	NW_005081620.1	2220001	2240000	38	16172.5	0.464137
1090	NW_005081620.1	2240001	2260000	37	15774.6	0.488565
1091	NW_005081620.1	2260001	2280000	43	13622.1	0.681913
1092	NW_005081620.1	2280001	2300000	53	14194.3	0.0921875
1093	NW_005081620.1	2300001	2320000	59	14590.1	0.0734375
1094	NW_005081620.1	2320001	2340000	46	14532.1	0.587838
1095	NW_005081620.1	2340001	2360000	52	14620.8	0.0723958
1096	NW_005081620.1	2360001	2380000	54	14444.6	0.08125
1097	NW_005081620.1	2380001	2400000	47	14587.9	0.58316
1098	NW_005081620.1	2400001	2420000	49	15288.4	0.532225
1099	NW_005081620.1	2420001	2440000	52	17333.6	0.0270833
1100	NW_005081620.1	2440001	2460000	35	19244.3	0.301975
1101	NW_005081620.1	2460001	2480000	56	15685.4	0.0427083
1102	NW_005081620.1	2480001	2500000	57	13716.2	0.117188
1103	NW_005081620.1	2500001	2520000	36	17794.8	0.362266
1104	NW_005081620.1	2520001	2540000	44	15233.4	0.535863
1105	NW_005081620.1	2540001	2560000	55	12147.4	0.227604
1106	NW_005081620.1	2560001	2580000	51	14551	0.0765625
1107	NW_005081620.1	2580001	2600000	63	14024.8	0.0994792
1108	NW_005081620.1	2600001	2620000	46	13461.7	0.699064
1109	NW_005081620.1	2620001	2640000	67	14477	0.0796875
1110	NW_005081620.1	2640001	2660000	47	20409.3	0.259356
1111	NW_005081620.1	2660001	2680000	49	20933.9	0.237006
1112	NW_005081620.1	2680001	2700000	70	17329	0.0276042
1113	NW_005081620.1	2700001	2720000	63	15544.5	0.0473958
1114	NW_005081620.1	2720001	2740000	84	12411.4	0.202604
1115	NW_005081620.1	2740001	2760000	70	10769.5	0.379688
1116	NW_005081620.1	2760001	2780000	58	17543.4	0.0255208
1117	NW_005081620.1	2780001	2800000	41	19854.1	0.274428
1118	NW_005081620.1	2800001	2820000	53	17104.9	0.0286458
1119	NW_005081620.1	2820001	2840000	68	11882.5	0.253646
1120	NW_005081620.1	2840001	2860000	46	13915.8	0.655405
1121	NW_005081620.1	2860001	2880000	45	13337.2	0.712578
1122	NW_005081620.1	2880001	2900000	56	13390	0.130208
1123	NW_005081620.1	2900001	2920000	50	13969.6	0.103125
1124	NW_005081620.1	2920001	2940000	47	17177.6	0.39657
1125	NW_005081620.1	2940001	2960000	50	15886.9	0.040625
1126	NW_005081620.1	2960001	2980000	55	16516.2	0.0328125
1127	NW_005081620.1	2980001	3000000	41	18985.3	0.31289
1128	NW_005081620.1	3000001	3020000	39	20413.1	0.258836
1129	NW_005081620.1	3020001	3040000	51	19120.1	0.0125
1130	NW_005081620.1	3040001	3060000	53	18929.7	0.0145833
1131	NW_005081620.1	3060001	3080000	75	17181	0.028125
1132	NW_005081620.1	3080001	3100000	42	16875.5	0.415281
1133	NW_005081620.1	3100001	3120000	55	16262.4	0.0369792
1134	NW_005081620.1	3120001	3140000	45	14486.1	0.595114
1135	NW_005081620.1	3140001	3160000	25	20835.8	0.242723
1136	NW_005081620.1	3160001	3180000	46	18744.1	0.322245
1137	NW_005081620.1	3180001	3200000	11	5504.85	0.997921
1138	NW_005081699.1	1160001	1180000	3	12002.9	0.83368
1139	NW_005081699.1	1140001	1160000	46	13250.1	0.720894
1140	NW_005081699.1	1120001	1140000	49	14510.3	0.592516
1141	NW_005081699.1	1100001	1120000	39	12023.9	0.831601
1142	NW_005081699.1	1080001	1100000	69	11082	0.338542
1143	NW_005081699.1	1060001	1080000	50	11783.4	0.261979
1144	NW_005081699.1	1040001	1060000	56	12290.1	0.215104
1145	NW_005081699.1	1020001	1040000	48	11727.6	0.85499
1146	NW_005081699.1	1000001	1020000	45	12304.4	0.808732
1147	NW_005081699.1	980001	1000000	40	15489.1	0.514553
1148	NW_005081699.1	960001	980000	46	15419.2	0.522349
1149	NW_005081699.1	940001	960000	58	14042	0.0984375
1150	NW_005081699.1	920001	940000	45	13761.6	0.663721
1151	NW_005081699.1	900001	920000	40	13482.8	0.697505
1152	NW_005081699.1	880001	900000	54	12451.1	0.196875
1153	NW_005081699.1	860001	880000	47	12816.4	0.758316
1154	NW_005081699.1	840001	860000	60	10728.6	0.383333
1155	NW_005081699.1	820001	840000	60	11993.7	0.242708
1156	NW_005081699.1	800001	820000	63	8579.66	0.715104
1157	NW_005081699.1	780001	800000	79	7960.92	0.805729
1158	NW_005081699.1	760001	780000	90	6942.08	0.916146
1159	NW_005081699.1	740001	760000	93	7033.69	0.903646
1160	NW_005081699.1	720001	740000	87	8242.68	0.766146
1161	NW_005081699.1	700001	720000	64	9662.15	0.538542
1162	NW_005081699.1	680001	700000	99	8242.27	0.766667
1163	NW_005081699.1	660001	680000	90	7794.61	0.828125
1164	NW_005081699.1	640001	660000	89	15695.1	0.0421875
1165	NW_005081699.1	620001	640000	54	16653.7	0.03125
1166	NW_005081699.1	600001	620000	81	10100.9	0.471875
1167	NW_005081699.1	580001	600000	70	9737.77	0.527083
1168	NW_005081699.1	560001	580000	75	9128.61	0.628125
1169	NW_005081699.1	540001	560000	81	8640.05	0.701042
1170	NW_005081699.1	520001	540000	78	9551.31	0.558333
1171	NW_005081699.1	500001	520000	89	9860.35	0.50625
1172	NW_005081699.1	480001	500000	77	9562.75	0.556771
1173	NW_005081699.1	460001	480000	64	11263.9	0.317708
1174	NW_005081699.1	440001	460000	73	9816.05	0.513021
1175	NW_005081699.1	420001	440000	83	9234.98	0.610938
1176	NW_005081699.1	400001	420000	79	9324.74	0.597917
1177	NW_005081699.1	380001	400000	59	11143.8	0.329948
1178	NW_005081699.1	360001	380000	77	10581.9	0.401042
1179	NW_005081699.1	340001	360000	95	9964.08	0.491146
1180	NW_005081699.1	320001	340000	91	8521.91	0.725
1181	NW_005081699.1	300001	320000	78	9077.92	0.635417
1182	NW_005081699.1	280001	300000	65	10376	0.429167
1183	NW_005081699.1	260001	280000	61	9313.75	0.6
1184	NW_005081699.1	240001	260000	80	8759.4	0.685937
1185	NW_005081699.1	220001	240000	84	9378.32	0.583333
1186	NW_005081699.1	200001	220000	72	9716.03	0.53125
1187	NW_005081699.1	180001	200000	84	7855.72	0.820833
1188	NW_005081699.1	160001	180000	82	8376.36	0.74375
1189	NW_005081699.1	140001	160000	109	7250.17	0.0726765
1190	NW_005081699.1	120001	140000	63	7442.2	0.861458
1191	NW_005081699.1	100001	120000	67	10550.2	0.407813
1192	NW_005081699.1	80001	100000	75	11865	0.254688
1193	NW_005081699.1	60001	80000	59	12709	0.177083
1194	NW_005081699.1	40001	60000	58	10499.5	0.4125
1195	NW_005081699.1	20001	40000	79	7861.1	0.820312
1196	NW_005081699.1	1	20000	72	7348.07	0.871354
1197	NW_005081574.1	5680001	5700000	29	7901.06	0.993243
1198	NW_005081574.1	5660001	5680000	52	11407.2	0.298438
1199	NW_005081574.1	5640001	5660000	103	6313.33	0.142558
1200	NW_005081574.1	5620001	5640000	98	6451.04	0.959896
1201	NW_005081574.1	5600001	5620000	61	8729.02	0.688542
1202	NW_005081574.1	5580001	5600000	75	8596.47	0.711458
1203	NW_005081574.1	5560001	5580000	66	8665.56	0.696875
1204	NW_005081574.1	5540001	5560000	55	13943	0.105208
1205	NW_005081574.1	5520001	5540000	90	9693.49	0.533854
1206	NW_005081574.1	5500001	5520000	74	7355.8	0.869792
1207	NW_005081574.1	5480001	5500000	76	7866.85	0.819271
1208	NW_005081574.1	5460001	5480000	49	10294.1	0.951143
1209	NW_005081574.1	5440001	5460000	65	10027.8	0.485938
1210	NW_005081574.1	5420001	5440000	62	7966.79	0.804688
1211	NW_005081574.1	5400001	5420000	86	7736.53	0.835417
1212	NW_005081574.1	5380001	5400000	69	6611.96	0.94375
1213	NW_005081574.1	5360001	5380000	80	6674.88	0.938021
1214	NW_005081574.1	5340001	5360000	78	8509.04	0.726562
1215	NW_005081574.1	5320001	5340000	72	7955.11	0.807292
1216	NW_005081574.1	5300001	5320000	76	9045.43	0.641667
1217	NW_005081574.1	5280001	5300000	90	7642.29	0.842708
1218	NW_005081574.1	5260001	5280000	52	10006.6	0.488021
1219	NW_005081574.1	5240001	5260000	72	9773.4	0.51875
1220	NW_005081574.1	5220001	5240000	87	7096.94	0.898958
1221	NW_005081574.1	5200001	5220000	60	9673.63	0.536979
1222	NW_005081574.1	5180001	5200000	94	6512.11	0.952604
1223	NW_005081574.1	5160001	5180000	110	6143.98	0.162124
1224	NW_005081574.1	5140001	5160000	96	5632.76	0.986979
1225	NW_005081574.1	5120001	5140000	60	8796.08	0.68125
1226	NW_005081574.1	5100001	5120000	83	7640.89	0.843229
1227	NW_005081574.1	5080001	5100000	84	7000.98	0.908854
1228	NW_005081574.1	5060001	5080000	81	7165.28	0.890104
1229	NW_005081574.1	5040001	5060000	96	8004.15	0.796875
1230	NW_005081574.1	5020001	5040000	84	5751.16	0.984896
1231	NW_005081574.1	5000001	5020000	103	5769.5	0.215933
1232	NW_005081574.1	4980001	5000000	67	7427.86	0.863021
1233	NW_005081574.1	4960001	4980000	81	7638.1	0.844271
1234	NW_005081574.1	4940001	4960000	70	8512.68	0.725521
1235	NW_005081574.1	4920001	4940000	69	7371.32	0.867708
1236	NW_005081574.1	4900001	4920000	64	10082.9	0.476042
1237	NW_005081574.1	4880001	4900000	91	6847.96	0.921875
1238	NW_005081574.1	4860001	4880000	56	8274.45	0.759896
1239	NW_005081574.1	4840001	4860000	72	8854.83	0.670833
1240	NW_005081574.1	4820001	4840000	96	9312.32	0.600521
1241	NW_005081574.1	4800001	4820000	106	5915.69	0.196366
1242	NW_005081574.1	4780001	4800000	92	7247.7	0.882812
1243	NW_005081574.1	4760001	4780000	131	5821.85	0.207547
1244	NW_005081574.1	4740001	4760000	97	7774.15	0.833333
1245	NW_005081574.1	4720001	4740000	70	9877.57	0.504687
1246	NW_005081574.1	4700001	4720000	91	8122.66	0.784896
1247	NW_005081574.1	4680001	4700000	93	9311.95	0.601042
1248	NW_005081574.1	4660001	4680000	80	10119.7	0.466146
1249	NW_005081574.1	4640001	4660000	95	9516.31	0.564583
1250	NW_005081574.1	4620001	4640000	90	10983.8	0.351042
1251	NW_005081574.1	4600001	4620000	58	13211.4	0.143229
1252	NW_005081574.1	4580001	4600000	85	11446.5	0.295312
1253	NW_005081574.1	4560001	4580000	97	6948.01	0.915625
1254	NW_005081574.1	4540001	4560000	69	7867.81	0.81875
1255	NW_005081574.1	4520001	4540000	91	7270.51	0.879687
1256	NW_005081574.1	4500001	4520000	79	10076.1	0.477604
1257	NW_005081574.1	4480001	4500000	93	7977.58	0.801562
1258	NW_005081574.1	4460001	4480000	99	8036.72	0.794271
1259	NW_005081574.1	4440001	4460000	88	8564.42	0.718229
1260	NW_005081574.1	4420001	4440000	86	9335.77	0.595313
1261	NW_005081574.1	4400001	4420000	81	9481.05	0.570833
1262	NW_005081574.1	4380001	4400000	109	9086.95	0.022362
1263	NW_005081574.1	4360001	4380000	82	8657.21	0.698438
1264	NW_005081574.1	4340001	4360000	70	8262.27	0.7625
1265	NW_005081574.1	4320001	4340000	66	9699.37	0.532813
1266	NW_005081574.1	4300001	4320000	81	9161.8	0.622917
1267	NW_005081574.1	4280001	4300000	88	6505.85	0.953646
1268	NW_005081574.1	4260001	4280000	69	8616.95	0.707292
1269	NW_005081574.1	4240001	4260000	76	9238.99	0.608854
1270	NW_005081574.1	4220001	4240000	57	8960.69	0.657292
1271	NW_005081574.1	4200001	4220000	87	7923.93	0.810937
1272	NW_005081574.1	4180001	4200000	75	6550.81	0.947917
1273	NW_005081574.1	4160001	4180000	70	7098.34	0.898438
1274	NW_005081574.1	4140001	4160000	89	6963.45	0.913021
1275	NW_005081574.1	4120001	4140000	76	7163.07	0.890625
1276	NW_005081574.1	4100001	4120000	66	7167.51	0.889583
1277	NW_005081574.1	4080001	4100000	53	8147.84	0.782292
1278	NW_005081574.1	4060001	4080000	49	8681.44	0.990125
1279	NW_005081574.1	4040001	4060000	57	8289.5	0.75625
1280	NW_005081574.1	4020001	4040000	54	10345.5	0.433333
1281	NW_005081574.1	4000001	4020000	77	8084.7	0.789062
1282	NW_005081574.1	3980001	4000000	84	8159.99	0.779167
1283	NW_005081574.1	3960001	3980000	76	9346.26	0.593229
1284	NW_005081574.1	3940001	3960000	67	8605.16	0.708854
1285	NW_005081574.1	3920001	3940000	83	9024.88	0.646354
1286	NW_005081574.1	3900001	3920000	60	10591.9	0.4
1287	NW_005081574.1	3880001	3900000	50	12642.7	0.182812
1288	NW_005081574.1	3860001	3880000	80	12135	0.229687
1289	NW_005081574.1	3840001	3860000	92	7883.99	0.818229
1290	NW_005081574.1	3820001	3840000	76	8961.08	0.656771
1291	NW_005081574.1	3800001	3820000	51	8908.81	0.6625
1292	NW_005081574.1	3780001	3800000	47	9530.19	0.977651
1293	NW_005081574.1	3760001	3780000	41	12130.6	0.826403
1294	NW_005081574.1	3740001	3760000	46	11370.9	0.882017
1295	NW_005081574.1	3720001	3740000	61	9572.34	0.555208
1296	NW_005081574.1	3700001	3720000	68	9225.91	0.611979
1297	NW_005081574.1	3680001	3700000	67	9123.56	0.629167
1298	NW_005081574.1	3660001	3680000	80	8158.82	0.780208
1299	NW_005081574.1	3640001	3660000	65	10259.5	0.444792
1300	NW_005081574.1	3620001	3640000	66	9112.01	0.630729
1301	NW_005081574.1	3600001	3620000	65	11776.5	0.263542
1302	NW_005081574.1	3580001	3600000	53	12315.6	0.213021
1303	NW_005081574.1	3560001	3580000	52	12219.7	0.219792
1304	NW_005081574.1	3540001	3560000	64	9752.88	0.522917
1305	NW_005081574.1	3520001	3540000	54	10603.9	0.398438
1306	NW_005081574.1	3500001	3520000	60	10943.9	0.356771
1307	NW_005081574.1	3480001	3500000	51	12587.4	0.188021
1308	NW_005081574.1	3460001	3480000	62	9769.19	0.519271
1309	NW_005081574.1	3440001	3460000	54	11545.1	0.286458
1310	NW_005081574.1	3420001	3440000	91	9066.24	0.639062
1311	NW_005081574.1	3400001	3420000	66	9173.63	0.61875
1312	NW_005081574.1	3380001	3400000	64	8280.17	0.758333
1313	NW_005081574.1	3360001	3380000	61	10388.1	0.426563
1314	NW_005081574.1	3340001	3360000	83	9373.6	0.584375
1315	NW_005081574.1	3320001	3340000	58	11037.1	0.343229
1316	NW_005081574.1	3300001	3320000	87	11030.2	0.344271
1317	NW_005081574.1	3280001	3300000	73	7201.78	0.886458
1318	NW_005081574.1	3260001	3280000	82	6955.88	0.915104
1319	NW_005081574.1	3240001	3260000	79	6701.77	0.935417
1320	NW_005081574.1	3220001	3240000	76	8245	0.765104
1321	NW_005081574.1	3200001	3220000	78	7321.61	0.874479
1322	NW_005081574.1	3180001	3200000	76	9238.7	0.609375
1323	NW_005081574.1	3160001	3180000	76	8130.72	0.783854
1324	NW_005081574.1	3140001	3160000	76	7907.33	0.813021
1325	NW_005081574.1	3120001	3140000	78	6338.64	0.966667
1326	NW_005081574.1	3100001	3120000	98	6581.58	0.946354
1327	NW_005081574.1	3080001	3100000	84	7300.34	0.876563
1328	NW_005081574.1	3060001	3080000	81	8848.44	0.673958
1329	NW_005081574.1	3040001	3060000	91	7853.51	0.821875
1330	NW_005081574.1	3020001	3040000	115	7103.44	0.0803634
1331	NW_005081574.1	3000001	3020000	74	7978.7	0.801042
1332	NW_005081574.1	2980001	3000000	64	9726.14	0.529687
1333	NW_005081574.1	2960001	2980000	72	9535.82	0.561458
1334	NW_005081574.1	2940001	2960000	76	7001.4	0.908333
1335	NW_005081574.1	2920001	2940000	54	8619.1	0.706771
1336	NW_005081574.1	2900001	2920000	113	10635.9	0.0125786
1337	NW_005081574.1	2880001	2900000	85	11264.6	0.316667
1338	NW_005081574.1	2860001	2880000	109	9818.11	0.0153739
1339	NW_005081574.1	2840001	2860000	81	7991.15	0.798958
1340	NW_005081574.1	2820001	2840000	53	11922	0.25
1341	NW_005081574.1	2800001	2820000	68	12196.3	0.222396
1342	NW_005081574.1	2780001	2800000	59	10787.3	0.376823
1343	NW_005081574.1	2760001	2780000	63	9935	0.495833
1344	NW_005081574.1	2740001	2760000	69	12591.8	0.186979
1345	NW_005081574.1	2720001	2740000	72	12748.7	0.173437
1346	NW_005081574.1	2700001	2720000	76	11490.1	0.292187
1347	NW_005081574.1	2680001	2700000	75	11995.4	0.242188
1348	NW_005081574.1	2660001	2680000	66	11250.4	0.319271
1349	NW_005081574.1	2640001	2660000	76	9835.49	0.510417
1350	NW_005081574.1	2620001	2640000	45	11995.9	0.834719
1351	NW_005081574.1	2600001	2620000	69	10766.9	0.380208
1352	NW_005081574.1	2580001	2600000	43	13496.7	0.695946
1353	NW_005081574.1	2560001	2580000	57	13507.9	0.125521
1354	NW_005081574.1	2540001	2560000	49	10034.5	0.961019
1355	NW_005081574.1	2520001	2540000	76	9747.98	0.523438
1356	NW_005081574.1	2500001	2520000	64	9651.08	0.540625
1357	NW_005081574.1	2480001	2500000	45	11911.2	0.841996
1358	NW_005081574.1	2460001	2480000	71	9350.04	0.592187
1359	NW_005081574.1	2440001	2460000	75	9944.48	0.49375
1360	NW_005081574.1	2420001	2440000	61	10795.8	0.376042
1361	NW_005081574.1	2400001	2420000	56	10119.8	0.465625
1362	NW_005081574.1	2380001	2400000	58	14789	0.0666667
1363	NW_005081574.1	2360001	2380000	61	9602.52	0.548958
1364	NW_005081574.1	2340001	2360000	69	14739.4	0.0692708
1365	NW_005081574.1	2320001	2340000	3	24489.6	0.148649
1366	NW_005081574.1	2300001	2320000	55	25373.9	0.00260417
1367	NW_005081574.1	2280001	2300000	60	10460.7	0.418229
1368	NW_005081574.1	2260001	2280000	61	10094.8	0.473438
1369	NW_005081574.1	2240001	2260000	55	9383.18	0.582292
1370	NW_005081574.1	2220001	2240000	55	8603.41	0.709896
1371	NW_005081574.1	2200001	2220000	41	12370.7	0.804574
1372	NW_005081574.1	2180001	2200000	31	13605.2	0.683992
1373	NW_005081574.1	2160001	2180000	50	10228.2	0.448958
1374	NW_005081574.1	2140001	2160000	37	13684.7	0.673597
1375	NW_005081574.1	2120001	2140000	52	9215.04	0.614583
1376	NW_005081574.1	2100001	2120000	52	10903.2	0.3625
1377	NW_005081574.1	2080001	2100000	47	10460.7	0.942308
1378	NW_005081574.1	2060001	2080000	58	9847.36	0.508333
1379	NW_005081574.1	2040001	2060000	64	8859.5	0.669792
1380	NW_005081574.1	2020001	2040000	52	9359.58	0.588542
1381	NW_005081574.1	2000001	2020000	44	9919.14	0.969335
1382	NW_005081574.1	1980001	2000000	53	10396.1	0.425521
1383	NW_005081574.1	1960001	1980000	62	8368.65	0.744792
1384	NW_005081574.1	1940001	1960000	69	10637.9	0.39375
1385	NW_005081574.1	1920001	1940000	44	9824.62	0.972973
1386	NW_005081574.1	1900001	1920000	57	9654.94	0.540104
1387	NW_005081574.1	1880001	1900000	41	12442.2	0.798337
1388	NW_005081574.1	1860001	1880000	60	9658.2	0.539062
1389	NW_005081574.1	1840001	1860000	65	11141	0.330729
1390	NW_005081574.1	1820001	1840000	61	8916.05	0.661979
1391	NW_005081574.1	1800001	1820000	53	11285.5	0.313542
1392	NW_005081574.1	1780001	1800000	49	12799.4	0.761954
1393	NW_005081574.1	1760001	1780000	45	13120.4	0.72973
1394	NW_005081574.1	1740001	1760000	35	13083.4	0.736486
1395	NW_005081574.1	1720001	1740000	46	12243.9	0.817048
1396	NW_005081574.1	1700001	1720000	48	11632.6	0.862786
1397	NW_005081574.1	1680001	1700000	51	11905.6	0.251042
1398	NW_005081574.1	1660001	1680000	43	13183.7	0.724532
1399	NW_005081574.1	1640001	1660000	37	11859.3	0.844595
1400	NW_005081574.1	1620001	1640000	62	10125.9	0.464583
1401	NW_005081574.1	1600001	1620000	52	9349.08	0.592708
1402	NW_005081574.1	1580001	1600000	65	9840.18	0.508854
1403	NW_005081574.1	1560001	1580000	43	12665.8	0.778067
1404	NW_005081574.1	1540001	1560000	38	15653.1	0.50052
1405	NW_005081574.1	1520001	1540000	33	16558.1	0.433992
1406	NW_005081574.1	1500001	1520000	43	14410.3	0.605509
1407	NW_005081574.1	1480001	1500000	40	14534.2	0.587318
1408	NW_005081574.1	1460001	1480000	35	12335.1	0.807173
1409	NW_005081574.1	1440001	1460000	48	14016.4	0.647609
1410	NW_005081574.1	1420001	1440000	51	9367.85	0.586458
1411	NW_005081574.1	1400001	1420000	46	11676	0.860187
1412	NW_005081574.1	1380001	1400000	47	11615.5	0.866944
1413	NW_005081574.1	1360001	1380000	42	12484.2	0.794179
1414	NW_005081574.1	1340001	1360000	39	13280.6	0.718295
1415	NW_005081574.1	1320001	1340000	53	13665	0.121875
1416	NW_005081574.1	1300001	1320000	30	15085.7	0.544699
1417	NW_005081574.1	1280001	1300000	55	10678.1	0.388021
1418	NW_005081574.1	1260001	1280000	38	13430.5	0.702703
1419	NW_005081574.1	1240001	1260000	32	16627.6	0.430873
1420	NW_005081574.1	1220001	1240000	36	17068.8	0.402287
1421	NW_005081574.1	1200001	1220000	35	17738.2	0.366944
1422	NW_005081574.1	1180001	1200000	27	15452.5	0.517152
1423	NW_005081574.1	1160001	1180000	47	13355.2	0.711538
1424	NW_005081574.1	1140001	1160000	46	11570.3	0.867983
1425	NW_005081574.1	1120001	1140000	39	14337.2	0.612786
1426	NW_005081574.1	1100001	1120000	47	11124.7	0.901247
1427	NW_005081574.1	1080001	1100000	45	11628	0.864865
1428	NW_005081574.1	1060001	1080000	46	13427.8	0.703742
1429	NW_005081574.1	1040001	1060000	43	14850.2	0.56237
1430	NW_005081574.1	1020001	1040000	49	12587.8	0.783784
1431	NW_005081574.1	1000001	1020000	36	14024.3	0.64605
1432	NW_005081574.1	980001	1000000	61	10841.1	0.369271
1433	NW_005081574.1	960001	980000	39	15556.3	0.508316
1434	NW_005081574.1	940001	960000	32	14381	0.608628
1435	NW_005081574.1	920001	940000	53	12898.9	0.1625
1436	NW_005081574.1	900001	920000	49	10744.8	0.923597
1437	NW_005081574.1	880001	900000	48	12132.2	0.825884
1438	NW_005081574.1	860001	880000	37	14126.3	0.635655
1439	NW_005081574.1	840001	860000	45	13768.7	0.662682
1440	NW_005081574.1	820001	840000	39	14161.6	0.631497
1441	NW_005081574.1	800001	820000	38	13664.4	0.676195
1442	NW_005081574.1	780001	800000	35	14295.6	0.615904
1443	NW_005081574.1	760001	780000	56	10649.2	0.392708
1444	NW_005081574.1	740001	760000	37	12202.3	0.821206
1445	NW_005081574.1	720001	740000	49	11548.9	0.868503
1446	NW_005081574.1	700001	720000	48	10012.4	0.963617
1447	NW_005081574.1	680001	700000	45	10820.2	0.918399
1448	NW_005081574.1	660001	680000	42	15652.1	0.50104
1449	NW_005081574.1	640001	660000	35	16484.5	0.43711
1450	NW_005081574.1	620001	640000	54	9602.38	0.549479
1451	NW_005081574.1	600001	620000	39	12140.7	0.825364
1452	NW_005081574.1	580001	600000	39	13421.9	0.705301
1453	NW_005081574.1	560001	580000	41	14272.7	0.618763
1454	NW_005081574.1	540001	560000	41	10859.2	0.9158
1455	NW_005081574.1	520001	540000	44	12475.1	0.795738
1456	NW_005081574.1	500001	520000	33	14528.9	0.588877
1457	NW_005081574.1	480001	500000	32	18346.1	0.337318
1458	NW_005081574.1	460001	480000	39	16268.8	0.454262
1459	NW_005081574.1	440001	460000	50	11217	0.323958
1460	NW_005081574.1	420001	440000	49	11207.8	0.892931
1461	NW_005081574.1	400001	420000	54	11403.4	0.298958
1462	NW_005081574.1	380001	400000	62	10013.7	0.4875
1463	NW_005081574.1	360001	380000	42	15215.2	0.537422
1464	NW_005081574.1	340001	360000	38	17198	0.394491
1465	NW_005081574.1	320001	340000	47	12980	0.746362
1466	NW_005081574.1	300001	320000	40	15514.4	0.511954
1467	NW_005081574.1	280001	300000	28	15866.6	0.484927
1468	NW_005081574.1	260001	280000	51	13263	0.139583
1469	NW_005081574.1	240001	260000	43	14043.4	0.643451
1470	NW_005081574.1	220001	240000	45	15503	0.513514
1471	NW_005081574.1	200001	220000	35	12505.1	0.7921
1472	NW_005081574.1	180001	200000	49	11167.3	0.897089
1473	NW_005081574.1	160001	180000	41	14400.5	0.606549
1474	NW_005081574.1	140001	160000	48	10725.1	0.925156
1475	NW_005081574.1	120001	140000	54	13770.8	0.114062
1476	NW_005081574.1	100001	120000	37	14072.6	0.641372
1477	NW_005081574.1	80001	100000	36	17702.3	0.369023
1478	NW_005081574.1	60001	80000	37	15649.5	0.501559
1479	NW_005081574.1	40001	60000	17	13276.4	0.718815
1480	NW_005081844.1	260001	280000	25	11630.4	0.864345
1481	NW_005081844.1	240001	260000	40	14880.1	0.558732
1482	NW_005081844.1	220001	240000	49	12792.6	0.762474
1483	NW_005081844.1	200001	220000	42	13155.6	0.727131
1484	NW_005081844.1	180001	200000	59	12278.6	0.216146
1485	NW_005081844.1	160001	180000	57	12068.6	0.234375
1486	NW_005081844.1	140001	160000	48	14741.6	0.569647
1487	NW_005081844.1	120001	140000	60	15622.8	0.0447917
1488	NW_005081844.1	100001	120000	34	14158.9	0.632017
1489	NW_005081844.1	80001	100000	32	17325.4	0.387734
1490	NW_005081844.1	60001	80000	44	10188.3	0.955821
1491	NW_005081844.1	40001	60000	58	10344.1	0.433854
1492	NW_005081844.1	20001	40000	52	10594.2	0.399479
1493	NW_005081844.1	1	20000	40	10017.6	0.962578
1494	NW_005081653.1	2020001	2040000	7	5839.37	0.997401
1495	NW_005081653.1	2000001	2020000	51	11246.3	0.320312
1496	NW_005081653.1	1980001	2000000	51	12465.5	0.195833
1497	NW_005081653.1	1960001	1980000	37	12771.9	0.764553
1498	NW_005081653.1	1940001	1960000	50	14787.6	0.0671875
1499	NW_005081653.1	1920001	1940000	49	15119.8	0.5421
1500	NW_005081653.1	1900001	1920000	41	12158.2	0.824324
1501	NW_005081653.1	1880001	1900000	46	14667.8	0.576143
1502	NW_005081653.1	1860001	1880000	38	14460.5	0.597713
1503	NW_005081653.1	1840001	1860000	45	13434.6	0.701663
1504	NW_005081653.1	1820001	1840000	44	12001	0.8342
1505	NW_005081653.1	1800001	1820000	37	12694.9	0.774948
1506	NW_005081653.1	1780001	1800000	52	14037.8	0.0989583
1507	NW_005081653.1	1760001	1780000	40	15325.3	0.530665
1508	NW_005081653.1	1740001	1760000	52	14350.3	0.0859375
1509	NW_005081653.1	1720001	1740000	50	11745.8	0.266667
1510	NW_005081653.1	1700001	1720000	34	12666.4	0.777547
1511	NW_005081653.1	1680001	1700000	47	11933.8	0.839397
1512	NW_005081653.1	1660001	1680000	47	14414.4	0.60447
1513	NW_005081653.1	1640001	1660000	25	16726.9	0.425156
1514	NW_005081653.1	1620001	1640000	44	13714.1	0.670478
1515	NW_005081653.1	1600001	1620000	35	13321	0.715177
1516	NW_005081653.1	1580001	1600000	57	10161.1	0.458854
1517	NW_005081653.1	1560001	1580000	28	15773.3	0.489085
1518	NW_005081653.1	1540001	1560000	40	16158.3	0.465177
1519	NW_005081653.1	1520001	1540000	44	11415.8	0.879418
1520	NW_005081653.1	1500001	1520000	38	13441.6	0.701143
1521	NW_005081653.1	1480001	1500000	30	17451.4	0.380457
1522	NW_005081653.1	1460001	1480000	38	16384.7	0.443347
1523	NW_005081653.1	1440001	1460000	38	14847.7	0.56289
1524	NW_005081653.1	1420001	1440000	35	16209	0.461019
1525	NW_005081653.1	1400001	1420000	32	16746.6	0.424116
1526	NW_005081653.1	1380001	1400000	35	16226.2	0.45842
1527	NW_005081653.1	1360001	1380000	34	13684	0.674116
1528	NW_005081653.1	1340001	1360000	42	15170.4	0.538462
1529	NW_005081653.1	1320001	1340000	48	17805.6	0.361746
1530	NW_005081653.1	1300001	1320000	20	23370	0.174116
1531	NW_005081653.1	1280001	1300000	36	16864.4	0.41632
1532	NW_005081653.1	1260001	1280000	34	17386.7	0.384615
1533	NW_005081653.1	1240001	1260000	42	16022.9	0.474012
1534	NW_005081653.1	1220001	1240000	36	15354.6	0.528067
1535	NW_005081653.1	1200001	1220000	46	12764.1	0.766112
1536	NW_005081653.1	1180001	1200000	30	16338.2	0.448025
1537	NW_005081653.1	1160001	1180000	42	15937.8	0.47973
1538	NW_005081653.1	1140001	1160000	41	14179.6	0.629418
1539	NW_005081653.1	1120001	1140000	32	16483.6	0.43763
1540	NW_005081653.1	1100001	1120000	41	15988.1	0.477131
1541	NW_005081653.1	1080001	1100000	30	16273.8	0.453742
1542	NW_005081653.1	1060001	1080000	39	18671.1	0.325364
1543	NW_005081653.1	1040001	1060000	23	19933.9	0.27131
1544	NW_005081653.1	1020001	1040000	35	14361.5	0.611227
1545	NW_005081653.1	1000001	1020000	34	13175	0.725572
1546	NW_005081653.1	980001	1000000	39	12266.5	0.81289
1547	NW_005081653.1	960001	980000	37	15537.2	0.510395
1548	NW_005081653.1	940001	960000	32	14524.9	0.589917
1549	NW_005081653.1	920001	940000	36	16216.7	0.459459
1550	NW_005081653.1	900001	920000	36	14680.2	0.573285
1551	NW_005081653.1	880001	900000	36	11794.6	0.847713
1552	NW_005081653.1	860001	880000	33	12764.7	0.765593
1553	NW_005081653.1	840001	860000	40	14215.7	0.626819
1554	NW_005081653.1	820001	840000	44	15641.7	0.502079
1555	NW_005081653.1	800001	820000	56	11447.2	0.294792
1556	NW_005081653.1	780001	800000	31	16377.4	0.444387
1557	NW_005081653.1	760001	780000	51	13191.2	0.145313
1558	NW_005081653.1	740001	760000	41	16213.5	0.459979
1559	NW_005081653.1	720001	740000	43	13067.8	0.738046
1560	NW_005081653.1	700001	720000	57	14000.2	0.101042
1561	NW_005081653.1	680001	700000	46	14597.4	0.582121
1562	NW_005081653.1	660001	680000	48	11316.3	0.886694
1563	NW_005081653.1	640001	660000	64	9942.1	0.494792
1564	NW_005081653.1	620001	640000	67	11342.5	0.307812
1565	NW_005081653.1	600001	620000	47	13316.4	0.716216
1566	NW_005081653.1	580001	600000	62	12382.2	0.205729
1567	NW_005081653.1	560001	580000	52	12142.3	0.228646
1568	NW_005081653.1	540001	560000	49	14959.3	0.555094
1569	NW_005081653.1	520001	540000	45	14617.6	0.580561
1570	NW_005081653.1	500001	520000	49	14218.2	0.626299
1571	NW_005081653.1	480001	500000	31	15344.5	0.529626
1572	NW_005081653.1	460001	480000	47	15421.3	0.52131
1573	NW_005081653.1	440001	460000	35	14997.4	0.551975
1574	NW_005081653.1	420001	440000	45	13601.8	0.685031
1575	NW_005081653.1	400001	420000	34	13581.3	0.68815
1576	NW_005081653.1	380001	400000	38	11335.1	0.884096
1577	NW_005081653.1	360001	380000	50	9069.75	0.638021
1578	NW_005081653.1	340001	360000	54	9372.11	0.584896
1579	NW_005081653.1	320001	340000	49	10603.7	0.933472
1580	NW_005081653.1	300001	320000	59	10164.2	0.458333
1581	NW_005081653.1	280001	300000	50	12409.8	0.203125
1582	NW_005081653.1	260001	280000	42	13215.6	0.722453
1583	NW_005081653.1	240001	260000	51	14023.6	0.1
1584	NW_005081653.1	220001	240000	52	14068.6	0.096875
1585	NW_005081653.1	200001	220000	39	15855.6	0.485967
1586	NW_005081653.1	180001	200000	38	17631.2	0.372661
1587	NW_005081653.1	160001	180000	23	20343.5	0.260915
1588	NW_005081653.1	140001	160000	47	14425.4	0.602911
1589	NW_005081653.1	120001	140000	40	10740.8	0.924116
1590	NW_005081653.1	100001	120000	39	14258.5	0.622661
1591	NW_005081653.1	80001	100000	37	14873.8	0.560291
1592	NW_005081653.1	60001	80000	36	12859.4	0.754158
1593	NW_005081653.1	40001	60000	45	12590	0.783264
1594	NW_005081653.1	20001	40000	37	15404.2	0.523389
1595	NW_005081653.1	1	20000	26	13670.6	0.675676
1596	NW_005081589.1	4440001	4460000	19	8120.96	0.992723
1597	NW_005081589.1	4420001	4440000	38	12599.4	0.782225
1598	NW_005081589.1	4400001	4420000	41	12808.6	0.761435
1599	NW_005081589.1	4380001	4400000	40	13955.4	0.653846
1600	NW_005081589.1	4360001	4380000	42	11773.5	0.849792
1601	NW_005081589.1	4340001	4360000	42	12222.7	0.818607
1602	NW_005081589.1	4320001	4340000	33	12855	0.754678
1603	NW_005081589.1	4300001	4320000	46	12701.3	0.773909
1604	NW_005081589.1	4280001	4300000	44	15673.2	0.498441
1605	NW_005081589.1	4260001	4280000	40	13657.3	0.677755
1606	NW_005081589.1	4240001	4260000	43	10352.1	0.948025
1607	NW_005081589.1	4220001	4240000	47	12255.9	0.816528
1608	NW_005081589.1	4200001	4220000	50	12438.6	0.198958
1609	NW_005081589.1	4180001	4200000	21	16278.3	0.452703
1610	NW_005081589.1	4160001	4180000	50	15323.2	0.0536458
1611	NW_005081589.1	4140001	4160000	28	15402.3	0.524428
1612	NW_005081589.1	4120001	4140000	31	15939	0.47921
1613	NW_005081589.1	4100001	4120000	40	15538.7	0.509875
1614	NW_005081589.1	4080001	4100000	39	13370.5	0.710499
1615	NW_005081589.1	4060001	4080000	48	13092.1	0.734407
1616	NW_005081589.1	4040001	4060000	50	11108.6	0.334375
1617	NW_005081589.1	4020001	4040000	42	14561.7	0.585239
1618	NW_005081589.1	4000001	4020000	41	13771.7	0.662162
1619	NW_005081589.1	3980001	4000000	35	14512.1	0.591476
1620	NW_005081589.1	3960001	3980000	37	13464.4	0.698545
1621	NW_005081589.1	3940001	3960000	38	11747.8	0.852391
1622	NW_005081589.1	3920001	3940000	38	12760.4	0.766632
1623	NW_005081589.1	3900001	3920000	42	12525.3	0.790541
1624	NW_005081589.1	3880001	3900000	43	11726.4	0.855509
1625	NW_005081589.1	3860001	3880000	46	11764.9	0.850832
1626	NW_005081589.1	3840001	3860000	35	14134.4	0.633576
1627	NW_005081589.1	3820001	3840000	49	13548.4	0.689709
1628	NW_005081589.1	3800001	3820000	42	14127.4	0.635135
1629	NW_005081589.1	3780001	3800000	51	11708.6	0.269271
1630	NW_005081589.1	3760001	3780000	40	13165.7	0.726611
1631	NW_005081589.1	3740001	3760000	50	13679.6	0.119792
1632	NW_005081589.1	3720001	3740000	48	15270.5	0.532744
1633	NW_005081589.1	3700001	3720000	52	18537.9	0.0161458
1634	NW_005081589.1	3680001	3700000	30	18929.1	0.316008
1635	NW_005081589.1	3660001	3680000	36	14164.5	0.630457
1636	NW_005081589.1	3640001	3660000	50	12697.6	0.178385
1637	NW_005081589.1	3620001	3640000	48	14067.6	0.641892
1638	NW_005081589.1	3600001	3620000	49	14431	0.601871
1639	NW_005081589.1	3580001	3600000	64	10455.7	0.41875
1640	NW_005081589.1	3560001	3580000	58	13495.7	0.126562
1641	NW_005081589.1	3540001	3560000	39	14455.6	0.598753
1642	NW_005081589.1	3520001	3540000	50	14572.2	0.0744792
1643	NW_005081589.1	3500001	3520000	46	14024.1	0.64657
1644	NW_005081589.1	3480001	3500000	44	14698.9	0.572245
1645	NW_005081589.1	3460001	3480000	57	13256.4	0.140104
1646	NW_005081589.1	3440001	3460000	48	15670.5	0.49896
1647	NW_005081589.1	3420001	3440000	39	19076.8	0.309771
1648	NW_005081589.1	3400001	3420000	53	18354.6	0.0182292
1649	NW_005081589.1	3380001	3400000	42	16585.2	0.432432
1650	NW_005081589.1	3360001	3380000	40	18128.3	0.347193
1651	NW_005081589.1	3340001	3360000	55	14569	0.075
1652	NW_005081589.1	3320001	3340000	38	15242.7	0.534823
1653	NW_005081589.1	3300001	3320000	48	16460.7	0.438669
1654	NW_005081589.1	3280001	3300000	35	18358.7	0.335239
1655	NW_005081589.1	3260001	3280000	40	17754.5	0.365385
1656	NW_005081589.1	3240001	3260000	45	15678.3	0.497921
1657	NW_005081589.1	3220001	3240000	47	16188.5	0.462058
1658	NW_005081589.1	3200001	3220000	37	20084.8	0.267152
1659	NW_005081589.1	3180001	3200000	31	21942.2	0.206341
1660	NW_005081589.1	3160001	3180000	48	18787.5	0.321206
1661	NW_005081589.1	3140001	3160000	35	14462	0.597193
1662	NW_005081589.1	3120001	3140000	44	15814.7	0.487006
1663	NW_005081589.1	3100001	3120000	35	17868.6	0.358628
1664	NW_005081589.1	3080001	3100000	65	11316.5	0.308333
1665	NW_005081589.1	3060001	3080000	47	15097.3	0.543139
1666	NW_005081589.1	3040001	3060000	43	17139.8	0.397609
1667	NW_005081589.1	3020001	3040000	45	18186.7	0.343555
1668	NW_005081589.1	3000001	3020000	43	19279.7	0.299376
1669	NW_005081589.1	2980001	3000000	37	21936	0.206861
1670	NW_005081589.1	2960001	2980000	47	23288.6	0.176195
1671	NW_005081589.1	2940001	2960000	52	15121.5	0.0609375
1672	NW_005081589.1	2920001	2940000	54	12494.4	0.192708
1673	NW_005081589.1	2900001	2920000	71	11975.5	0.244792
1674	NW_005081589.1	2880001	2900000	71	12160.9	0.226042
1675	NW_005081589.1	2860001	2880000	42	14877.5	0.559252
1676	NW_005081589.1	2840001	2860000	59	10182.9	0.455729
1677	NW_005081589.1	2820001	2840000	50	10990.1	0.348958
1678	NW_005081589.1	2800001	2820000	41	13039.8	0.741684
1679	NW_005081589.1	2780001	2800000	47	13953.1	0.654366
1680	NW_005081589.1	2760001	2780000	45	13050.3	0.740644
1681	NW_005081589.1	2740001	2760000	47	12611.6	0.781705
1682	NW_005081589.1	2720001	2740000	70	12391.9	0.204687
1683	NW_005081589.1	2700001	2720000	61	11439.1	0.296615
1684	NW_005081589.1	2680001	2700000	96	12470	0.195312
1685	NW_005081589.1	2660001	2680000	61	14552.4	0.0760417
1686	NW_005081589.1	2640001	2660000	75	13850.5	0.109375
1687	NW_005081589.1	2620001	2640000	87	18836.4	0.0151042
1688	NW_005081589.1	2600001	2620000	34	21249.1	0.225052
1689	NW_005081589.1	2580001	2600000	79	15100.6	0.0619792
1690	NW_005081589.1	2560001	2580000	92	11996.6	0.241146
1691	NW_005081589.1	2540001	2560000	73	11530.9	0.288542
1692	NW_005081589.1	2520001	2540000	54	13605.6	0.122917
1693	NW_005081589.1	2500001	2520000	73	10999.4	0.347396
1694	NW_005081589.1	2480001	2500000	92	7988.06	0.799479
1695	NW_005081589.1	2460001	2480000	62	9126.3	0.628646
1696	NW_005081589.1	2440001	2460000	96	6356.4	0.964583
1697	NW_005081589.1	2420001	2440000	101	6221.82	0.151642
1698	NW_005081589.1	2400001	2420000	89	6486.93	0.95625
1699	NW_005081589.1	2380001	2400000	88	6487.53	0.955729
1700	NW_005081589.1	2360001	2380000	96	7220.14	0.884896
1701	NW_005081589.1	2340001	2360000	105	8075.37	0.0419287
1702	NW_005081589.1	2320001	2340000	107	9066.47	0.0230608
1703	NW_005081589.1	2300001	2320000	81	8888.18	0.665625
1704	NW_005081589.1	2280001	2300000	75	8159.46	0.779687
1705	NW_005081589.1	2260001	2280000	62	8646.95	0.700521
1706	NW_005081589.1	2240001	2260000	57	10282.1	0.441146
1707	NW_005081589.1	2220001	2240000	62	8979.8	0.654687
1708	NW_005081589.1	2200001	2220000	74	7689.43	0.838542
1709	NW_005081589.1	2180001	2200000	69	7662.84	0.841146
1710	NW_005081589.1	2160001	2180000	60	8218.88	0.769271
1711	NW_005081589.1	2140001	2160000	80	7210.51	0.885938
1712	NW_005081589.1	2120001	2140000	92	6826.78	0.923958
1713	NW_005081589.1	2100001	2120000	69	9458.27	0.571875
1714	NW_005081589.1	2080001	2100000	75	10461.7	0.417708
1715	NW_005081589.1	2060001	2080000	71	8898.57	0.664062
1716	NW_005081589.1	2040001	2060000	78	9891.53	0.502083
1717	NW_005081589.1	2020001	2040000	65	10802	0.374479
1718	NW_005081589.1	2000001	2020000	55	11610.2	0.278646
1719	NW_005081589.1	1980001	2000000	66	10679	0.3875
1720	NW_005081589.1	1960001	1980000	66	8314.18	0.753125
1721	NW_005081589.1	1940001	1960000	73	9039.46	0.64375
1722	NW_005081589.1	1920001	1940000	69	8997.23	0.65
1723	NW_005081589.1	1900001	1920000	68	10030.8	0.484896
1724	NW_005081589.1	1880001	1900000	60	10342.2	0.434375
1725	NW_005081589.1	1860001	1880000	66	10953.6	0.355208
1726	NW_005081589.1	1840001	1860000	55	11924.5	0.249479
1727	NW_005081589.1	1820001	1840000	65	15621.1	0.0453125
1728	NW_005081589.1	1800001	1820000	102	9564.69	0.0167715
1729	NW_005081589.1	1780001	1800000	65	8843.85	0.674479
1730	NW_005081589.1	1760001	1780000	63	21976.7	0.00572917
1731	NW_005081589.1	1740001	1760000	6	23802.2	0.163721
1732	NW_005081589.1	1720001	1740000	90	18446.2	0.0166667
1733	NW_005081589.1	1700001	1720000	88	8186.15	0.773958
1734	NW_005081589.1	1680001	1700000	92	7494.15	0.857292
1735	NW_005081589.1	1660001	1680000	73	8178.09	0.777083
1736	NW_005081589.1	1640001	1660000	98	7956.26	0.806771
1737	NW_005081589.1	1620001	1640000	67	9611.23	0.547917
1738	NW_005081589.1	1600001	1620000	92	8070.11	0.790625
1739	NW_005081589.1	1580001	1600000	88	6763.5	0.929167
1740	NW_005081589.1	1560001	1580000	68	7516.91	0.854688
1741	NW_005081589.1	1540001	1560000	80	8595.04	0.7125
1742	NW_005081589.1	1520001	1540000	69	8639.22	0.701562
1743	NW_005081589.1	1500001	1520000	59	9574.76	0.554688
1744	NW_005081589.1	1480001	1500000	76	10213.5	0.451042
1745	NW_005081589.1	1460001	1480000	68	10313.9	0.438021
1746	NW_005081589.1	1440001	1460000	62	9502.14	0.567187
1747	NW_005081589.1	1420001	1440000	86	7540.15	0.852083
1748	NW_005081589.1	1400001	1420000	48	12924.4	0.75104
1749	NW_005081589.1	1380001	1400000	68	8259.24	0.763021
1750	NW_005081589.1	1360001	1380000	71	8771.99	0.684896
1751	NW_005081589.1	1340001	1360000	45	11545.3	0.869023
1752	NW_005081589.1	1320001	1340000	55	9338	0.594792
1753	NW_005081589.1	1300001	1320000	65	10925.3	0.360417
1754	NW_005081589.1	1280001	1300000	60	10489.5	0.414583
1755	NW_005081589.1	1260001	1280000	48	13964.3	0.652807
1756	NW_005081589.1	1240001	1260000	52	12927	0.160417
1757	NW_005081589.1	1220001	1240000	71	10927.7	0.359896
1758	NW_005081589.1	1200001	1220000	66	10176.3	0.45625
1759	NW_005081589.1	1180001	1200000	64	10748.7	0.382292
1760	NW_005081589.1	1160001	1180000	68	9565.51	0.555729
1761	NW_005081589.1	1140001	1160000	51	12242.9	0.218229
1762	NW_005081589.1	1120001	1140000	47	13290.8	0.717775
1763	NW_005081589.1	1100001	1120000	53	12828.4	0.167187
1764	NW_005081589.1	1080001	1100000	62	12540.7	0.190625
1765	NW_005081589.1	1060001	1080000	72	9778.47	0.516667
1766	NW_005081589.1	1040001	1060000	63	11439.1	0.296615
1767	NW_005081589.1	1020001	1040000	81	8696.66	0.692708
1768	NW_005081589.1	1000001	1020000	73	9089.29	0.633854
1769	NW_005081589.1	980001	1000000	45	13589.7	0.685551
1770	NW_005081589.1	960001	980000	47	14869.6	0.561331
1771	NW_005081589.1	940001	960000	59	11014.8	0.345833
1772	NW_005081589.1	920001	940000	60	9997.52	0.489063
1773	NW_005081589.1	900001	920000	65	9886.48	0.502604
1774	NW_005081589.1	880001	900000	51	12233	0.21875
1775	NW_005081589.1	860001	880000	55	10947.3	0.35625
1776	NW_005081589.1	840001	860000	61	10799.3	0.375
1777	NW_005081589.1	820001	840000	47	12447	0.797817
1778	NW_005081589.1	800001	820000	63	12176	0.223958
1779	NW_005081589.1	780001	800000	57	10118.6	0.466667
1780	NW_005081589.1	760001	780000	80	9277.61	0.604167
1781	NW_005081589.1	740001	760000	77	8179.86	0.776563
1782	NW_005081589.1	720001	740000	67	7901.27	0.815104
1783	NW_005081589.1	700001	720000	56	8727.73	0.689063
1784	NW_005081589.1	680001	700000	77	9129.99	0.627604
1785	NW_005081589.1	660001	680000	59	8837.54	0.675521
1786	NW_005081589.1	640001	660000	56	11680.1	0.272917
1787	NW_005081589.1	620001	640000	53	12394.1	0.204167
1788	NW_005081589.1	600001	620000	56	14158.4	0.0932292
1789	NW_005081589.1	580001	600000	68	23010.6	0.003125
1790	NW_005081589.1	560001	580000	25	51814.6	0.00571726
1791	NW_005081589.1	520001	540000	10	55510.3	0.00519751
1792	NW_005081589.1	500001	520000	51	32145.6	0.00208333
1793	NW_005081589.1	480001	500000	77	11944.8	0.247917
1794	NW_005081589.1	460001	480000	61	12867	0.164062
1795	NW_005081589.1	440001	460000	42	15507.9	0.512994
1796	NW_005081589.1	420001	440000	44	18941.7	0.314969
1797	NW_005081589.1	400001	420000	68	16344.7	0.0348958
1798	NW_005081589.1	380001	400000	78	11037.4	0.342708
1799	NW_005081589.1	360001	380000	65	11903.2	0.251563
1800	NW_005081589.1	340001	360000	66	10174.7	0.456771
1801	NW_005081589.1	320001	340000	53	9535.48	0.561979
1802	NW_005081589.1	300001	320000	88	9141.22	0.626042
1803	NW_005081589.1	280001	300000	82	7623.15	0.845313
1804	NW_005081589.1	260001	280000	76	6352.61	0.965104
1805	NW_005081589.1	240001	260000	62	8790.84	0.683854
1806	NW_005081589.1	220001	240000	63	7903.4	0.814063
1807	NW_005081589.1	200001	220000	78	9177.32	0.617708
1808	NW_005081589.1	180001	200000	61	9926.75	0.496875
1809	NW_005081589.1	160001	180000	68	9254.05	0.607292
1810	NW_005081589.1	140001	160000	66	12517.6	0.191146
1811	NW_005081589.1	120001	140000	56	11509.3	0.290104
1812	NW_005081589.1	100001	120000	62	9552.57	0.557813
1813	NW_005081589.1	80001	100000	90	9742.75	0.525
1814	NW_005081589.1	60001	80000	87	8883.93	0.666667
1815	NW_005081589.1	40001	60000	56	9766.08	0.520312
1816	NW_005081589.1	20001	40000	53	11850.4	0.255729
1817	NW_005081589.1	1	20000	62	8883.01	0.667188
1818	NW_005081611.1	1	20000	56	8899.57	0.663542
1819	NW_005081611.1	20001	40000	64	6891.93	0.919792
1820	NW_005081611.1	40001	60000	92	6248.02	0.96875
1821	NW_005081611.1	60001	80000	85	7678.22	0.840104
1822	NW_005081611.1	80001	100000	65	7968.42	0.804167
1823	NW_005081611.1	100001	120000	86	6747.44	0.932813
1824	NW_005081611.1	120001	140000	59	9629.93	0.544792
1825	NW_005081611.1	140001	160000	49	9193.73	0.981809
1826	NW_005081611.1	160001	180000	100	5816.18	0.208246
1827	NW_005081611.1	180001	200000	65	6589.51	0.945833
1828	NW_005081611.1	200001	220000	94	5180.18	0.997396
1829	NW_005081611.1	220001	240000	79	7363.81	0.869271
1830	NW_005081611.1	240001	260000	87	5346.94	0.995313
1831	NW_005081611.1	260001	280000	108	5017.01	0.34731
1832	NW_005081611.1	280001	300000	106	4166.39	0.489168
1833	NW_005081611.1	300001	320000	88	5444.65	0.994271
1834	NW_005081611.1	320001	340000	96	8003.87	0.797396
1835	NW_005081611.1	340001	360000	91	8272.4	0.760417
1836	NW_005081611.1	360001	380000	95	6072.07	0.973437
1837	NW_005081611.1	380001	400000	80	5984.3	0.975
1838	NW_005081611.1	400001	420000	94	5541.63	0.991667
1839	NW_005081611.1	420001	440000	77	6599.23	0.945312
1840	NW_005081611.1	440001	460000	82	5789.29	0.982812
1841	NW_005081611.1	460001	480000	98	6509.52	0.953125
1842	NW_005081611.1	480001	500000	73	6612.16	0.943229
1843	NW_005081611.1	500001	520000	67	9076.39	0.635938
1844	NW_005081611.1	520001	540000	62	8449.04	0.733333
1845	NW_005081611.1	540001	560000	45	9912.87	0.969854
1846	NW_005081611.1	560001	580000	64	9879.9	0.503646
1847	NW_005081611.1	580001	600000	69	9932.02	0.496354
1848	NW_005081611.1	600001	620000	72	7925.88	0.810417
1849	NW_005081611.1	620001	640000	79	8636.54	0.703125
1850	NW_005081611.1	640001	660000	61	10653.9	0.391667
1851	NW_005081611.1	660001	680000	60	8013	0.795312
1852	NW_005081611.1	680001	700000	66	10109.6	0.470313
1853	NW_005081611.1	700001	720000	44	12122.3	0.826923
1854	NW_005081611.1	720001	740000	62	9506.8	0.565625
1855	NW_005081611.1	740001	760000	81	12550.4	0.189583
1856	NW_005081611.1	760001	780000	44	12624.2	0.780146
1857	NW_005081611.1	780001	800000	72	8252.86	0.764062
1858	NW_005081611.1	800001	820000	49	10002.5	0.965177
1859	NW_005081611.1	820001	840000	56	9768.44	0.519792
1860	NW_005081611.1	840001	860000	52	10298.9	0.440104
1861	NW_005081611.1	860001	880000	61	10494.7	0.414062
1862	NW_005081611.1	880001	900000	62	10575.5	0.402604
1863	NW_005081611.1	900001	920000	60	10136.1	0.461979
1864	NW_005081611.1	920001	940000	53	9673.98	0.535937
1865	NW_005081611.1	940001	960000	62	11288.2	0.313021
1866	NW_005081611.1	960001	980000	45	12564.2	0.786383
1867	NW_005081611.1	980001	1000000	60	10220.8	0.450521
1868	NW_005081611.1	1000001	1020000	45	10950.5	0.911123
1869	NW_005081611.1	1020001	1040000	49	12877.6	0.753119
1870	NW_005081611.1	1040001	1060000	39	12728	0.77079
1871	NW_005081611.1	1060001	1080000	60	10818.6	0.372917
1872	NW_005081611.1	1080001	1100000	72	11525.7	0.289062
1873	NW_005081611.1	1100001	1120000	38	12012.6	0.83264
1874	NW_005081611.1	1120001	1140000	45	10917.5	0.912162
1875	NW_005081611.1	1140001	1160000	39	12068.7	0.829522
1876	NW_005081611.1	1160001	1180000	46	14085.6	0.638254
1877	NW_005081611.1	1180001	1200000	40	14028.5	0.64553
1878	NW_005081611.1	1200001	1220000	57	12329.7	0.211458
1879	NW_005081611.1	1220001	1240000	50	14367	0.0854167
1880	NW_005081611.1	1240001	1260000	43	13756.8	0.665281
1881	NW_005081611.1	1260001	1280000	46	12530.7	0.789501
1882	NW_005081611.1	1280001	1300000	36	14378.4	0.609148
1883	NW_005081611.1	1300001	1320000	42	11944.1	0.838877
1884	NW_005081611.1	1320001	1340000	48	12282.5	0.811331
1885	NW_005081611.1	1340001	1360000	52	10424.7	0.422396
1886	NW_005081611.1	1360001	1380000	59	10935.6	0.357812
1887	NW_005081611.1	1380001	1400000	63	11367.4	0.302604
1888	NW_005081611.1	1400001	1420000	46	12486.7	0.793659
1889	NW_005081611.1	1420001	1440000	44	13540.5	0.691268
1890	NW_005081611.1	1440001	1460000	49	12957.5	0.748441
1891	NW_005081611.1	1460001	1480000	30	15765.3	0.490644
1892	NW_005081611.1	1480001	1500000	48	17663	0.370582
1893	NW_005081611.1	1500001	1520000	31	20684.4	0.24948
1894	NW_005081611.1	1520001	1540000	38	20930	0.237526
1895	NW_005081611.1	1540001	1560000	50	17743.3	0.0234375
1896	NW_005081611.1	1560001	1580000	52	17459.9	0.0265625
1897	NW_005081611.1	1580001	1600000	40	17585.6	0.37474
1898	NW_005081611.1	1600001	1620000	61	15335.9	0.0526042
1899	NW_005081611.1	1620001	1640000	51	14951.3	0.0625
1900	NW_005081611.1	1640001	1660000	40	12646.8	0.779626
1901	NW_005081611.1	1660001	1680000	49	11416	0.878898
1902	NW_005081611.1	1680001	1700000	49	13393.8	0.70894
1903	NW_005081611.1	1700001	1720000	55	12715.3	0.175521
1904	NW_005081611.1	1720001	1740000	47	18413.6	0.33264
1905	NW_005081611.1	1740001	1760000	59	17020.1	0.0291667
1906	NW_005081611.1	1760001	1780000	53	18342.1	0.01875
1907	NW_005081611.1	1780001	1800000	29	20690.4	0.24896
1908	NW_005081611.1	1800001	1820000	56	16154.7	0.0380208
1909	NW_005081611.1	1820001	1840000	69	9906.06	0.498437
1910	NW_005081611.1	1840001	1860000	51	18307	0.0192708
1911	NW_005081611.1	1860001	1880000	46	21041.6	0.233368
1912	NW_005081611.1	1880001	1900000	34	19396.8	0.294699
1913	NW_005081611.1	1900001	1920000	39	19917.6	0.272349
1914	NW_005081611.1	1920001	1940000	31	19407.1	0.293659
1915	NW_005081611.1	1940001	1960000	35	16061	0.471933
1916	NW_005081611.1	1960001	1980000	57	10570.7	0.405208
1917	NW_005081611.1	1980001	2000000	50	11344.2	0.30625
1918	NW_005081611.1	2000001	2020000	47	11295.3	0.887734
1919	NW_005081611.1	2020001	2040000	59	15159.5	0.059375
1920	NW_005081611.1	2040001	2060000	53	14877.6	0.0640625
1921	NW_005081611.1	2060001	2080000	64	15681.2	0.04375
1922	NW_005081611.1	2080001	2100000	41	16346	0.447505
1923	NW_005081611.1	2100001	2120000	49	14283.2	0.616944
1924	NW_005081611.1	2120001	2140000	39	13119.9	0.730249
1925	NW_005081611.1	2140001	2160000	48	16909.1	0.412682
1926	NW_005081611.1	2160001	2180000	41	19721.2	0.280146
1927	NW_005081611.1	2180001	2200000	24	20006.5	0.269751
1928	NW_005081611.1	2200001	2220000	31	18346.7	0.336798
1929	NW_005081611.1	2220001	2240000	45	11422.5	0.877859
1930	NW_005081611.1	2240001	2260000	37	14614.1	0.581081
1931	NW_005081611.1	2260001	2280000	39	18360.5	0.334719
1932	NW_005081611.1	2280001	2300000	31	19507.6	0.287942
1933	NW_005081611.1	2300001	2320000	39	18866.6	0.317048
1934	NW_005081611.1	2320001	2340000	37	15401.1	0.524948
1935	NW_005081611.1	2340001	2360000	40	17794.3	0.362786
1936	NW_005081611.1	2360001	2380000	35	14255.8	0.623181
1937	NW_005081611.1	2380001	2400000	36	15519.8	0.511435
1938	NW_005081611.1	2400001	2420000	43	16536.7	0.435551
1939	NW_005081611.1	2420001	2440000	34	14046.3	0.642931
1940	NW_005081611.1	2440001	2460000	34	15974.7	0.477651
1941	NW_005081611.1	2460001	2480000	27	19336.5	0.296778
1942	NW_005081611.1	2480001	2500000	29	17118.5	0.399168
1943	NW_005081611.1	2500001	2520000	46	14265.9	0.620062
1944	NW_005081611.1	2520001	2540000	44	15010.7	0.549376
1945	NW_005081611.1	2540001	2560000	44	14757.1	0.568087
1946	NW_005081611.1	2560001	2580000	32	17068	0.402807
1947	NW_005081611.1	2580001	2600000	40	17656	0.371102
1948	NW_005081611.1	2600001	2620000	34	16357.2	0.445946
1949	NW_005081611.1	2620001	2640000	33	15661.1	0.49948
1950	NW_005081611.1	2640001	2660000	37	16009.9	0.475572
1951	NW_005081611.1	2660001	2680000	38	15737.9	0.492723
1952	NW_005081611.1	2680001	2700000	39	17312.4	0.388773
1953	NW_005081611.1	2700001	2720000	35	15323	0.531185
1954	NW_005081611.1	2720001	2740000	34	17267.4	0.390852
1955	NW_005081611.1	2740001	2760000	43	19251.6	0.301455
1956	NW_005081611.1	2760001	2780000	31	16592	0.431393
1957	NW_005081611.1	2780001	2800000	35	14636.5	0.580042
1958	NW_005081611.1	2800001	2820000	40	15710.6	0.495322
1959	NW_005081611.1	2820001	2840000	23	22411.2	0.194906
1960	NW_005081611.1	2840001	2860000	32	23045.1	0.182432
1961	NW_005081611.1	2860001	2880000	45	13985.7	0.650728
1962	NW_005081611.1	2880001	2900000	41	14241.9	0.623701
1963	NW_005081611.1	2900001	2920000	26	18243.2	0.341996
1964	NW_005081611.1	2920001	2940000	46	16265.2	0.454782
1965	NW_005081611.1	2940001	2960000	39	16156.7	0.465696
1966	NW_005081611.1	2960001	2980000	28	17970.8	0.35343
1967	NW_005081611.1	2980001	3000000	47	15572.9	0.507277
1968	NW_005081611.1	3000001	3020000	40	14739	0.570166
1969	NW_005081611.1	3020001	3040000	45	14226.3	0.62474
1970	NW_005081611.1	3040001	3060000	36	16347.4	0.446985
1971	NW_005081611.1	3060001	3080000	28	17236.8	0.391892
1972	NW_005081611.1	3080001	3100000	37	19576.8	0.285863
1973	NW_005081611.1	3100001	3120000	34	18123.9	0.347713
1974	NW_005081611.1	3120001	3140000	30	18654.4	0.326403
1975	NW_005081611.1	3140001	3160000	47	15728.5	0.494283
1976	NW_005081611.1	3160001	3180000	25	18352.6	0.335759
1977	NW_005081611.1	3180001	3200000	47	15150.6	0.539501
1978	NW_005081611.1	3200001	3220000	41	17839.7	0.359667
1979	NW_005081611.1	3220001	3240000	26	16846.8	0.41736
1980	NW_005081611.1	3240001	3260000	60	13096.9	0.15
1981	NW_005081611.1	3260001	3280000	32	14826.2	0.564449
1982	NW_005081611.1	3280001	3300000	41	17966.7	0.35395
1983	NW_005081611.1	3300001	3320000	30	19772.4	0.277547
1984	NW_005081611.1	3320001	3340000	44	13529.7	0.692827
1985	NW_005081611.1	3340001	3360000	42	16090.4	0.470894
1986	NW_005081611.1	3360001	3380000	44	16963.2	0.407484
1987	NW_005081611.1	3380001	3400000	29	17928.9	0.356029
1988	NW_005081611.1	3400001	3420000	33	17317.8	0.388254
1989	NW_005081611.1	3420001	3440000	21	22870.1	0.186071
1990	NW_005081611.1	3440001	3460000	37	20507.3	0.253638
1991	NW_005081611.1	3460001	3480000	40	17497.4	0.377859
1992	NW_005081611.1	3480001	3500000	39	17022.5	0.405925
1993	NW_005081611.1	3500001	3520000	48	13405.5	0.706861
1994	NW_005081611.1	3520001	3540000	53	12142.5	0.228125
1995	NW_005081611.1	3540001	3560000	37	11278.5	0.888773
1996	NW_005081611.1	3560001	3580000	44	9188.1	0.982328
1997	NW_005081611.1	3580001	3600000	1	2732.65	1
1998	NW_005081632.1	2500001	2520000	48	10971.3	0.908524
1999	NW_005081632.1	2480001	2500000	36	13588.7	0.686071
[truncated: 2,547 more rows]
